# Supplementary material
Source: PubMed Central journal article supplement (PMC11578263)
Supplement: SC-015-D4SC06150K-s001.pdf [file SC-015-D4SC06150K-s001.pdf]

## Supporting Information

# **Controlling the thermodynamic stability of conformational isomers of bistricyclic aromatic enes by introducing boron and silicon atoms**

Kohei Yamada,<sup>a</sup> Yohei Adachi <sup>\*a</sup> and Joji Ohshita <sup>\*a,b</sup>

<sup>a</sup> *Smart Innovation Program, Graduate School of Advanced Science and Engineering, Hiroshima University, Higashi-Hiroshima, Hiroshima 739-8527, Japan. E-mail: yadachi@hiroshima-u.ac.jp, jo@hiroshima-u.ac.jp*

<sup>b</sup> *Division of Materials Model-Based Research, Digital Monozukuri (Manufacturing) Education and Research Center, Hiroshima University, Higashi-Hiroshima, Hiroshima 739-8527, Japan.*

## **Experimental section**

### *General*

For reaction solvents, toluene, benzene and Et<sub>2</sub>O were purchased from Kanto Chemical Kanto Chemical Co., Ltd. and were distilled from calcium hydride and stored over activated molecular sieves under argon until use. All other chemicals were purchased from FUJIFILM Wako Pure Chemical Industries, Ltd. or TCI Co., Ltd. Starting materials 8,8-dimethyl-4,8-dihydrosilino[2,3-b:6,5-b']dithiophene (**1-Me**),<sup>[1]</sup> dichlorodi(1-naphthyl)silane,<sup>[2]</sup> and 8-(2,4,6-triisopropylphenyl)boronino[2,3-b:6,5-b']dithiophene-4(8H)-thione (**6**)<sup>[3]</sup> were prepared according to the literature. Room-temperature NMR spectra were recorded on Varian System 500 and 400MR spectrometers. On the other hand, variable-temperature NMR spectra were recorded on JNM-ECA500 spectrometers at the Natural Science Center for Basic Research and Development (N-BARD), Hiroshima University. Abbreviations Th, Tip, Ph, and Np used for the following NMR assignments stand for fused thiophene ring, triptyl group, phenyl group, naphthyl group, respectively. High-resolution APCI and ESI mass spectra were obtained on a Thermo Fisher Scientific LTQ Orbitrap XL spectrometer at N-BARD. On the other hand, High-resolution FD mass spectra were obtained on a JMS-T2000GC "AccuTOF GC-alpha" at N-BARD. Fourier transform infrared (FTIR) spectroscopy was performed using a Shimadzu IRAffinity-1 spectrophotometer. TG/DTA analysis was carried out under gentle air flow at a heating rate of 10 °C/min using the SII TG/DTA6200 analyzer.

### *DFT calculations*

Geometrical optimizations were performed on a Gaussian 16 program at the B3LYP/6-31G(d) level.<sup>[4]</sup> All the optimized geometries were verified by vibrational frequency analysis at the same level of theory and found as true minima, as negative vibrational frequencies were not present. TD-DFT calculations were performed for the optimized geometries at the B3LYP/6-31+G(d) level.

### *Photophysical measurements*

Room-temperature UV–vis absorption spectra were measured with a HITACHI U-2910 spectrophotometer. Photoluminescence spectra were measured with HORIBA FluoroMax-4 spectrophotometer. Diffuse reflection spectra of solids were measured with a Shimadzu UV-3600 plus spectrometer and converted to absorption spectra by the Kubelka–Munk theory.

### *Electrochemical measurements*

Cyclic voltammetry measurements were performed with an AMETEK VersaSTAT 4 potentiostat/galvanostat in a 1.0 mM solution in dichloromethane containing 0.1 M nBu<sub>4</sub>NPF<sub>6</sub> at a 100 mV s<sup>-1</sup> scan rate using a three-electrode system which was composed of a Pt plate as the counter electrode, a Pt wire as the working electrode, and an Ag wire as the pseudo-reference electrode. The potentials were corrected using ferrocene as the internal standard.

### *XRD measurement*

Single crystal X-ray diffraction data were collected at 100 K on a Rigaku XtaLAB Synergy R, DW diffractometer at N-BARD, Hiroshima University, using MoK $\alpha$  radiation monochromated with a multilayered confocal mirror. The

structure was solved by the CrysAlis Pro and expanded using Fourier techniques. Nonhydrogen atoms were refined anisotropically, whereas hydrogen atoms were included but not refined. All other calculations were performed using the OLEX2 program. Graphical crystal structures were generated using Mercury 2022.3.0 (Cambridge Crystallographic Data Centre). Deposition Numbers 2381482 (for **DTCB-SiMe**), 2381483 (for **DTCB-SiPh**), 2381484 (for **DTCB-SiNp**) contain the supplementary crystallographic data for this paper. These data are provided free of charge by the joint Cambridge Crystallographic Data Centre and Fachinformationszentrum Karlsruhe Access Structures service. Powder XRD patterns were obtained on a Rigaku Ultima IV multipurpose X-ray diffraction system.

#### *Determination of the activation energy ( $\Delta G^\ddagger$ ) for the isomerization between the anti-folded conformers*

$\Delta G$  values at 298 K were calculated using the obtained from the Van't Hoff plot derived from variable temperature  $^1\text{H}$  NMR spectra. The activation energy ( $\Delta G^\ddagger$ ) was calculated by the following equation.<sup>[5]</sup>

$$\Delta G^\ddagger = 8.314Tc[22.96 + \log(Tc/\Delta\nu)]$$

$Tc$  is the coalescence temperature.  $\Delta\nu$  is the difference in the chemical shifts of isopropyl groups in Tip group at  $-80\text{ }^\circ\text{C}$  ( $\Delta\nu = 400\text{ Hz}$ ).  $Tc$  was determined to be  $-20\text{ }^\circ\text{C}$  from Figure S11.

#### *Fabrication of PVA film*

PVA (0.1052 g) was dissolved in 3.5 mL of water at  $90\text{ }^\circ\text{C}$ . **DTCB-SiNp** (21.1 mg) was dispersed in methanol and mixed with the PVA solution. The mixed solution was poured into a mold and heated at  $40\text{ }^\circ\text{C}$  overnight to obtain the film.

#### *Synthesis*

##### **Synthesis of 8,8-diphenyl-4,8-dihydrosilino[2,3-b:6,5-b']dithiophene (1-Ph)**

To a solution of 2-bromo-3-((2-bromo-2,3-dihydrothiophen-3-yl)methyl)thiophene (4.03 g, 11.9 mmol) in 25 mL of  $\text{Et}_2\text{O}$  was slowly added 9.02 mL of 2.64 mol/L *n*-BuLi in hexane (23.8 mmol) at  $-80\text{ }^\circ\text{C}$  for 5 min, and the mixture was stirred for 1 h at the temperature. Then 2.60 mL (12.4 mmol) of dichlorodiphenylsilane was added to the mixture at  $-80\text{ }^\circ\text{C}$ . The mixture was warmed to room temperature and stirred overnight. The resulting mixture was hydrolyzed with water and extracted with hexane. The combined organic layer was washed with water then with brine. After drying over anhydrous magnesium sulfate, the solvent was evaporated. The residue was washed with a 10:1 mixture of *n*-hexane/dichloromethane to give 2.36 g (6.56 mmol, 55% yield) of **1-Ph** as an off-white solid.  $^1\text{H}$  NMR (in  $\text{CDCl}_3$ , 500 MHz):  $\delta = 7.71$  (2H, d,  $J = 4.7\text{ Hz}$ , Th), 7.63–7.66 (4H, m, Ph), 7.33–7.42 (6H, m, Ph), 7.20 (2H, d,  $J = 4.7\text{ Hz}$ , Th), 4.37 (2H, s,  $\text{CH}_2$ ).  $^{13}\text{C}$  NMR (in  $\text{CDCl}_3$ , 125 MHz):  $\delta = 149.5$ , 135.6, 134.6, 132.4, 130.1, 129.3, 128.1, 125.0, 32.4. HR-MS (APCI, positive) Calcd for  $\text{C}_{21}\text{H}_{16}\text{S}_2\text{Si}$ :  $M^+$ : 360.04267, Found: 360.04568. m.p.  $142.6\text{--}144.2\text{ }^\circ\text{C}$ .

##### **Synthesis of 8,8-di(naphthalen-1-yl)-4,8-dihydrosilino[2,3-b:6,5-b']dithiophene (1-Np)**

**1-Np** was prepared from 2.02 g (5.97 mmol) of 2-bromo-3-((2-bromo-2,3-dihydrothiophen-3-yl)methyl)thiophene, 4.40 mL (12.1 mmol) of 2.76 mol/L *n*-BuLi in hexane, and 2.10 g (5.93 mmol) of dichlorodi(1-naphthyl)silane in 30 mL of  $\text{Et}_2\text{O}$  in a manner similar to that above. The product was obtained as a light brown solid (1.89 g, 4.09 mmol, 69% yield).  $^1\text{H}$  NMR (in  $\text{CDCl}_3$ , 500 MHz):  $\delta = 8.06\text{--}8.09$  (2H, dd,  $J = 8.5, 0.4\text{ Hz}$ , Np), 7.91 (2H, d,  $J = 8.2\text{ Hz}$ ,

Np), 7.80–7.84 (4H, m, Np), 7.64 (2H, d,  $J = 4.7$  Hz, Th), 7.38–7.43 (4H, m, Np), 7.21 (2H, d,  $J = 4.7$  Hz, Th), 4.42 (2H, s, CH<sub>2</sub>). <sup>13</sup>C NMR (in CDCl<sub>3</sub>, 125 MHz):  $\delta = 149.2, 136.8, 136.4, 133.6, 133.5, 132.3, 131.2, 129.4, 129.0, 128.9, 126.4, 126.1, 125.8, 125.5, 32.6$ . HR-MS (APCI, positive) Calcd for C<sub>29</sub>H<sub>20</sub>S<sub>2</sub>Si: M<sup>+</sup>: 460.07757, Found: 460.07724. m.p. 199.8–200.9 °C.

#### Synthesis of 8,8-dimethylsilino[2,3-b:6,5-b']dithiophen-4(8H)-one (2-Me)

To a solution of **1-Me** (2.05 g, 8.68 mmol) in 80 mL of glacial acetic acid was added CrO<sub>3</sub> (1.03 g, 10.3 mmol) and heated at 75 °C overnight. The resulting mixture was hydrolyzed with water and extracted with CH<sub>2</sub>Cl<sub>2</sub>. The combined organic layer was washed with saturated NaHCO<sub>3</sub>aq then with brine. After drying over anhydrous magnesium sulfate, the solvent was evaporated. The crude product was purified by silica gel chromatography using a 1:1 mixture of *n*-hexane/dichloromethane to give 0.945 g (3.77 mmol, 43% yield) of **2-Me** as a white solid. <sup>1</sup>H NMR (in CDCl<sub>3</sub>, 500 MHz):  $\delta = 7.94$  (2H, d,  $J = 4.8$  Hz, Th), 7.64 (2H, d,  $J = 4.8$  Hz, Th), 0.59 (6H, s). <sup>13</sup>C NMR (in CDCl<sub>3</sub>, 125 MHz):  $\delta = 178.7, 148.3, 144.2, 131.5, 129.4, 0.5$ . HR-MS (APCI, positive) Calcd for C<sub>11</sub>H<sub>10</sub>OS<sub>2</sub>Si: [M+H]<sup>+</sup>: 251.00151, Found: 251.00194. m.p. 119.0–120.9 °C.

#### Synthesis of 8,8-diphenylsilino[2,3-b:6,5-b']dithiophen-4(8H)-one (2-Ph)

**2-Ph** was prepared from 1.79 g (4.98 mmol) of **1-Ph** and 0.861 g (8.61 mmol) of CrO<sub>3</sub> in 20 mL of glacial acetic acid at same temperature a manner similar to that above. The product was obtained as a white solid (0.688 g, 2.84 mmol, 37% yield). <sup>1</sup>H NMR (in CDCl<sub>3</sub>, 400 MHz):  $\delta = 8.01$  (2H, d,  $J = 4.8$  Hz, Th), 7.72 (2H, d,  $J = 4.8$  Hz, Th), 7.62–7.66 (4H, m, Ph), 7.37–7.49 (6H, m, Ph). <sup>13</sup>C NMR (in CDCl<sub>3</sub>, 125 MHz):  $\delta = 178.5, 149.3, 140.5, 135.5, 132.8, 131.6, 131.0, 129.5, 128.5$ . HR-MS (APCI, positive) Calcd for C<sub>21</sub>H<sub>14</sub>OS<sub>2</sub>Si: [M+H]<sup>+</sup>: 375.03281, Found: 375.03284. m.p. 169.9–171.2 °C.

#### Synthesis of 8,8-di(naphthalen-1-yl)silino[2,3-b:6,5-b']dithiophen-4(8H)-one (2-Np)

**2-Np** was prepared from 1.03 g (2.23 mmol) of **1-Np** and 0.338 g (3.38 mmol) of CrO<sub>3</sub> in 110 mL of glacial acetic acid at 100 °C in a manner similar to that above. The product was obtained as a white solid (0.621 g, 1.31 mmol, 59% yield). <sup>1</sup>H NMR (in CDCl<sub>3</sub>, 500 MHz):  $\delta = 8.02$ – $8.06$  (4H, overlapped), 7.97 (2H, d,  $J = 8.4$  Hz, Np), 7.88 (2H, d,  $J = 8.1$  Hz Np), 7.84 (2H, dd,  $J = 6.9, 1.3$  Hz, Np), 7.64 (2H, d,  $J = 4.9$  Hz, Th), 7.41–7.49 (4H, m, Np), 7.31 (2H, ddd,  $J = 8.3, 6.9, 1.4$  Hz, Np). <sup>13</sup>C NMR (in CDCl<sub>3</sub>, 125 MHz):  $\delta = 178.7, 148.9, 141.6, 136.6, 136.5, 133.7, 132.7, 132.1, 131.0, 129.7, 129.4, 128.3, 126.7, 126.2, 125.6$ . HR-MS (APCI, positive) Calcd for C<sub>29</sub>H<sub>18</sub>OS<sub>2</sub>Si: [M+H]<sup>+</sup>: 475.06411, Found: 475.06409. m.p. 284.4–286.2 °C.

#### Synthesis of 8,8-dimethylsilino[2,3-b:6,5-b']dithiophene-4(8H)-thione (3-Me)

To a solution of **2-Me** (0.850 g, 3.39 mmol) in 45 mL of toluene was added Lawesson's reagent (0.798 g, 1.97 mmol), and the mixture was refluxed for 5 h. The solvent was removed, and the crude product was purified by silica gel chromatography using *n*-hexane to give 0.636 g (2.39 mmol, 70% yield) of **3-Me** as a green solid. <sup>1</sup>H NMR (in CDCl<sub>3</sub>, 500 MHz):  $\delta = 8.20$  (2H, d,  $J = 4.9$  Hz, Th), 7.51 (2H, d,  $J = 4.9$  Hz, Th), 0.58 (6H, s, Me). <sup>13</sup>C NMR (in CDCl<sub>3</sub>, 125 MHz):  $\delta = 211.1, 154.1, 138.2, 133.4, 130.2, 0.2$ . HR-MS (APCI, positive) Calcd for C<sub>11</sub>H<sub>10</sub>S<sub>3</sub>Si: [M+H]<sup>+</sup>: 266.97867,

Found: 266.97897. m.p. 109.1-110.8 °C.

#### Synthesis of 8,8-diphenylsilino[2,3-b:6,5-b']dithiophene-4(8H)-thione (3-Ph)

**3-Ph** was prepared from 0.528 g (1.41 mmol) of **2-Ph** and 0.318 g (0.786 mmol) of Lawesson's reagent in 20 mL of toluene in a manner similar to that above. The product was obtained as a green solid (0.458 g, 1.17 mmol, 83% yield). <sup>1</sup>H NMR (in CDCl<sub>3</sub>, 400 MHz): δ = 8.29 (d, *J* = 4.9 Hz, 2H, Th), 7.69 (m, 4H, Ph), 7.57 (d, *J* = 4.9 Hz, 2H, Th), 7.38–7.51 (m, 6H, Ph). <sup>13</sup>C NMR (in CDCl<sub>3</sub>, 100 MHz): δ = 211.0, 155.2, 135.6, 134.4, 133.6, 131.6, 131.4, 131.0, 128.5. HR-MS (APCI, positive) Calcd for C<sub>21</sub>H<sub>14</sub>S<sub>2</sub>Si: [M+H]<sup>+</sup>: 391.00997, Found: 391.00928. m.p. 185.6-186.8 °C.

#### Synthesis of 8,8-di(naphthalen-1-yl)silino[2,3-b:6,5-b']dithiophene-4(8H)-thione (3-Np)

**3-Np** was prepared from 0.159 g (0.334 mmol) of **2-Np** and 0.153 g (0.377 mmol) of Lawesson's reagent in 20 mL of toluene in a manner similar to that above. The product was obtained as a green solid (0.103 g, 0.209 mmol, 57% yield). <sup>1</sup>H NMR (in CDCl<sub>3</sub>, 500 MHz): δ = 8.28 (2H, s, *J* = 4.9 Hz Th), 8.01 (2H, d, *J* = 8.3 Hz, Np), 7.97 (2H, d, *J* = 8.2 Hz, Np), 7.88 (2H, d, *J* = 8.0 Hz Np), 7.82 (2H, dd, *J* = 6.9, 1.2 Hz, Np), 7.50 (2H, s, *J* = 4.9 Hz, Th), 7.41–7.47 (4H, m, Np), 7.31 (2H, ddd, *J* = 8.3, 6.9, 1.3 Hz, Np). <sup>13</sup>C NMR (in CDCl<sub>3</sub>, 125 MHz): δ = 211.0, 154.8, 136.6, 136.7, 135.3, 133.7, 132.1, 131.3, 130.7, 129.4, 128.4, 126.6, 126.2, 125.6. One peak was not observed probably due to overlapping. HR-MS (APCI, positive) Calcd for C<sub>29</sub>H<sub>18</sub>S<sub>3</sub>Si: [M+H]<sup>+</sup>: 491.04127, Found: 491.04123. m.p. 268.8-270.3 °C.

#### Synthesis of (8,8-dimethylsilino[2,3-b:6,5-b']dithiophen-4(8H)-ylidene)hydrazine (4-Me)

To a solution of **3-Me** (0.165 g, 0.618 mmol) in 15 mL of EtOH was added hydrazine monohydrate (0.20 mL, 4.20 mmol) and the mixture was refluxed for 80 min. The mixture was filtered, and the solvent of filtrate was removed to give 0.161 g (0.608 mmol, 98% yield) of **4-Me** as a pale yellowish solid. <sup>1</sup>H NMR (in CDCl<sub>3</sub>, 500 MHz): δ = 8.13 (1H, d, *J* = 4.7 Hz, Th), 7.76 (1H, d, *J* = 4.7 Hz Th), 7.68 (1H, s, *J* = 4.7 Hz, Th), 7.56 (1H, d, *J* = 4.7 Hz, Th), 5.82 (2H, s, NH<sub>2</sub>), 0.53 (6H, s, Me). <sup>13</sup>C NMR (in CDCl<sub>3</sub>, 125 MHz): δ = 150.1, 140.6, 140.0, 138.6, 131.2, 130.9, 130.4, 127.9, 127.5, 0.8. HR-MS (APCI, positive) Calcd for C<sub>11</sub>H<sub>12</sub>N<sub>2</sub>S<sub>2</sub>Si: [M+H]<sup>+</sup>: 265.02839, Found: 265.02869. m.p. 102.5-104.7 °C.

#### Synthesis of (8,8-diphenylsilino[2,3-b:6,5-b']dithiophen-4(8H)-ylidene)hydrazine (4-Ph)

**4-Ph** was prepared from 0.298 g (0.763 mmol) of **3-Ph** and 0.390 mL (8.20 mmol) of hydrazine monohydrate in 15 mL of EtOH in a manner similar to that above. The product was obtained as a white solid (0.255 g, 0.656 mmol, 86% yield). <sup>1</sup>H NMR (in CDCl<sub>3</sub>, 400 MHz): δ = 8.21 (1H, d, *J* = 4.8 Hz, Th), 7.83 (1H, d, *J* = 4.8 Hz, Th), 7.79 (1H, d, *J* = 4.8 Hz, Th), 7.65 (1H, d, *J* = 4.8 Hz, Th), 7.59–7.63 (4H, m, Ph), 7.34–7.46 (6H, m, Ph), 5.88 (2H, s, NH<sub>2</sub>). <sup>13</sup>C NMR (in CDCl<sub>3</sub>, 100 MHz): δ = 151.8, 141.1, 140.1, 135.6, 135.2, 133.2, 132.6, 132.2, 130.4, 128.2, 128.1, 127.8, 126.5. HR-MS (APCI, positive) Calcd for C<sub>21</sub>H<sub>16</sub>N<sub>2</sub>S<sub>2</sub>Si: M<sup>+</sup>: 388.05242, Found: 388.05231. m.p. 160.7-163.0 °C.

#### Synthesis of 4-diazo-8,8-dimethyl-4,8-dihydrosilino[2,3-b:6,5-b']dithiophene (5-Me)

To a solution of **4-Me** (0.124 g, 0.469 g) in 10 mL of Et<sub>2</sub>O added anhydrous magnesium sulfate (0.549 g, 4.56 mmol),

Ag<sub>2</sub>O (0.174 g, 0.751 mmol), and five drops saturated potassium hydroxide methanol solution at -10 °C. The mixture was stirred at room temperature for 2 h while shaded from light. The solution was removed to give 0.0994 g (0.379 mmol, 81% yield) of **5-Me** as a dark reddish oil. This compound was immediately used in the next reaction. <sup>1</sup>H NMR (in CDCl<sub>3</sub>, 500 MHz): δ = 7.76 (2h, d, *J* = 4.8 Hz, Th), 6.99 (2H, d, *J* = 4.8 Hz, Th), 0.57 (s, 6H, Me). <sup>13</sup>C NMR spectra could not be obtained due to the low stability. HR-MS (FD, positive) Calcd for C<sub>11</sub>H<sub>10</sub>N<sub>2</sub>S<sub>2</sub>Si: M<sup>+</sup>: 262.00492, Found: 262.00480. IR: Figure S41.

#### Synthesis of 4-diazo-8,8-diphenyl-4,8-dihydrosilino[2,3-b:6,5-b']dithiophene (**5-Ph**)

**5-Ph** was prepared from 0.173 g (0.446 mmol) of **4-Ph**, 0.800 g (6.65 mmol) of anhydrous magnesium sulfate, 0.161 g (0.695 mmol) of Ag<sub>2</sub>O, and seven drops saturated potassium hydroxide methanol solution in 15 mL of Et<sub>2</sub>O in a manner similar to that above. The <sup>1</sup>H NMR spectrum of the reaction solution suggested the formation of the target product, but it was decomposed during the evaporation of the solvent. <sup>1</sup>H NMR (in CDCl<sub>3</sub>, 400 MHz): δ = 7.90 (2H, d, *J* = 4.8 Hz, Th), 7.76 (2H, d, *J* = 4.8 Hz, Th), 7.60–7.64 (4H, m, Ph), 7.36–7.48 (6H, m, Ph).

#### Synthesis of (8-(2,4,6-triisopropylphenyl)borinino[2,3-b:6,5-b']dithiophen-4(8H)-ylidene)hydrazine (**7**)

To a solution of **6** (0.214 g, 0.506 mmol) in 20 mL of EtOH was added hydrazine monohydrate (0.16 mL, 3.36 mmol) and the mixture was refluxed for 90 min. The mixture was filtered, and the solvent of filtrate was removed. The crude product was purified by silica gel chromatography using a 1:10 mixture of n-hexane/dichloromethane to give 0.176 g (0.419 mmol, 83% yield) of **7** as a yellowish solid. <sup>1</sup>H NMR (in CDCl<sub>3</sub>, 500 MHz): δ = 8.14 (1H, d, *J* = 4.9 Hz, Th), 7.94 (1H, d, *J* = 4.9 Hz, Th), 7.91 (1H, d, *J* = 4.9 Hz, Th), 7.75 (1H, d, *J* = 4.9 Hz, Th), 7.06 (2H, s, Tip), 6.62 (2H, s, NH<sub>2</sub>), 2.98 (1H, quint, *J* = 6.9 Hz, Tip), 2.53 (2H, quint, *J* = 6.7 Hz, Tip), 1.35 (6H, d, *J* = 6.9 Hz, Tip), 1.14 (6H, d, *J* = 6.7 Hz, Tip) 1.12 (6H, d, *J* = 6.7 Hz, Tip). <sup>13</sup>C NMR (in CDCl<sub>3</sub>, 125 MHz): δ = 150.9, 150.5, 148.9, 139.2, 137.9, 136.6, 135.8, 127.6, 126.4, 120.2, 35.7, 34.4, 24.9, 24.6, 24.2. Three signals for B–C were not detected, probably due to its low intensity as a result of quadrupolar broadening. <sup>11</sup>B NMR (in CDCl<sub>3</sub>, 160 MHz): δ = 50.1. HR-MS (APCI, positive) Calcd for C<sub>24</sub>H<sub>29</sub>BN<sub>2</sub>S<sub>2</sub>: [M+H]<sup>+</sup>: 421.19380, Found: 421.19366. m.p. 206.3–208.4 °C (decomp.).

#### Synthesis of 4-diazo-8-(2,4,6-triisopropylphenyl)-4,8-dihydroborinino[2,3-b:6,5-b']dithiophene (**8**)

To a solution of **7** (0.176 g, 0.419 mmol) in 45 mL of CH<sub>2</sub>Cl<sub>2</sub> was cooled at 0 °C and added anhydrous magnesium sulfate (0.791 g, 6.57 mmol), MnO<sub>2</sub> (1.09 g, 12.6 mmol), and KOH (0.433 g, 7.71 mmol). The mixture was stirred at same temperature overnight while shaded from light. The solution was removed to give 0.164 g (0.392 mmol, 94% yield) of **8** as a reddish solid. This compound was immediately used in the next reaction. <sup>1</sup>H NMR (in CDCl<sub>3</sub>, 500 MHz): δ = 1.12 (12H, d, *J* = 6.8 Hz, Tip), 1.37 (6H, d, *J* = 6.9 Hz, Tip), 2.55 (2H, quint, *J* = 6.7 Hz, Tip), 3.00 (1H, quint, *J* = 7.0 Hz, Tip), 7.08 (2H, s, Tip), 7.34 (2H, d, *J* = 5.0 Hz, Th), 7.93 (2H, d, *J* = 5.0 Hz, Th). <sup>13</sup>C NMR spectra were not obtained due to difficulty in purifying **8**. <sup>11</sup>B NMR (in CDCl<sub>3</sub>, 160 MHz): δ = 45.5. HR-MS (ESI, positive) Calcd for C<sub>24</sub>H<sub>27</sub>BN<sub>2</sub>S<sub>2</sub>: [M+H]<sup>+</sup>: 419.17815, Found: 419.17804. decomp. 132.2 °C. IR: Figure S47.

### Synthesis of DTCB-SiMe

To a solution of **5-Me** (0.124 g, 0.472 mmol) and **6** (0.211 g, 0.498 mmol) in 15 mL of benzene was added PPh<sub>3</sub> (0.136 g, 0.519 mmol) and refluxed for 2 h. The solution was removed and the crude was purified by silica gel chromatography using a 1:1 mixture of n-hexane/dichloromethane to give 0.176 g (0.282 mmol, 60% yield) of **DTCB-SiMe** as a yellowish-green solid. <sup>1</sup>H NMR (in CDCl<sub>3</sub>, 500 MHz): δ = 7.39 (2H, d, *J* = 4.9 Hz, Th), 7.35 (2H, d, *J* = 4.7 Hz, Th), 7.08 (2H, d, *J* = 4.7 Hz, Th), 7.05 (2H, s, Tip), 7.00 (2H, d, *J* = 4.9 Hz, Th), 2.98 (1H, quint, *J* = 6.9 Hz, Tip), 2.60 (2H, br, Tip), 1.35 (6H, d, *J* = 6.9 Hz, Tip), 1.20 (12H, d, *J* = 6.7 Hz, Tip), 0.68 (6H, s, Me). <sup>13</sup>C NMR (in CDCl<sub>3</sub>, 125 MHz): δ = 152.8, 151.1, 150.4, 148.7, 144.6 (br), 136.5, 136.1 (br), 135.6 (br), 131.8, 131.7, 131.5, 130.1 (br), 129.1, 120.3, 35.8, 34.4, 24.9, 24.3, 0.7. <sup>11</sup>B NMR (in CDCl<sub>3</sub>, 160 MHz): δ = 50.1. HR-MS (APCI, positive) Calcd for C<sub>35</sub>H<sub>37</sub>BS<sub>4</sub>Si: M<sup>+</sup>: 624.16404, Found: 624.16449. m.p. 252.6-256.1 °C.

### Synthesis of DTCB-SiPh

**DTCB-SiPh** was prepared from 0.103 g (0.247 mmol) of **8**, 0.112 g (0.287 mmol) of **3-Ph** and 0.0773 (0.295 mmol) of PPh<sub>3</sub> in 12 mL of benzene in a manner similar to that above. The product was obtained as a yellowish-green solid (0.0660 g, 0.0881 mmol, 36% yield). <sup>1</sup>H NMR (in CDCl<sub>3</sub>, 500 MHz): δ = 7.74 (4H, d, *J* = 6.8 Hz, Ph), 7.40–7.50 (8H, overlapped), 7.37 (2H, d, *J* = 4.9 Hz, Th), 7.19 (2H, br, Th), 7.04 (2H, s, Tip), 7.01 (2H, br, Th), 2.96 (1H, quint, *J* = 6.9 Hz Tip), 2.58 (1H, br, Tip), 1.34 (6H, d, *J* = 6.9 Hz, Tip), 1.18 (12H, d, *J* = 6.7 Hz, Tip). <sup>13</sup>C NMR (in CDCl<sub>3</sub>, 125 MHz): δ = 153.4 (br), 151.0 (br), 150.4, 148.7, 144.6 (br), 136.0 (B-C), 135.8, 135.1 (br), 133.5, 132.62, 132.56 (br), 131.8, 131.6, 131.1 (br), 130.7, 130.3, 128.4, 120.3, 35.8, 34.4, 24.9, 24.2. <sup>11</sup>B NMR (in CDCl<sub>3</sub>, 160 MHz): δ = 50.5. HR-MS (APCI, positive) Calcd for C<sub>45</sub>H<sub>41</sub>BS<sub>4</sub>Si: M<sup>+</sup>: 748.19534, Found: 748.19653. m.p. 284.1-285.9 °C.

### Synthesis of DTCB-SiNp

**DTCB-SiNp** was prepared from 0.235 g (0.561 mmol) of **8**, 0.256 g (0.522 mmol) of **3-Np** and 0.143 (0.545 mmol) of PPh<sub>3</sub> in 40 mL of benzene in a manner similar to that above. The product was obtained as a yellowish-green solid (0.123 g, 0.144 mmol, 28% yield). <sup>1</sup>H NMR (in CDCl<sub>3</sub>, 500 MHz): δ = 7.98 (d, *J* = 8.2 Hz, Np), 7.90 (4H, overlapped), 7.41–7.48 (4H, m, Np), 7.39 (2H, d, *J* = 4.7 Hz, Th), 7.33 (2H, d, *J* = 4.8 Hz, Th), 7.28 (2H, br, Np), 7.10 (2H, d, *J* = 4.7 Hz, Th), 7.03 (2H, s, Tip), 6.86 (2H, br, Th), 2.96 (1H, p, *J* = 6.9 Hz, Tip), 2.55 (2H, br, Tip), 1.33 (6H, d, *J* = 6.9 Hz, Tip), 1.17 (12H, d, *J* = 6.7 Hz, Tip). <sup>13</sup>C NMR (in CDCl<sub>3</sub>, 125 MHz): δ = 153.4, 151.4, 150.3, 148.7, 144.5 (br), 137.5 (br), 137.1, 135.9 (br), 134.7, 134.4 (br), 133.7, 131.93, 131.89 (br), 131.7, 131.6, 130.6, 130.4 (br), 129.2, 126.2, 125.9, 125.5, 120.3, 35.8, 34.4, 24.8, 24.2. One peak was not observed probably due to overlapping. <sup>11</sup>B NMR (in CDCl<sub>3</sub>, 160 MHz): δ = 51.1. HR-MS (APCI, positive) Calcd for C<sub>53</sub>H<sub>45</sub>BS<sub>4</sub>Si: M<sup>+</sup>: 848.22664, Found: 848.22742. m.p. >300 °C (decomp).

### Supporting figures and tables

**Table S1** DFT-calculated Gibbs free energies of BAEs at the B3LYP/6-31G(d) level at 298 K.

| Compound         | Conformer           | $G^{\text{DFT}} / \text{kJ mol}^{-1}$ | $\Delta G^{\text{DFT}} [\text{a}] / \text{kJ mol}^{-1}$ |
|------------------|---------------------|---------------------------------------|---------------------------------------------------------|
| Bianthrone       | <i>anti</i> -folded | -3220838.80                           | +10.1                                                   |
|                  | twisted             | -3220828.70                           |                                                         |
| Bifluorelynydene | <i>anti</i> -folded | -2625764.09                           | -40.4                                                   |
|                  | twisted             | -2625804.51                           |                                                         |
| Biacridinylidene | <i>anti</i> -folded | -3122617.76                           | +37.9                                                   |
|                  | twisted             | -3122579.82                           |                                                         |
| <b>FA</b>        | <i>anti</i> -folded | -2874204.94                           | +4.9                                                    |
|                  | twisted             | -2874200.00                           |                                                         |
| <b>dDTCB</b>     | <i>anti</i> -folded | -12650506.85                          | -38.4                                                   |
|                  | twisted             | -12650544.90                          |                                                         |

[a]  $\Delta G = G(\text{twisted}) - G(\text{anti-folded})$ .

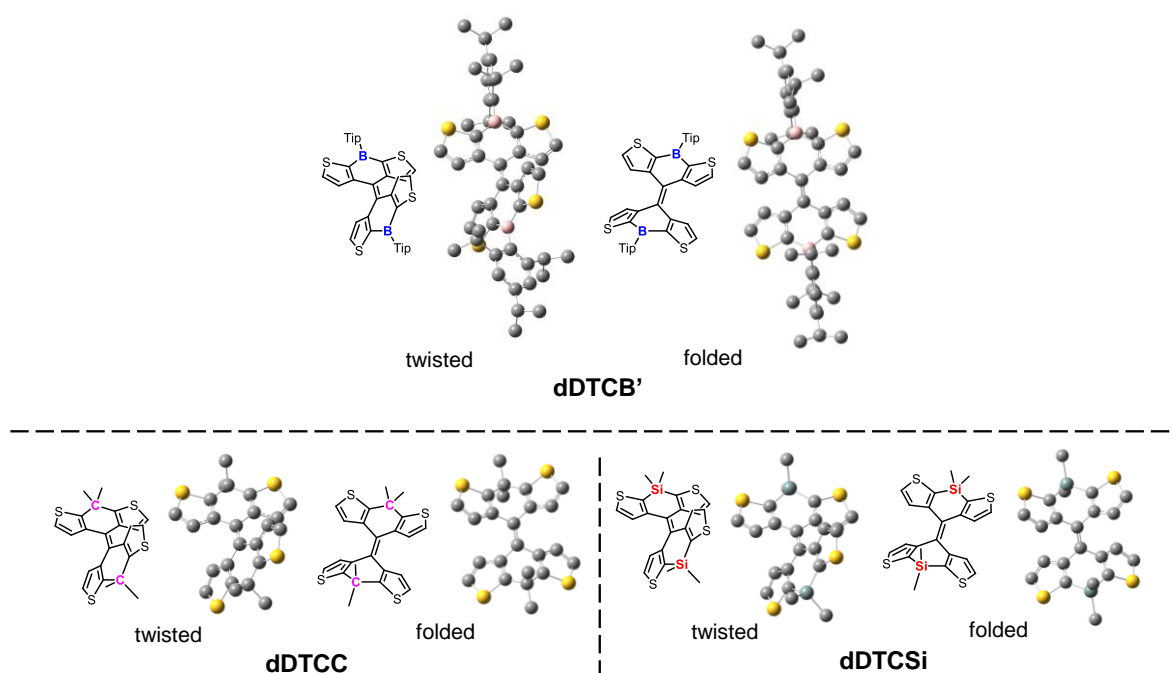

**Figure S1** Optimized structures of conformational isomers of **dDTCB'**, **dDTCC**, and **dDTCSi** at the B3LYP/6-31G(d) level. Hydrogen atoms are omitted for clarity.



**Table S2** Calculated geometrical parameters of **dDTCC** and **dDTCSi** at the B3LYP/6-31G(d) level of theory.

| Compound     | Conformer           | Bond length / Å |                 |       | Dihedral angle <sup>[a]</sup> / ° |      | Torsions / °                                              |                             |
|--------------|---------------------|-----------------|-----------------|-------|-----------------------------------|------|-----------------------------------------------------------|-----------------------------|
|              |                     | C1-X/<br>C2-X   | C9-X/<br>C10-X  | C4-C7 | A-B                               | C-D  | $\tau(\text{C3-C4-C7-C6})/$<br>$\tau(\text{C5-C4-C7-C8})$ | $\omega$ <sup>[b]</sup> / ° |
| <b>dDTCC</b> | <i>anti</i> -folded | 1.521/<br>1.521 | 1.521/<br>1.521 | 1.370 | 43.5                              | 43.5 | -1.2/1.2                                                  | 0                           |
|              |                     | 1.514/<br>1.514 | 1.514/<br>1.514 | 1.400 | 0.3                               | 0.3  | 43.9/43.9                                                 | 43.9                        |
|              | <i>anti</i> -folded | 1.873/<br>1.873 | 1.873/<br>1.873 | 1.370 | 48.0                              | 48.0 | 0.6/-0.6                                                  | 0                           |
|              |                     | 1.861/<br>1.861 | 1.861/<br>1.861 | 1.416 | 6.3                               | 6.3  | 49.3/49.3                                                 | 49.3                        |

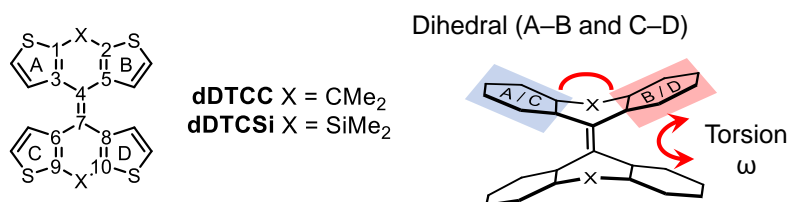

<sup>[a]</sup> Dihedral angle between the two mean planes (A-B and C-D) is defined as the dihedral angle between the least-square planes of the atoms in the thiophene rings of each tricyclic structure. <sup>[b]</sup> Torsion angle ( $\omega$ ) around C4=C7 is defined as the absolute value of average of the dihedral angles ( $\tau(\text{C3-C4-C7-C6})$  and  $\tau(\text{C5-C4-C7-C8})$ ).

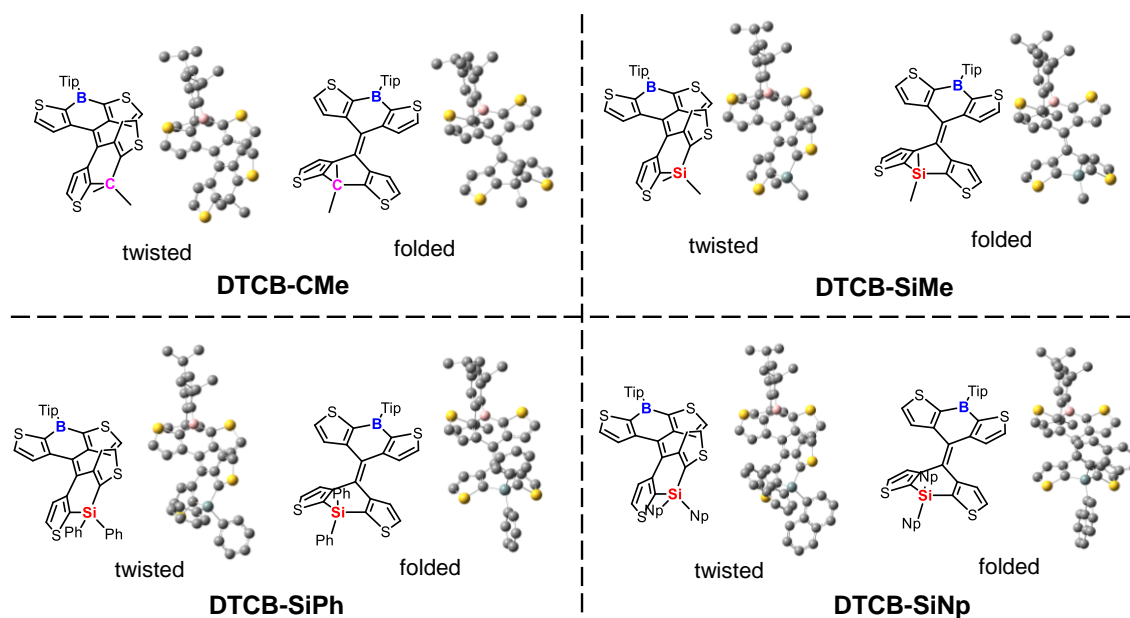**Figure S2** Optimized structures of conformational isomers of **DTCB-CMe**, **DTCB-SiMe**, **DTCB-SiPh**, and **DTCB-SiNp** at the B3LYP/6-31G(d) level. Hydrogen atoms are omitted for clarity.

**Table S3** Calculated geometrical parameters of **DTCB-CMe**, **DTCB-SiMe**, **DTCB-SiPh** and **DTCB-SiNp** at the B3LYP/6-31G(d) level of theory.

| Compound         | Conformer           | Bond length /Å  |                 |       | Dihedral angle <sup>[a]</sup> /° |      | Torsions /°                                   | $\omega$ <sup>[b]</sup> /° |
|------------------|---------------------|-----------------|-----------------|-------|----------------------------------|------|-----------------------------------------------|----------------------------|
|                  |                     | C1-B/<br>C2-B   | C9-X/<br>C10-X  | C4-C7 | A-B                              | C-D  | $\tau$ (C3-C4-C7-C6)/<br>$\tau$ (C5-C4-C7-C8) |                            |
| <b>DTCB-CMe</b>  | <i>anti</i> -folded | 1.538/<br>1.538 | 1.522/<br>1.522 | 1.378 | 32.1                             | 49.0 | -2.7/2.7                                      | 0                          |
|                  | twisted             | 1.529/<br>1.529 | 1.512/<br>1.512 | 1.413 | 2.5                              | 0.8  | 46.7/46.7                                     | 46.7                       |
| <b>DTCB-SiMe</b> | <i>anti</i> -folded | 1.538/<br>1.538 | 1.878/<br>1.878 | 1.376 | 29.9                             | 55.8 | -1.8/1.8                                      | 0                          |
|                  | twisted             | 1.530/<br>1.530 | 1.863/<br>1.863 | 1.419 | 1.9                              | 6.2  | 49.3/49.3                                     | 49.3                       |
| <b>DTCB-SiPh</b> | <i>anti</i> -folded | 1.538/<br>1.538 | 1.876/<br>1.876 | 1.375 | 30.2                             | 55.6 | -1.8/1.8                                      | 0                          |
|                  | twisted             | 1.530/<br>1.530 | 1.864/<br>1.864 | 1.419 | 2.0                              | 6.8  | 49.2/49.2                                     | 49.2                       |
| <b>DTCB-SiNp</b> | <i>anti</i> -folded | 1.539/<br>1.538 | 1.879/<br>1.883 | 1.375 | 30.3                             | 54.8 | -2.8/0.8                                      | 1.0                        |
|                  | twisted             | 1.530/<br>1.530 | 1.865/<br>1.874 | 1.420 | 1.9                              | 8.0  | 49.4/49.1                                     | 49.3                       |

[a] Dihedral angle between the two mean planes (A–B and C–D) is defined as the dihedral angle between the least-square planes of the atoms in the thiophene rings of each tricyclic structure. [b] Torsion angle ( $\omega$ ) around C4=C7 is defined as the absolute value of average of the dihedral angles ( $\tau$ C3–C4–C7–C6) and  $\tau$ (C5–C4–C7–C8).

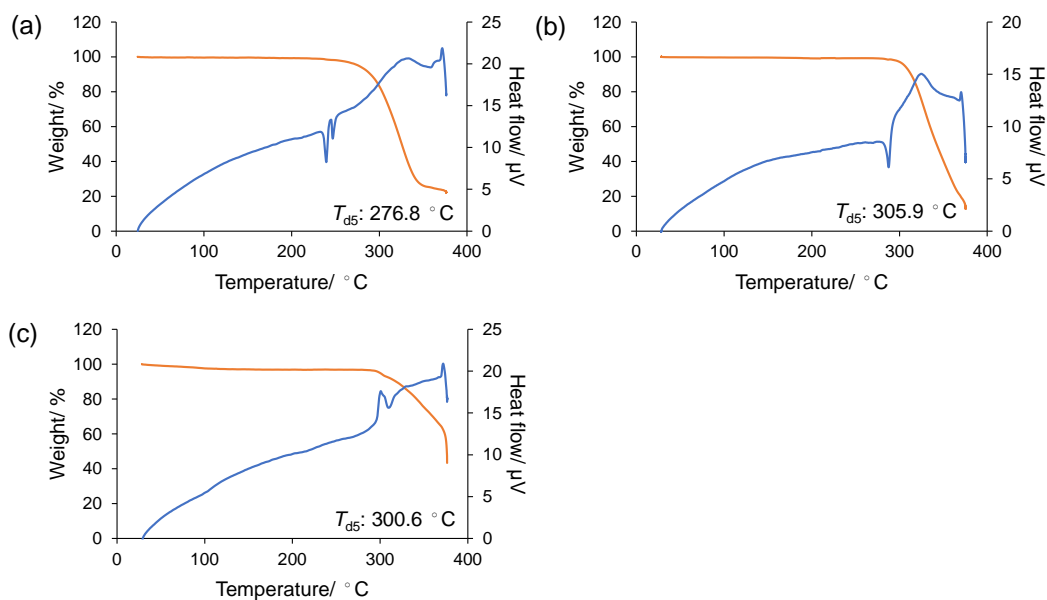

**Figure S3** TG-DTA curves of (a) **DTCB-SiMe**, (b) **DTCB-SiPh**, and (c) **DTCB-SiNp** at a heating rate of 10 °C/min in air.

**Table S4** Optical properties of **DTCB-SiMe**, **DTCB-SiPh** and **DTCB-SiNp** in toluene.

| Compound         | $\lambda^{\text{abs}}(\text{max}) / \text{nm}$ | $\lambda^{\text{PL}}(\text{max})^{[\text{a}]} / \text{nm}$ |
|------------------|------------------------------------------------|------------------------------------------------------------|
| <b>DTCB-SiMe</b> | 596, 399                                       | 470                                                        |
| <b>DTCB-SiPh</b> | 601, 401                                       | 472                                                        |
| <b>DTCB-SiNp</b> | 608, 402                                       | 473                                                        |

[a] excited at the absorption maxima around 400 nm.

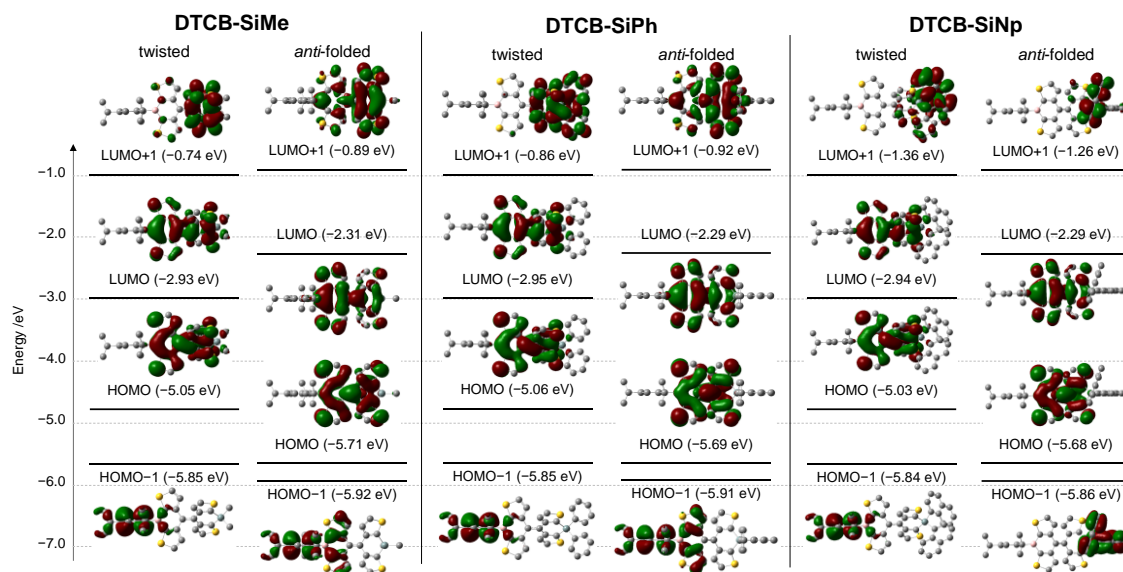

**Figure S4** Kohn–Sham orbitals of the twisted and *anti*-folded conformers of **DTCB-SiMe**, **DTCB-SiPh**, and **DTCB-SiNp** at the B3LYP/6-31G(d) level. Hydrogen atoms are omitted for clarity.

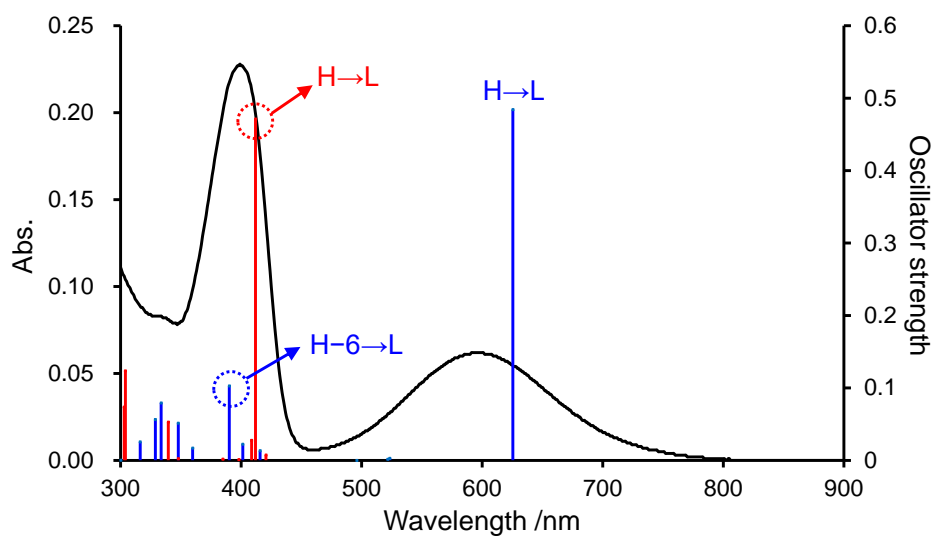

**Figure S5** Experimental absorption spectrum in toluene (black line) and TD-DFT (red line: *anti*-folded, blue line: twisted) results at the B3LYP/6-31+G(d) level for **DTCB-SiMe**. H and L denote HOMO and LUMO, respectively.

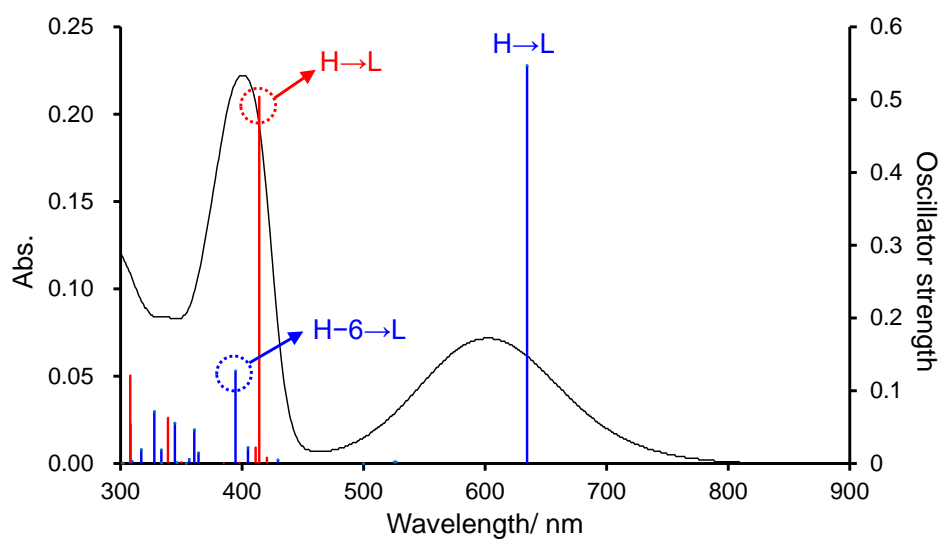

**Figure S6** Experimental absorption spectrum in toluene (black line) and TD-DFT (red line: *anti*-folded, blue line: twisted) results at the B3LYP/6-31+G(d) level for **DTCEB-SiPh**. H and L denote HOMO and LUMO, respectively.

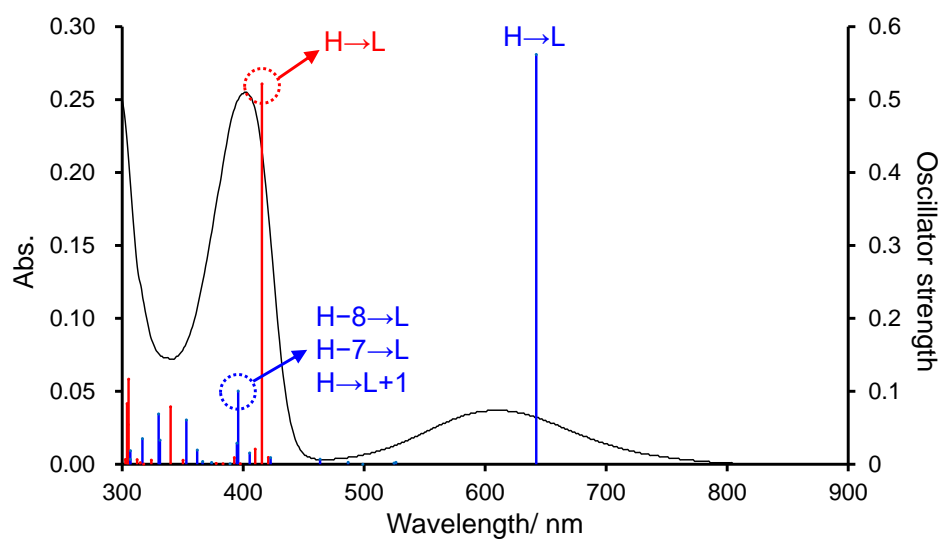

**Figure S7** Experimental absorption spectrum in toluene (black line) and TD-DFT (red line: *anti*-folded, blue line: twisted) results at the B3LYP/6-31+G(d) level for **DTCEB-SiNp**. H and L denote HOMO and LUMO, respectively.

**Table S5** TD-DFT data for the *anti*-folded conformer of **DTCB-SiMe**.

| Excited state                  | Composition <sup>[a]</sup> | CI     | Excitation energy /eV | Wavelength /nm | $f^{[b]}$ |
|--------------------------------|----------------------------|--------|-----------------------|----------------|-----------|
| S <sub>0</sub> →S <sub>1</sub> | H-1→L                      | 0.690  | 2.95                  | 421            | 0.01      |
| S <sub>0</sub> →S <sub>2</sub> | H→L                        | 0.699  | 3.01                  | 412            | 0.47      |
| S <sub>0</sub> →S <sub>3</sub> | H-3→L                      | 0.524  | 3.03                  | 409            | 0.03      |
|                                | H-2→L                      | 0.464  |                       |                |           |
| S <sub>0</sub> →S <sub>7</sub> | H-6→L                      | 0.696  | 3.65                  | 340            | 0.05      |
| S <sub>0</sub> →S <sub>8</sub> | H-9→L                      | 0.105  | 4.08                  | 304            | 0.12      |
|                                | H-7→L                      | 0.545  |                       |                |           |
|                                | H→L+1                      | -0.412 |                       |                |           |
| S <sub>0</sub> →S <sub>9</sub> | H-8→L                      | 0.698  | 4.09                  | 303            | 0.07      |

<sup>[a]</sup> H and L denote HOMO and LUMO, respectively. <sup>[b]</sup> Oscillator strength.

**Table S6** TD-DFT data for the twisted conformer of **DTCB-SiMe**.

| Excited state                   | Composition <sup>[a]</sup> | CI     | Excitation energy /eV | Wavelength /nm | $f^{[b]}$ |
|---------------------------------|----------------------------|--------|-----------------------|----------------|-----------|
| S <sub>0</sub> →S <sub>1</sub>  | H→L                        | 0.712  | 1.98                  | 625            | 0.48      |
|                                 |                            | -0.136 |                       |                |           |
| S <sub>0</sub> →S <sub>5</sub>  | H-5→L                      | -0.164 | 2.98                  | 416            | 0.01      |
|                                 |                            | 0.675  |                       |                |           |
|                                 |                            | 0.114  |                       |                |           |
| S <sub>0</sub> →S <sub>6</sub>  | H-5→L                      | 0.670  | 3.09                  | 401            | 0.02      |
|                                 |                            | 0.178  |                       |                |           |
|                                 |                            | -0.114 |                       |                |           |
| S <sub>0</sub> →S <sub>7</sub>  | H-6→L                      | 0.695  | 3.18                  | 390            | 0.10      |
| S <sub>0</sub> →S <sub>8</sub>  | H-7→L                      | 0.688  | 3.45                  | 360            | 0.02      |
|                                 |                            | -0.117 |                       |                |           |
| S <sub>0</sub> →S <sub>9</sub>  | H-8→L                      | 0.659  | 3.56                  | 348            | 0.05      |
|                                 |                            | 0.235  |                       |                |           |
| S <sub>0</sub> →S <sub>10</sub> | H-8→L                      | -0.238 | 3.72                  | 334            | 0.08      |
|                                 |                            | 0.124  |                       |                |           |
|                                 |                            | 0.643  |                       |                |           |
| S <sub>0</sub> →S <sub>11</sub> | H-9→L                      | -0.215 | 3.77                  | 329            | 0.06      |
|                                 |                            | 0.106  |                       |                |           |
|                                 |                            | 0.653  |                       |                |           |
| S <sub>0</sub> →S <sub>12</sub> | H-9→L                      | -0.261 | 3.92                  | 316            | 0.03      |
|                                 |                            | 0.647  |                       |                |           |

<sup>[a]</sup> H and L denote HOMO and LUMO, respectively. <sup>[b]</sup> Oscillator strength.

**Table S7** TD-DFT data for the *anti*-folded conformer of **DTCB-SiPh**.

| Excited state                  | Composition <sup>[a]</sup> | CI     | Excitation energy /eV | Wavelength /nm | $f^{[b]}$ |
|--------------------------------|----------------------------|--------|-----------------------|----------------|-----------|
| S <sub>0</sub> →S <sub>1</sub> | H-1→L                      | 0.695  | 2.95                  | 420            | 0.01      |
| S <sub>0</sub> →S <sub>2</sub> | H→L                        | 0.699  | 2.99                  | 414            | 0.50      |
| S <sub>0</sub> →S <sub>3</sub> | H-3→L                      | -0.411 | 3.02                  | 411            | 0.02      |
|                                | H-2→L                      | 0.559  |                       |                |           |
| S <sub>0</sub> →S <sub>7</sub> | H-6→L                      | 0.696  | 3.66                  | 339            | 0.06      |
| S <sub>0</sub> →S <sub>8</sub> | H-12→L                     | -0.223 | 4.02                  | 308            | 0.05      |
|                                | H-10→L                     | 0.150  |                       |                |           |
|                                | H-8→L                      | 0.156  |                       |                |           |
|                                | H-7→L                      | 0.627  |                       |                |           |
| S <sub>0</sub> →S <sub>9</sub> | H-11→L                     | 0.141  | 4.03                  | 308            | 0.12      |
|                                | H-9→L                      | 0.564  |                       |                |           |
|                                | H→L+1                      | -0.368 |                       |                |           |

<sup>[a]</sup> H and L denote HOMO and LUMO, respectively. <sup>[b]</sup> Oscillator strength.

**Table S8** TD-DFT data for the twisted conformer of **DTCB-SiPh**.

| Excited state                   | Composition <sup>[a]</sup> | CI     | Excitation energy /eV | Wavelength /nm | $f^{[b]}$ |        |
|---------------------------------|----------------------------|--------|-----------------------|----------------|-----------|--------|
| S <sub>0</sub> →S <sub>1</sub>  | H→L                        | 0.712  | 1.95                  | 634            | 0.55      |        |
|                                 |                            | -0.134 |                       |                |           |        |
| S <sub>0</sub> →S <sub>5</sub>  | H-4→L                      | 0.692  | 2.89                  | 430            | 0.01      |        |
| S <sub>0</sub> →S <sub>6</sub>  | H-5→L                      | 0.687  | 3.06                  | 405            | 0.02      |        |
|                                 |                            | H-4→L  |                       |                |           | -0.102 |
| S <sub>0</sub> →S <sub>7</sub>  | H-6→L                      | 0.695  | 3.14                  | 395            | 0.13      |        |
| S <sub>0</sub> →S <sub>8</sub>  | H-10→L                     | -0.240 | 3.4                   | 364            | 0.01      |        |
|                                 |                            | H-8→L  |                       |                |           | -0.274 |
|                                 |                            | H-7→L  |                       |                |           | 0.593  |
| S <sub>0</sub> →S <sub>9</sub>  | H-12→L                     | 0.101  | 3.44                  | 361            | 0.05      |        |
|                                 |                            | H-11→L |                       |                |           | 0.107  |
|                                 |                            | H-9→L  |                       |                |           | 0.631  |
|                                 |                            | H→L+1  |                       |                |           | -0.256 |
| S <sub>0</sub> →S <sub>10</sub> | H-10→L                     | 0.635  | 3.48                  | 356            | 0.01      |        |
|                                 |                            | H-7→L  |                       |                |           | 0.284  |
| S <sub>0</sub> →S <sub>13</sub> | H-9→L                      | 0.257  | 3.60                  | 345            | 0.06      |        |
|                                 |                            | H→L+1  |                       |                |           | 0.643  |
| S <sub>0</sub> →S <sub>15</sub> | H-12→L                     | 0.691  | 3.72                  | 334            | 0.02      |        |
| S <sub>0</sub> →S <sub>16</sub> | H-13→L                     | -0.155 | 3.78                  | 328            | 0.07      |        |

|                                 |        |        |      |     |      |
|---------------------------------|--------|--------|------|-----|------|
|                                 | H→L+2  | 0.163  |      |     |      |
|                                 | H→L+3  | 0.650  |      |     |      |
|                                 | H→L+5  | 0.116  |      |     |      |
| S <sub>0</sub> →S <sub>17</sub> | H-13→L | 0.241  | 3.91 | 317 | 0.02 |
|                                 | H→L+2  | -0.115 |      |     |      |
|                                 | H→L+3  | 0.640  |      |     |      |

<sup>[a]</sup> H and L denote HOMO and LUMO, respectively. <sup>[b]</sup> Oscillator strength.

**Table S9** TD-DFT data for the *anti*-folded conformer of **DTCB-SiPh**.

| Excited state                   | Composition <sup>[a]</sup> | CI     | Excitation energy /eV | Wavelength /nm | <i>f</i> <sup>[b]</sup> |
|---------------------------------|----------------------------|--------|-----------------------|----------------|-------------------------|
| S <sub>0</sub> →S <sub>1</sub>  | H-4→L                      | 0.118  | 2.95                  | 421            | 0.01                    |
|                                 | H-2→L                      | 0.632  |                       |                |                         |
|                                 | H-1→L                      | 0.273  |                       |                |                         |
| S <sub>0</sub> →S <sub>2</sub>  | H→L                        | 0.697  | 2.98                  | 416            | 0.52                    |
| S <sub>0</sub> →S <sub>3</sub>  | H-4→L                      | 0.457  | 3.02                  | 410            | 0.02                    |
|                                 | H-3→L                      | 0.524  |                       |                |                         |
| S <sub>0</sub> →S <sub>5</sub>  | H-6→L                      | -0.133 | 3.16                  | 393            | 0.01                    |
|                                 | H-5→L                      | 0.114  |                       |                |                         |
|                                 | H-2→L                      | -0.275 |                       |                |                         |
|                                 | H-1→L                      | 0.623  |                       |                |                         |
| S <sub>0</sub> →S <sub>8</sub>  | H-7→L                      | 0.696  | 3.54                  | 350            | 0.01                    |
| S <sub>0</sub> →S <sub>9</sub>  | H-8→L                      | 0.694  | 3.65                  | 340            | 0.08                    |
| S <sub>0</sub> →S <sub>10</sub> | H→L+1                      | 0.670  | 3.83                  | 324            | 0.01                    |
| S <sub>0</sub> →S <sub>13</sub> | H-11→L                     | -0.116 | 3.97                  | 312            | 0.01                    |
|                                 | H-10→L                     | 0.597  |                       |                |                         |
|                                 | H-9→L                      | 0.348  |                       |                |                         |
| S <sub>0</sub> →S <sub>14</sub> | H-10→L                     | 0.152  | 4.06                  | 305            | 0.12                    |
|                                 | H-12→L                     | 0.558  |                       |                |                         |
|                                 | H→L+3                      | 0.340  |                       |                |                         |
| S <sub>0</sub> →S <sub>15</sub> | H-5→L+1                    | -0.125 | 4.07                  | 305            | 0.05                    |
|                                 | H-2→L+1                    | -0.230 |                       |                |                         |
|                                 | H-1→L+1                    | 0.591  |                       |                |                         |
|                                 | H-1→L+2                    | -0.220 |                       |                |                         |
| S <sub>0</sub> →S <sub>16</sub> | H-12→L                     | 0.524  | 4.08                  | 304            | 0.08                    |
|                                 | H-11→L                     | -0.322 |                       |                |                         |
|                                 | H-1→L+2                    | -0.119 |                       |                |                         |
|                                 | H→L+3                      | 0.264  |                       |                |                         |

|                          |         |        |      |     |      |
|--------------------------|---------|--------|------|-----|------|
| $S_0 \rightarrow S_{17}$ | H-12→L  | 0.138  | 4.10 | 303 | 0.01 |
|                          | H-5→L+1 | -0.113 |      |     |      |
|                          | H-5→L+2 | 0.228  |      |     |      |
|                          | H-2→L+2 | -0.221 |      |     |      |
|                          | H-1→L+1 | 0.222  |      |     |      |
|                          | H-1→L+2 | 0.541  |      |     |      |

<sup>[a]</sup> H and L denote HOMO and LUMO, respectively. <sup>[b]</sup> Oscillator strength.

**Table S10** TD-DFT data for the twisted conformer of **DTCB-SiNp**.

| Excited state            | Composition <sup>[a]</sup> | CI     | Excitation energy /eV | Wavelength /nm | $f^{[b]}$ |
|--------------------------|----------------------------|--------|-----------------------|----------------|-----------|
| $S_0 \rightarrow S_1$    | H→L                        | 0.712  | 1.93                  | 642            | 0.56      |
|                          |                            | -0.133 |                       |                |           |
| $S_0 \rightarrow S_6$    | H-5→L                      | 0.700  | 2.67                  | 464            | 0.01      |
| $S_0 \rightarrow S_7$    | H-7→L                      | -0.114 | 2.93                  | 423            | 0.01      |
|                          | H-6→L                      | 0.676  |                       |                |           |
| $S_0 \rightarrow S_8$    | H-7→L                      | 0.643  | 3.06                  | 405            | 0.02      |
|                          | H-6→L                      | 0.153  |                       |                |           |
|                          | H→L+1                      | -0.202 |                       |                |           |
| $S_0 \rightarrow S_9$    | H-8→L                      | 0.584  | 3.13                  | 396            | 0.10      |
|                          | H-7→L                      | -0.188 |                       |                |           |
|                          | H→L+1                      | -0.325 |                       |                |           |
| $S_0 \rightarrow S_{10}$ | H-8→L                      | 0.359  | 3.14                  | 395            | 0.03      |
|                          | H-7→L                      | 0.141  |                       |                |           |
|                          | H→L+1                      | 0.579  |                       |                |           |
| $S_0 \rightarrow S_{14}$ | H-11→L                     | 0.673  | 3.42                  | 362            | 0.02      |
|                          | H-10→L                     | 0.143  |                       |                |           |
|                          | H→L+4                      | -0.108 |                       |                |           |
| $S_0 \rightarrow S_{15}$ | H-12→L                     | 0.689  | 3.50                  | 353            | 0.06      |
|                          | H→L+3                      | 0.116  |                       |                |           |
| $S_0 \rightarrow S_{16}$ | H-12→L                     | -0.112 | 3.74                  | 331            | 0.03      |
|                          | H→L+3                      | 0.668  |                       |                |           |
| $S_0 \rightarrow S_{17}$ | H-13→L                     | -0.207 | 3.76                  | 330            | 0.07      |
|                          | H→L+4                      | 0.648  |                       |                |           |
| $S_0 \rightarrow S_{18}$ | H-13→L                     | -0.228 | 3.91                  | 317            | 0.04      |
|                          | H→L+5                      | 0.436  |                       |                |           |
|                          | H→L+6                      | 0.420  |                       |                |           |
|                          | H→L+7                      | -0.233 |                       |                |           |



|                          |                       |        |      |     |      |
|--------------------------|-----------------------|--------|------|-----|------|
| $S_0 \rightarrow S_{19}$ | H-5 $\rightarrow$ L+1 | -0.108 | 4.04 | 307 | 0.02 |
|                          | H-3 $\rightarrow$ L+1 | 0.493  |      |     |      |
|                          | H-3 $\rightarrow$ L+2 | 0.112  |      |     |      |
|                          | H $\rightarrow$ L+5   | 0.359  |      |     |      |
|                          | H $\rightarrow$ L+6   | -0.289 |      |     |      |
| $S_0 \rightarrow S_{20}$ | H-5 $\rightarrow$ L+1 | -0.134 | 4.04 | 307 | 0.01 |
|                          | H-3 $\rightarrow$ L+1 | 0.427  |      |     |      |
|                          | H-3 $\rightarrow$ L+2 | 0.124  |      |     |      |
|                          | H $\rightarrow$ L+5   | -0.383 |      |     |      |
|                          | H $\rightarrow$ L+6   | 0.333  |      |     |      |

<sup>[a]</sup> H and L denote HOMO and LUMO, respectively. <sup>[b]</sup> Oscillator strength.

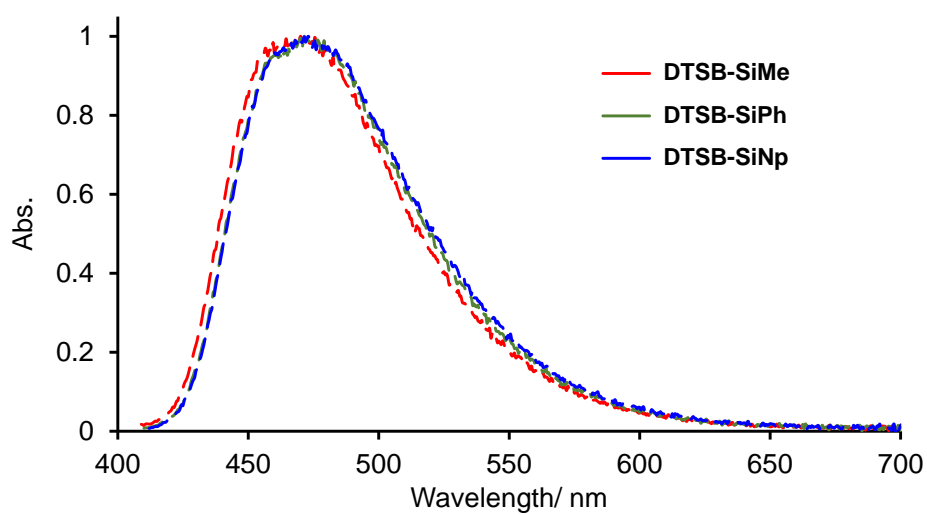

**Figure S8** Photoluminescence spectra of **DTSC-SiMe**, **DTSC-SiPh**, and **DTSC-SiNp** in toluene at the concentration of 10  $\mu\text{mol/L}$ .

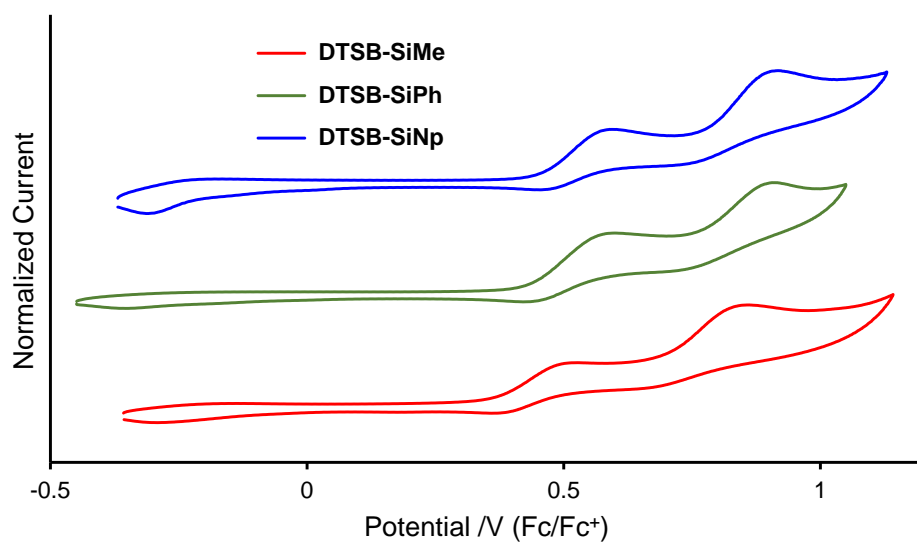

**Figure S9** Anodic cyclic voltammetry data of boron-silicon hybrid BAEs in CH<sub>2</sub>Cl<sub>2</sub> containing 0.1 M Bu<sub>4</sub>NPF<sub>6</sub> at the scan rate of 100 mV/s.

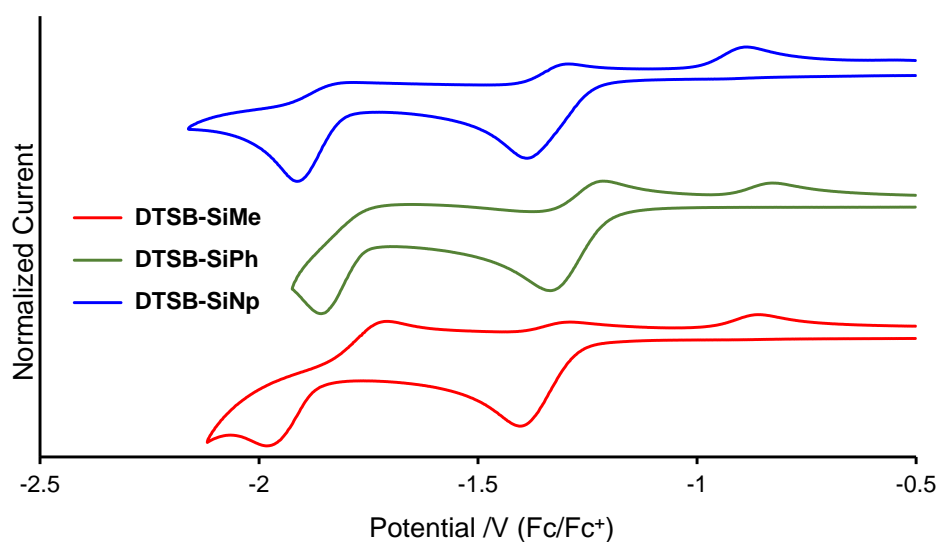

**Figure S10** Cathodic cyclic voltammetry data of boron-silicon hybrid BAEs in CH<sub>2</sub>Cl<sub>2</sub> containing 0.1 M Bu<sub>4</sub>NPF<sub>6</sub> at the scan rate of 100 mV/s.

**Table S11** Optical and electrochemical properties of **DTCB-SiMe**, **DTCB-SiPh**, and **DTCB-SiNp** in solution.

| Compound         | $E_{\text{red}}^{1[\text{a}]}$<br>/V | $E_{\text{red}}^{2[\text{a}]}$<br>/V | $E_{\text{ox}}^{1[\text{a}]}$<br>/V | $E_{\text{ox}}^{2[\text{a}]}$<br>/V | HOMO<br>/eV | LUMO<br>/eV | $E_{\text{g}}^1(\text{CV})^{[\text{b}]}$<br>/eV | $E_{\text{g}}^2(\text{CV})^{[\text{c}]}$<br>/eV | $\lambda_{\text{onset}}^{[\text{d}]}$<br>/nm | $E_{\text{g}}(\text{Opt})^{[\text{e}]}$<br>/eV |
|------------------|--------------------------------------|--------------------------------------|-------------------------------------|-------------------------------------|-------------|-------------|-------------------------------------------------|-------------------------------------------------|----------------------------------------------|------------------------------------------------|
| <b>DTCB-SiMe</b> | -1.38                                | -1.77                                | 0.36                                | 0.59                                | -5.16       | -3.43       | 1.74                                            | 2.36                                            | 724                                          | 1.71                                           |
| <b>DTCB-SiPh</b> | -1.20                                | -1.71                                | 0.44                                | 0.65                                | -5.24       | -3.60       | 1.64                                            | 2.36                                            | 727                                          | 1.71                                           |
| <b>DTCB-SiNp</b> | -1.24                                | -1.78                                | 0.46                                | 0.71                                | -5.26       | -3.56       | 1.70                                            | 2.49                                            | 753                                          | 1.65                                           |

<sup>[a]</sup> Onset potential as  $\text{Fc}/\text{Fc}^{0/+}$ ; <sup>[b]</sup>  $E_{\text{g}}^1(\text{CV}) = E_{\text{ox}}^1 - E_{\text{red}}^1$ ; <sup>[c]</sup>  $E_{\text{g}}^2(\text{CV}) = E_{\text{ox}}^2 - E_{\text{red}}^2$ ; <sup>[d]</sup> Absorption onset in toluene; <sup>[e]</sup> Obtained from the absorption onset in toluene.

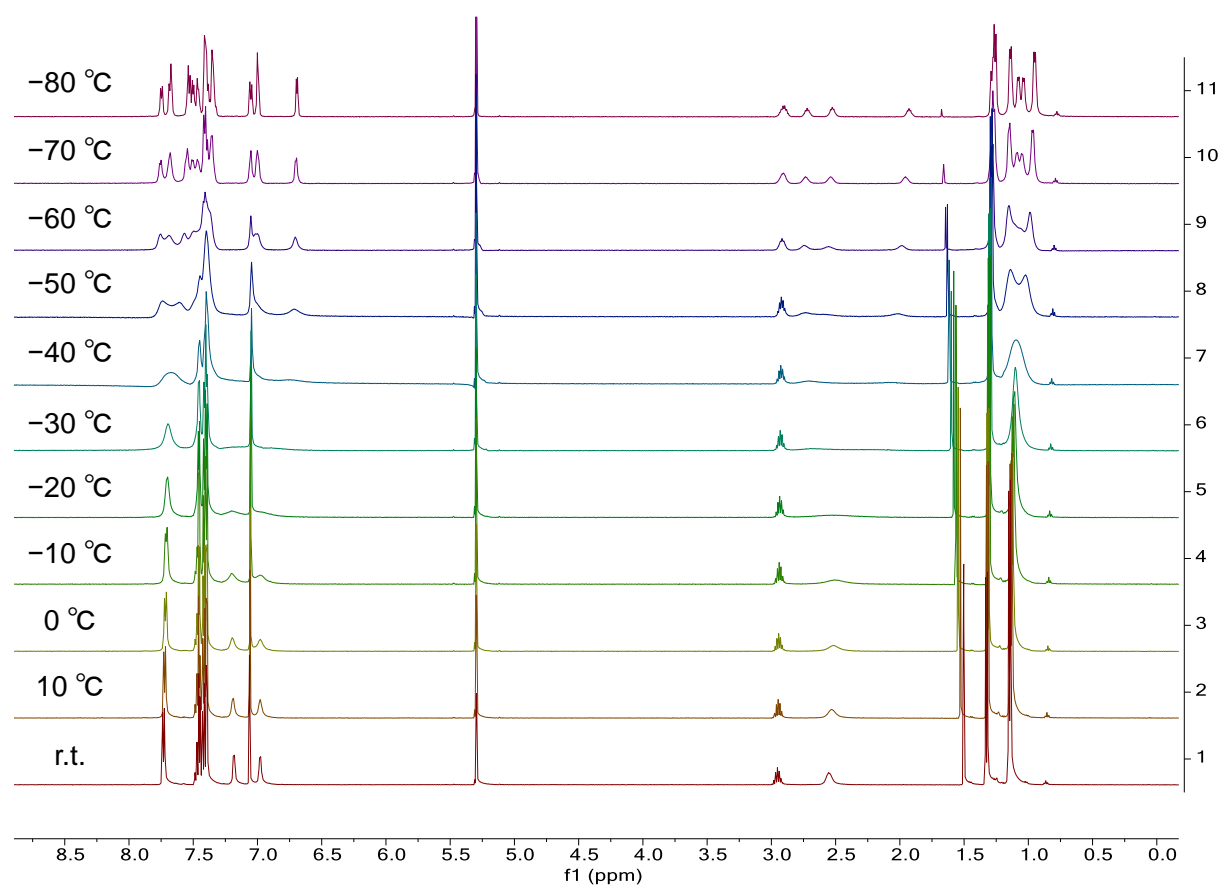**Figure S11** Variable temperature <sup>1</sup>H NMR spectra of **DTCB-SiPh** in CD<sub>2</sub>Cl<sub>2</sub> from room temperature to -80 °C.

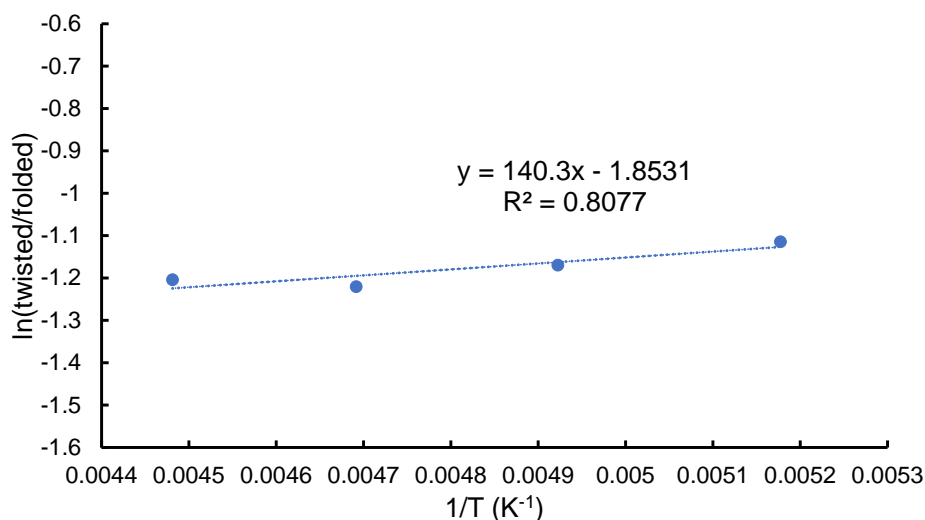

**Figure S12** Van't Hoff plot derived from variable temperature <sup>1</sup>H NMR spectra of **DTCB-SiPh** of the equilibrium between the *anti*-folded and twisted conformers.

**Table S12** Geometrical parameters of **DTCB-SiMe**, **DTCB-SiPh** and **DTCB-SiNp** in the crystal structures.

| Compounds        | Conformer           | Bond length / Å |                  |          | Dihedral angle <sup>[a]</sup> / ° |      | Torsions / °                      |                      |
|------------------|---------------------|-----------------|------------------|----------|-----------------------------------|------|-----------------------------------|----------------------|
|                  |                     | C1-B/<br>C2-B   | C9-Si/<br>C10-Si | C4-C7    | A-B                               | C-D  | τ(C3-C4-C7-C6)/<br>τ(C5-C4-C7-C8) | ω <sup>[b]</sup> / ° |
| <b>DTCB-SiMe</b> | <i>anti</i> -folded | 1.531(2)/       | 1.870(1)/        | 1.361(2) | 34.3                              | 55.7 | -5.9/-0.5                         | 3.2                  |
|                  |                     | 1.532(2)        | 1.869(1)         |          |                                   |      |                                   |                      |
| <b>DTCB-SiPh</b> | <i>anti</i> -folded | 1.532(2)/       | 1.859(2)/        | 1.362(2) | 33.6                              | 58.3 | -3.6/-2.9                         | 3.3                  |
|                  |                     | 1.531(3)        | 1.868(2)         |          |                                   |      |                                   |                      |
| <b>DTCB-SiNp</b> | <i>anti</i> -folded | 1.540(2)/       | 1.861(1)/        | 1.361(2) | 33.9                              | 56.5 | -9.3/-2.9                         | 6.1                  |
|                  |                     | 1.537(2)        | 1.871(1)         |          |                                   |      |                                   |                      |

<sup>[a]</sup> Dihedral angle between the two mean planes of the tricyclic structures (A–B and C–D), which is defined as the dihedral angle between the least-square planes of the atoms in the thiophene rings of each tricyclic structure. <sup>[b]</sup> Torsion angle (ω) around C4=C7 is defined as the absolute value of average of the dihedral angles τ(C3–C4–C7–C6) and τ(C5–C4–C7–C8).

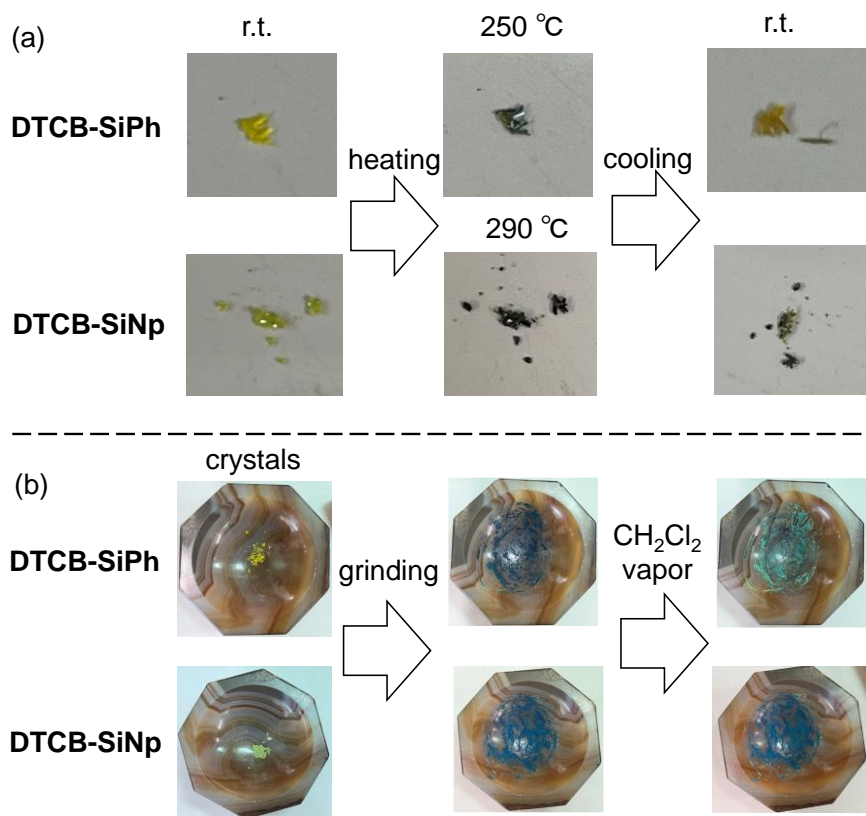

**Figure S13** Thermochromism and mechanochromism of crystals of **DTCB-SiPh** and **DTCB-SiNp** in variable temperature.

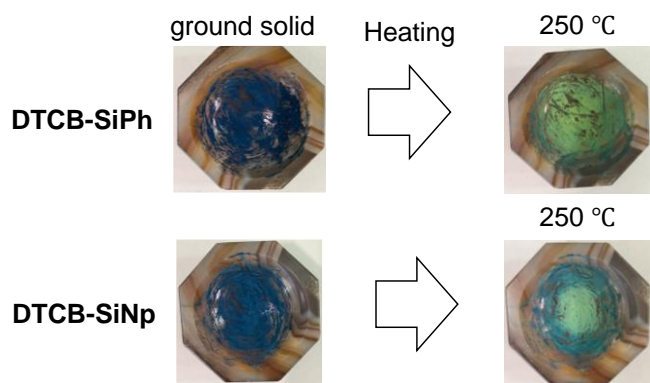

**Figure S14** Thermal annealing of the ground solid of **DTCB-SiPh** and **DTCB-SiNp**.

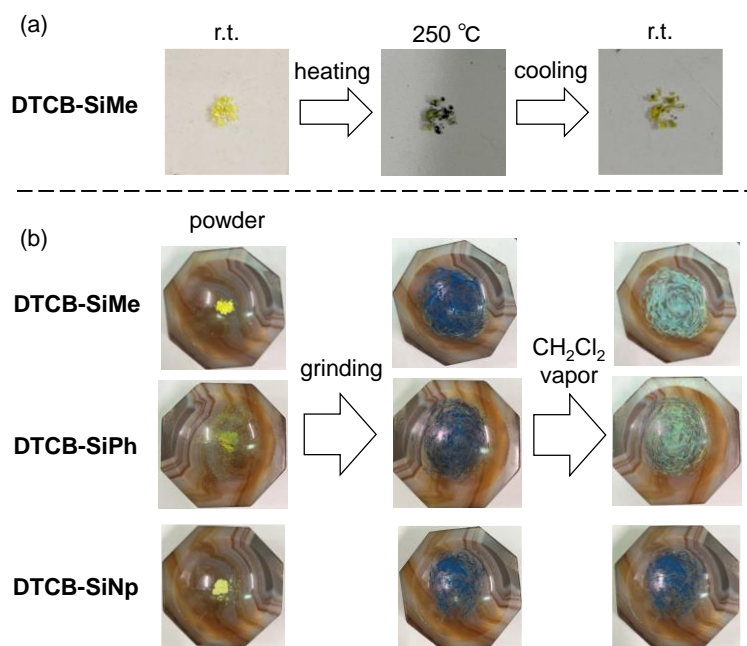

**Figure S15** (a) Thermochromism and (b) mehanochromism of precipitated solid.

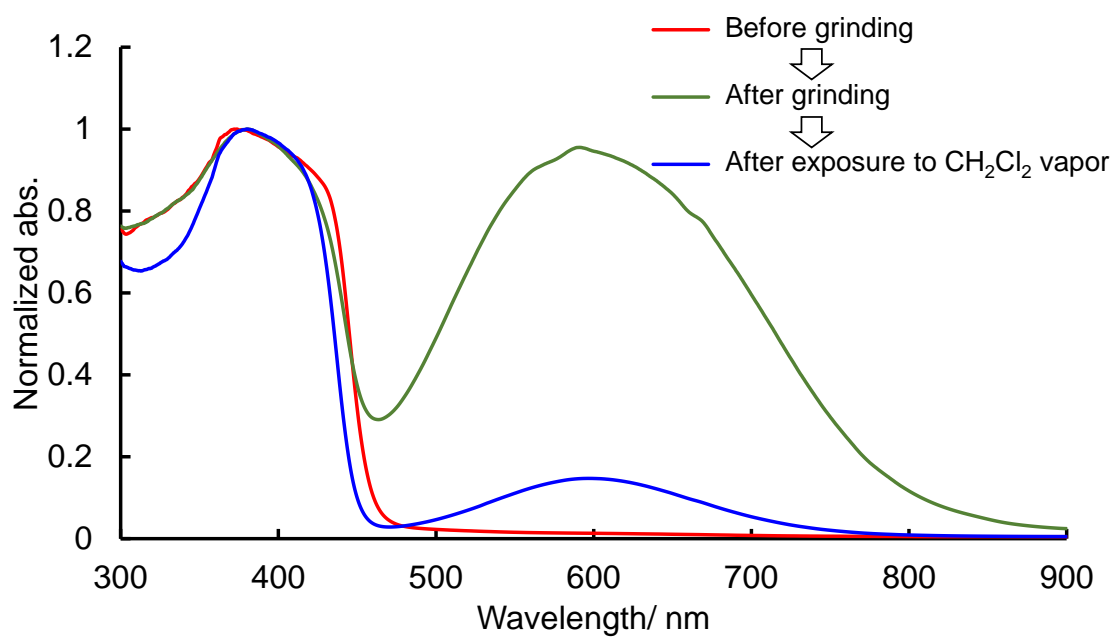

**Figure S16** Normalized absorption spectra of **DTCB-SiMe** as solids converted from the diffuse reflectance spectra.

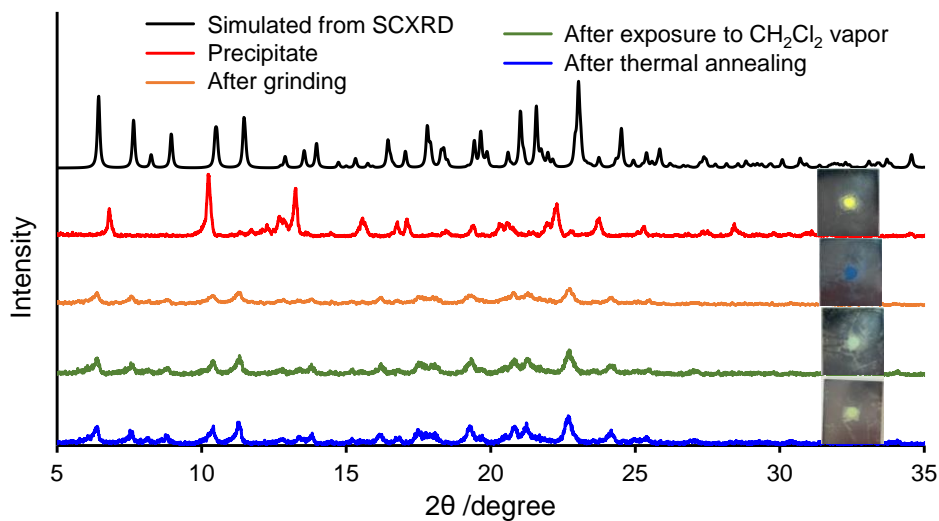

**Figure S17** XRD patterns of a powder sample recorded at room temperature.

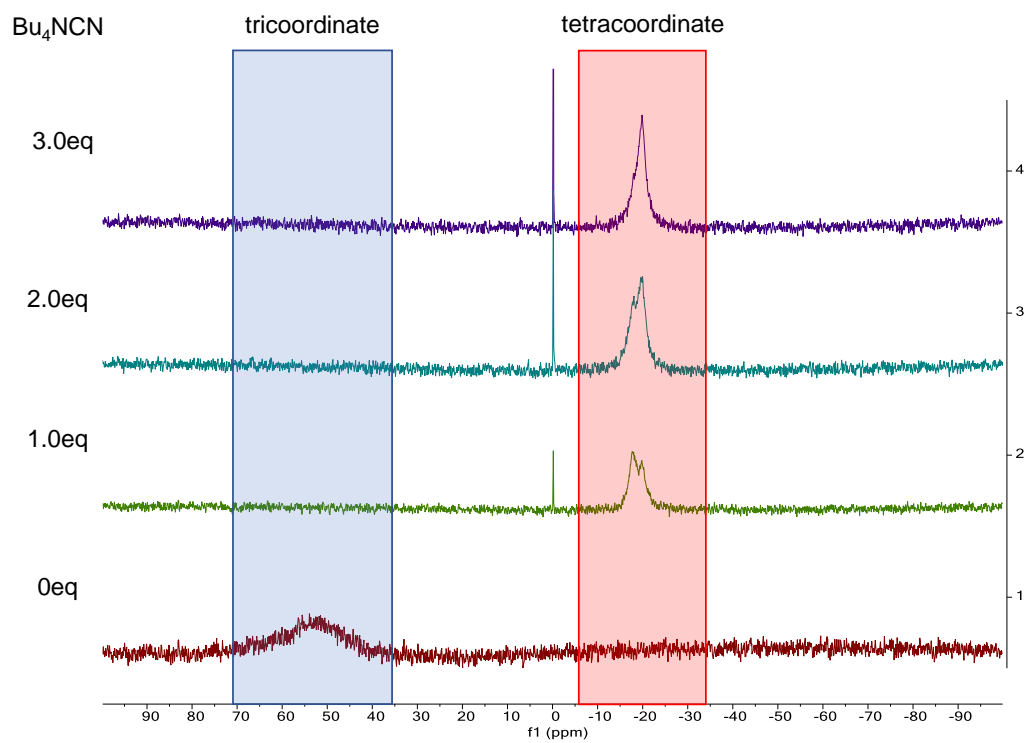

**Figure S18**  $^{11}\text{B}$  NMR spectra of DTCB-SiPh in  $\text{C}_6\text{D}_6$  before and after addition of  $\text{Bu}_4\text{NCN}$ .

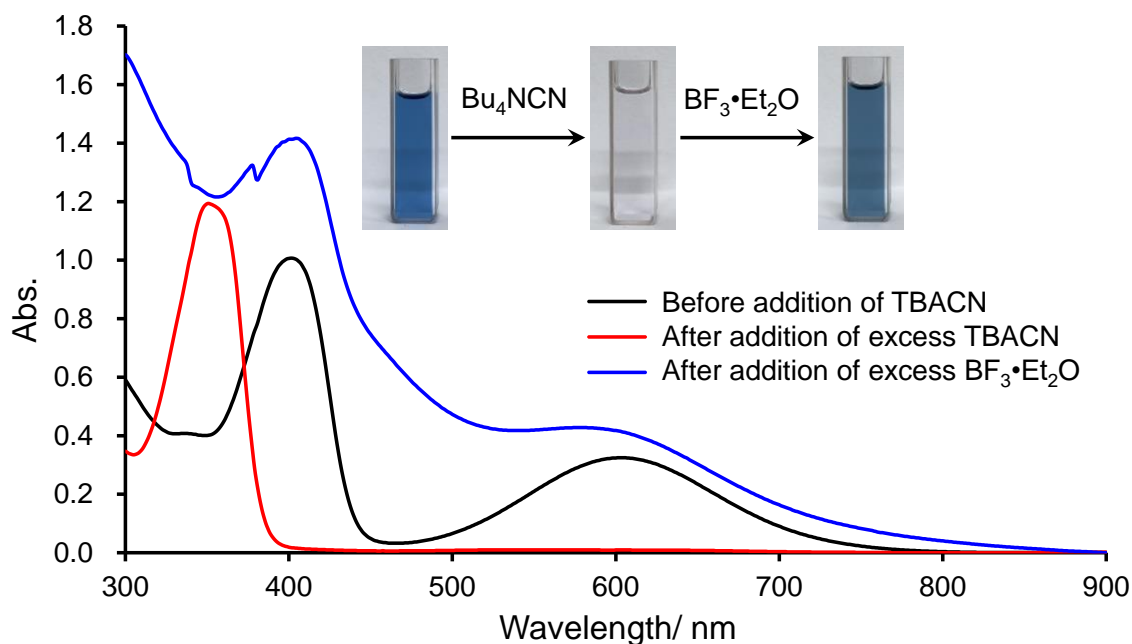

**Figure S19** Reversibility of anion responsiveness of **DTCB-SiPh** at the concentration of 45  $\mu\text{mol/L}$ .

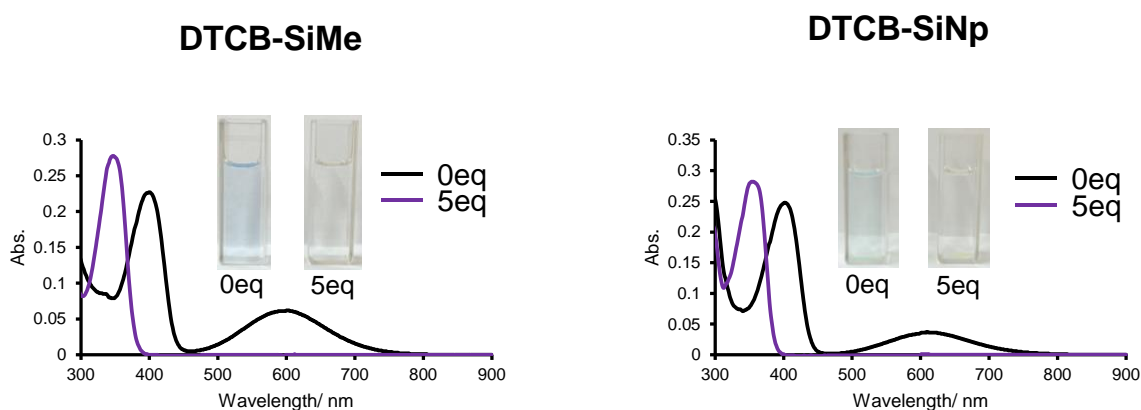

**Figure S20** Absorption data for titrations of **DTCB-SiMe** and **DTCB-SiNp** with TBACN aliquots in toluene at the concentration of 10  $\mu\text{mol/L}$  and 9.9  $\mu\text{mol/L}$ , respectively.

**Table S13** DFT-calculated Gibbs free energies of **DTCB-SiPh** before and after the coordination of cyanide ion on the boron center at the B3LYP/6-31G(d) level at 298 K.

|                 | Conformer           | $G^{\text{DFT}}/\text{kJ mol}^{-1}$ | $\Delta G^{\text{DFT}[\text{a}]}/\text{kJ mol}^{-1}$ |
|-----------------|---------------------|-------------------------------------|------------------------------------------------------|
| Cyanide-free    | <i>anti</i> -folded | -9572388.78                         | -1.8                                                 |
|                 | twisted             | -9572390.53                         |                                                      |
| Cyanide complex | <i>anti</i> -folded | -9816307.51                         | +3.5                                                 |
|                 | twisted             | -9816303.96                         |                                                      |

<sup>[a]</sup>  $\Delta G = G(\text{twisted}) - G(\text{anti-folded})$ .



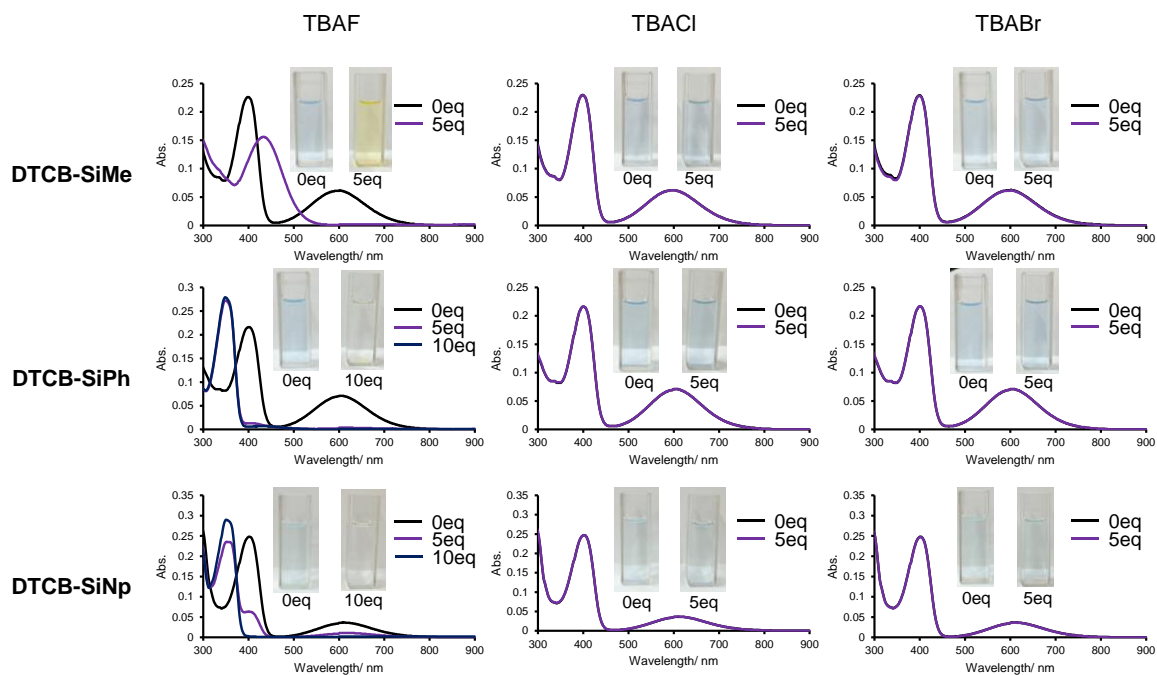

**Figure S21** Absorption data for titrations of **DTCB-SiMe**, **DTCB-SiPh**, and **DTCB-SiNp** with tetrabutylammonium fluoride (TBAF), chloride (TBACl), and bromide (TBABr) aliquots in toluene at the concentration of 10  $\mu\text{mol/L}$ , 10  $\mu\text{mol/L}$ , and 9.9  $\mu\text{mol/L}$ , respectively.

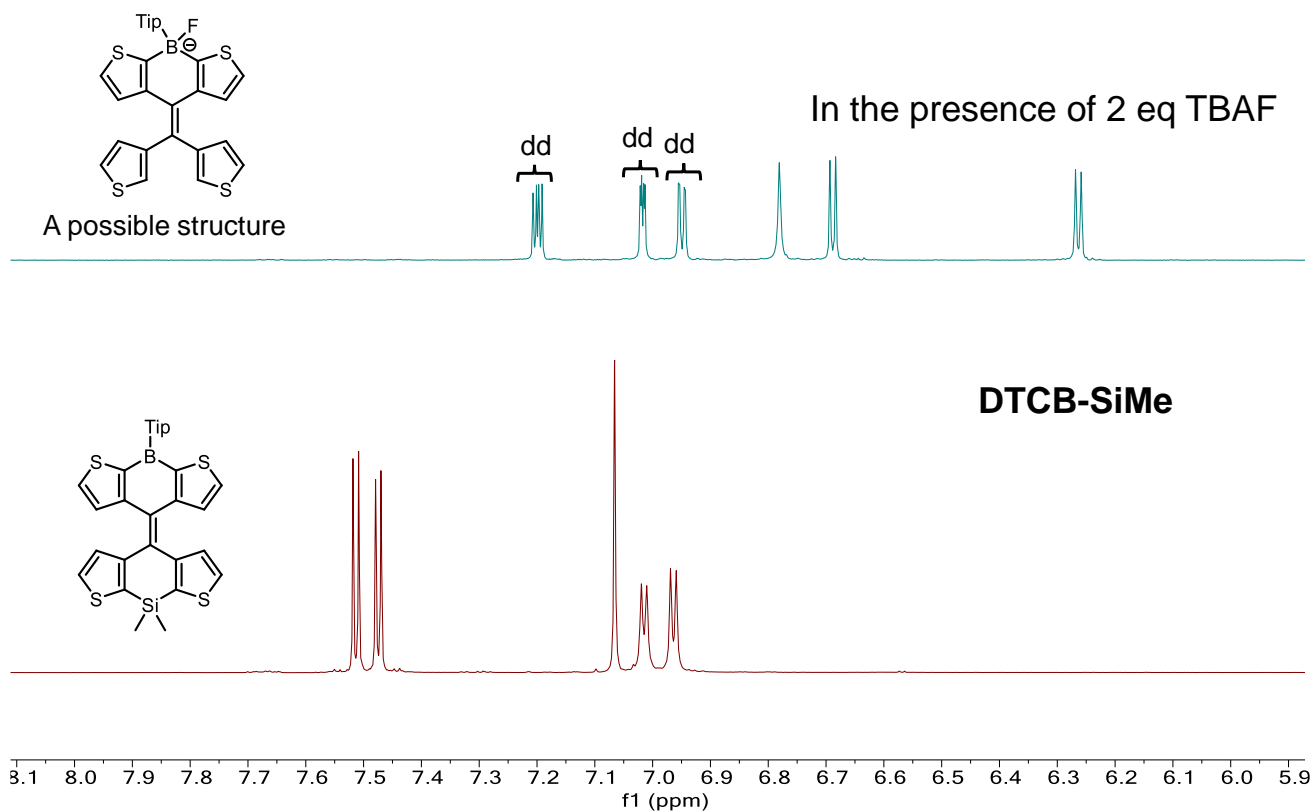

**Figure S22**  $^1\text{H}$  NMR spectra of **DTCB-SiMe** before and after addition of TBAF in  $\text{THF-}d_8$  at room temperature.

***NMR and IR spectra***

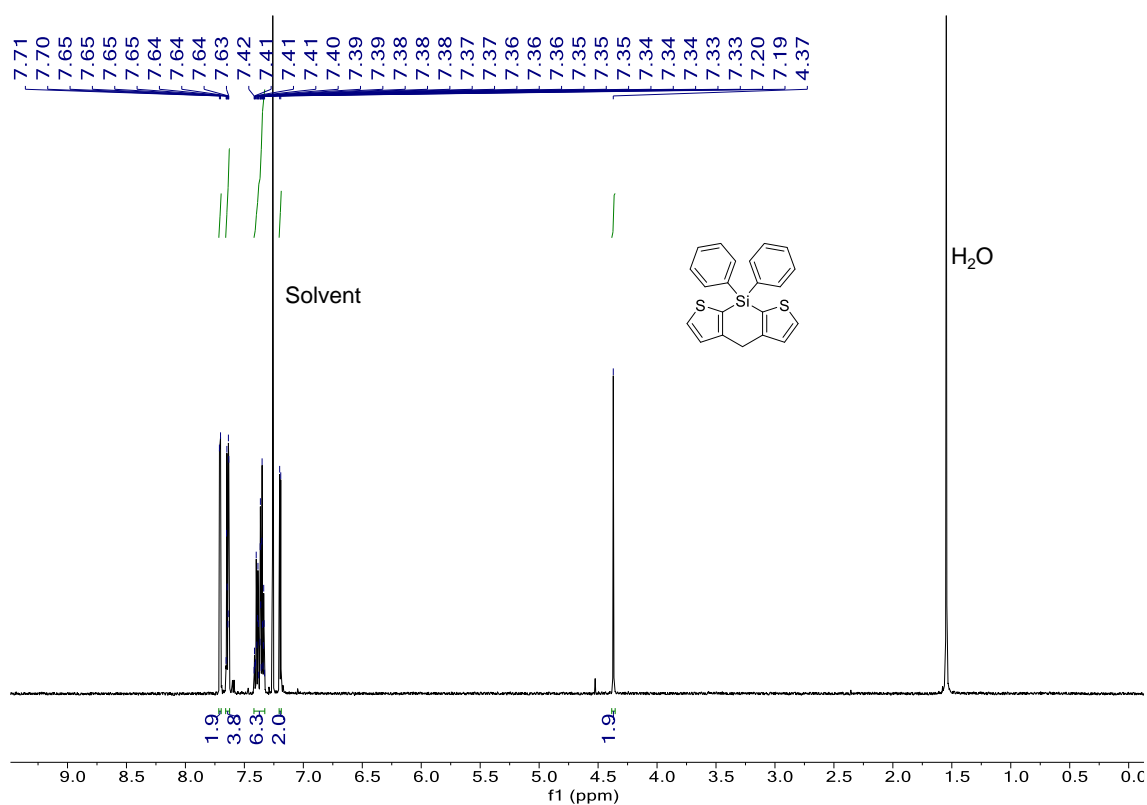

**Figure S23** <sup>1</sup>H NMR spectrum of **1-Ph** in CDCl<sub>3</sub> at room temperature (500 MHz).

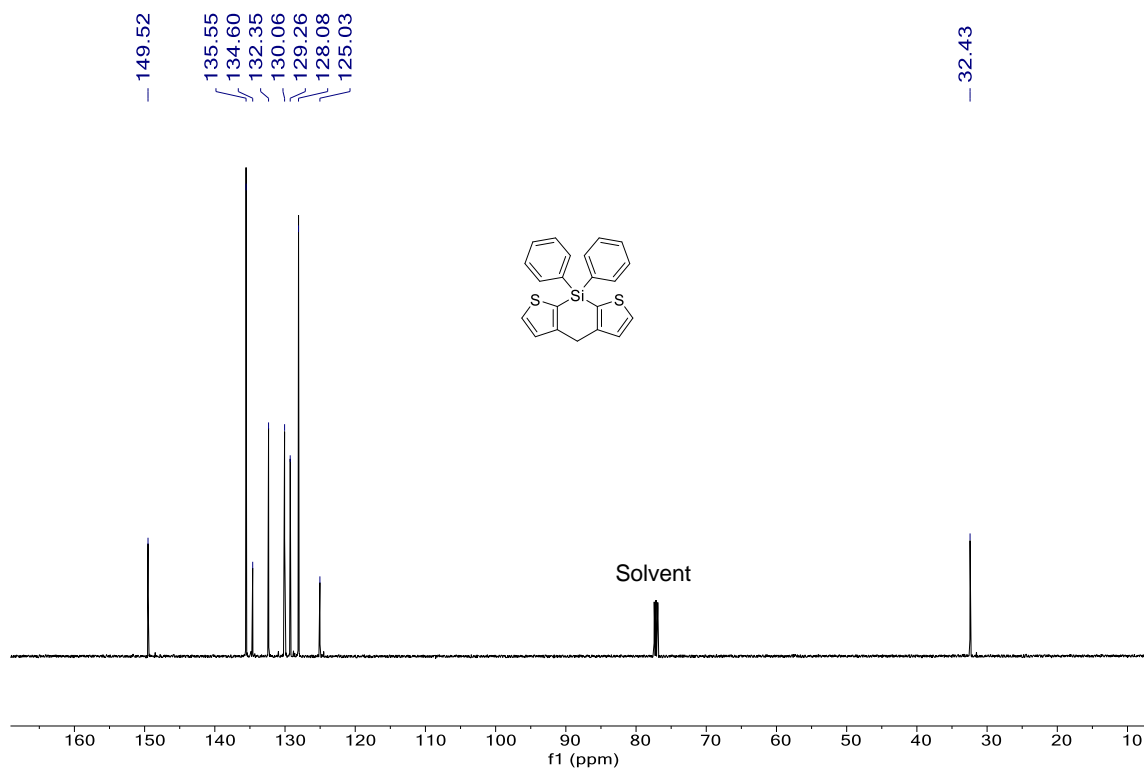

**Figure S24** <sup>13</sup>C NMR spectrum of **1-Ph** in CDCl<sub>3</sub> at room temperature (125 MHz).

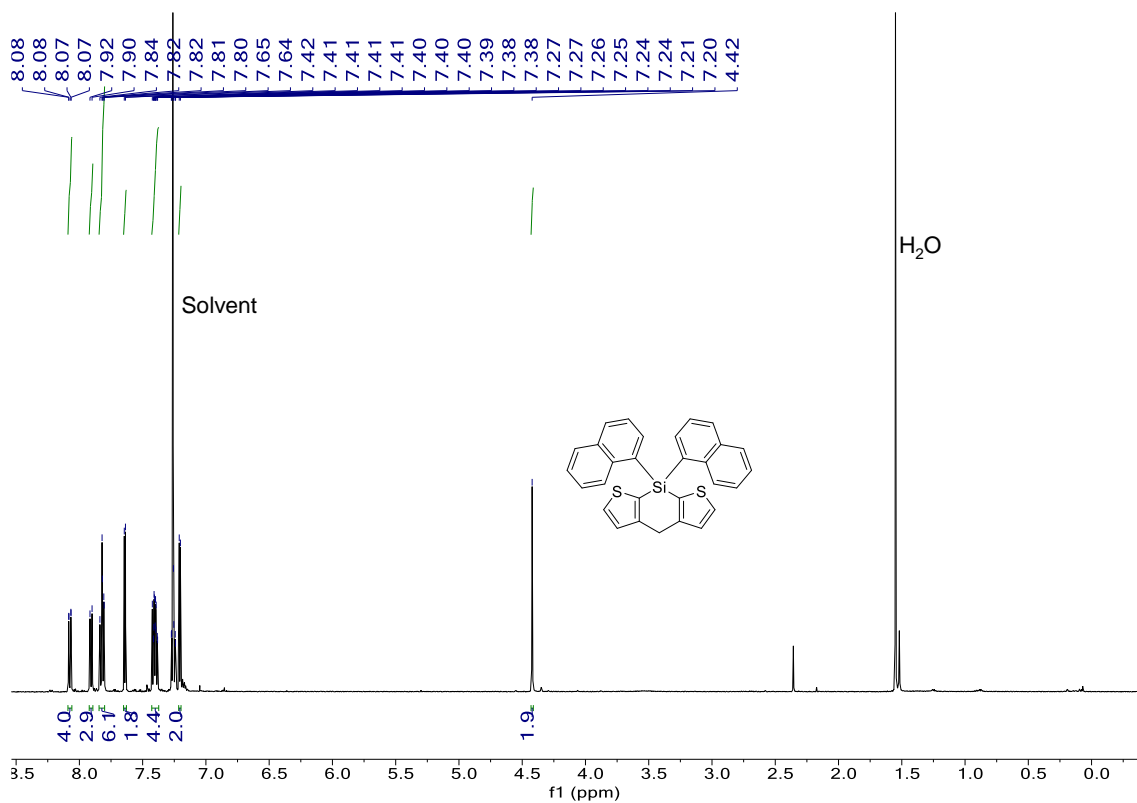

Figure S25  $^1\text{H}$  NMR spectrum of **1-Np** in  $\text{CDCl}_3$  at room temperature (500 MHz).

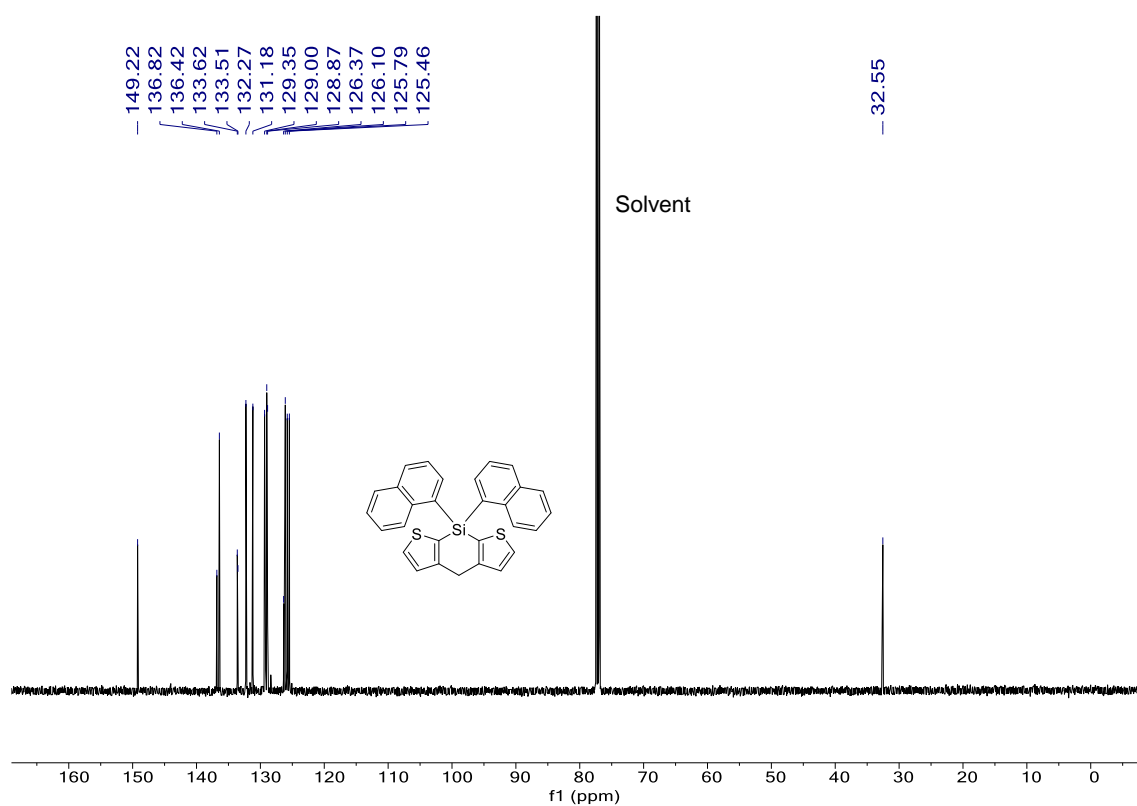

Figure S26  $^{13}\text{C}$  NMR spectrum of **1-Np** in  $\text{CDCl}_3$  at room temperature (125 MHz).

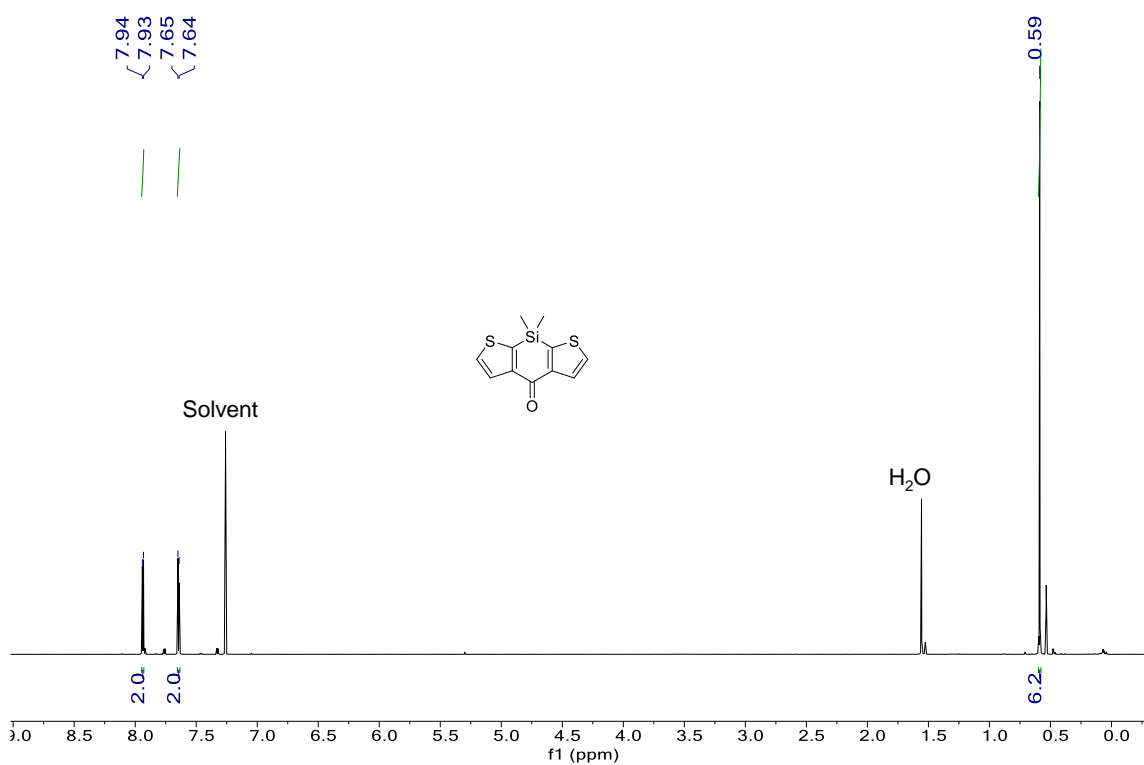

**Figure S27**  $^1\text{H}$  NMR spectrum of **2-Me** in  $\text{CDCl}_3$  at room temperature (500 MHz).

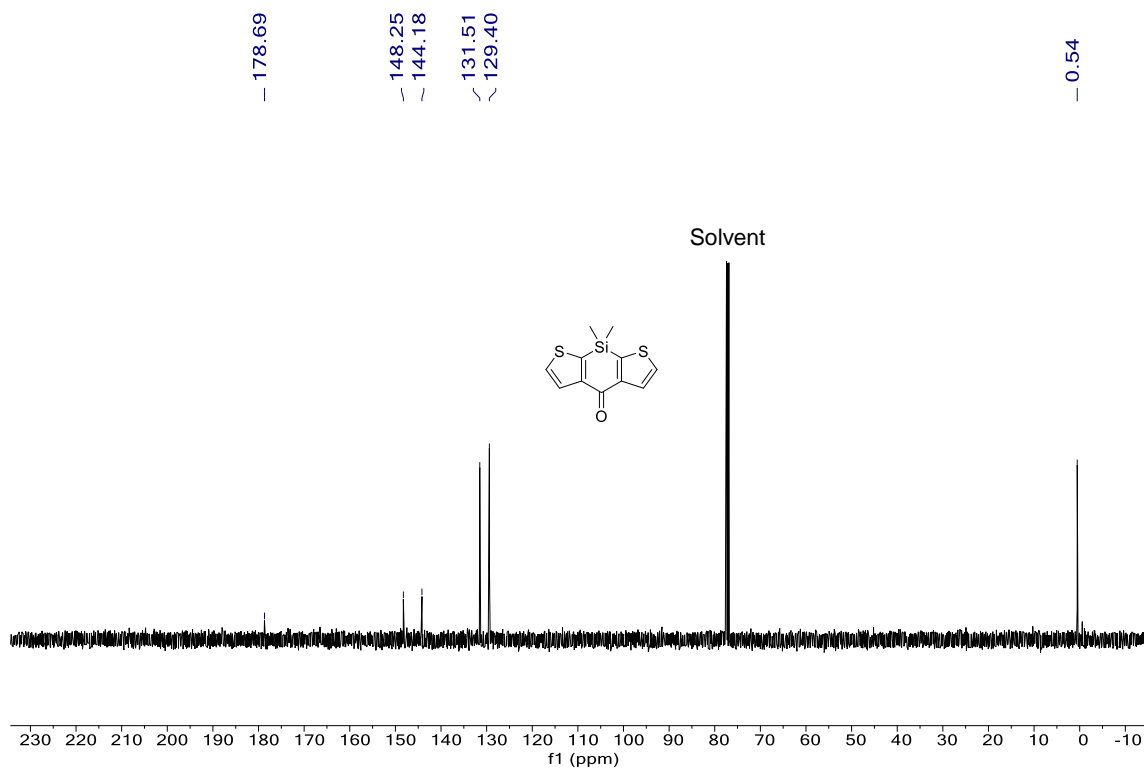

**Figure S28**  $^{13}\text{C}$  NMR spectrum of **2-Me** in  $\text{CDCl}_3$  at room temperature (125 MHz).

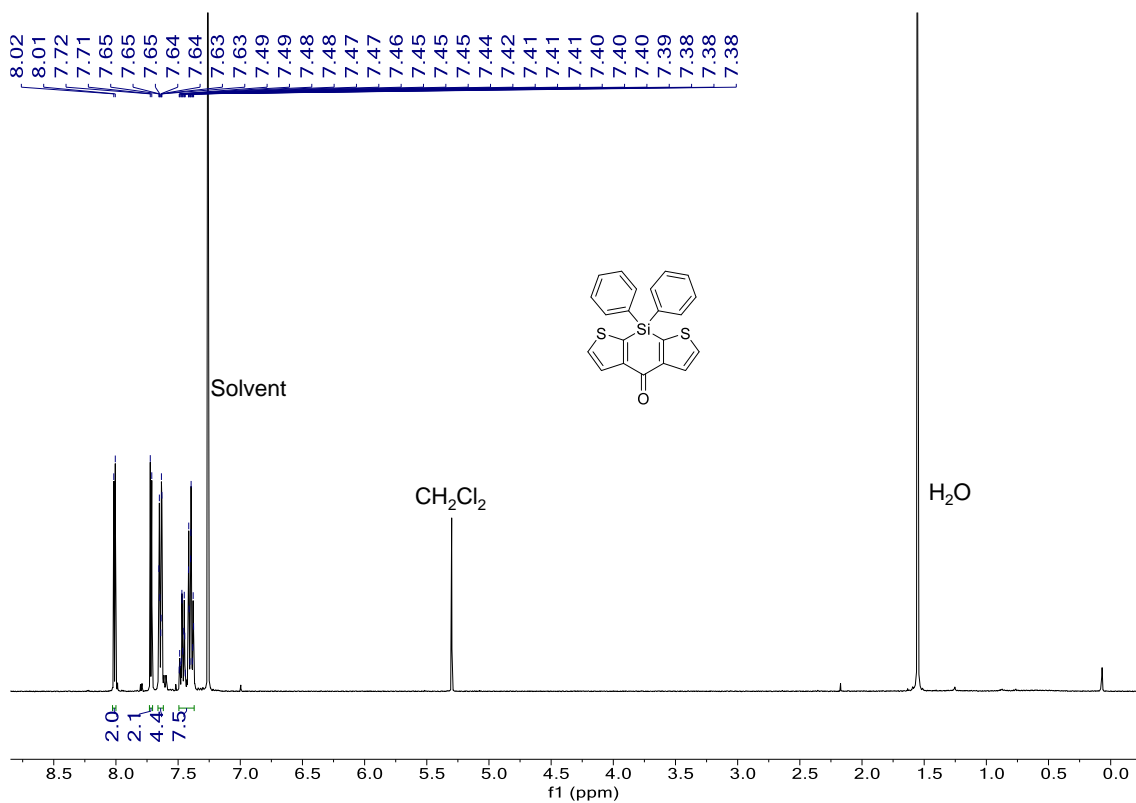

Figure S29 <sup>1</sup>H NMR spectrum of 2-Ph in CDCl<sub>3</sub> at room temperature (400 MHz).

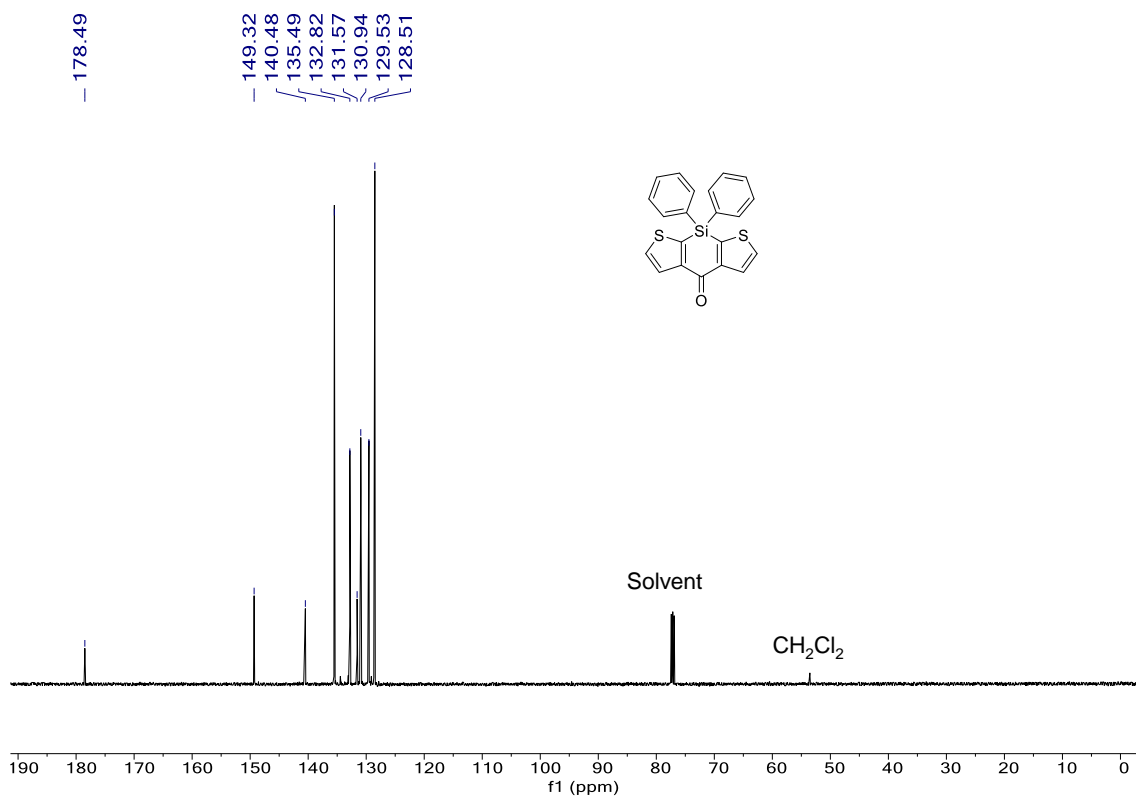

Figure S30 <sup>13</sup>C NMR spectrum of 2-Ph in CDCl<sub>3</sub> at room temperature (125 MHz).

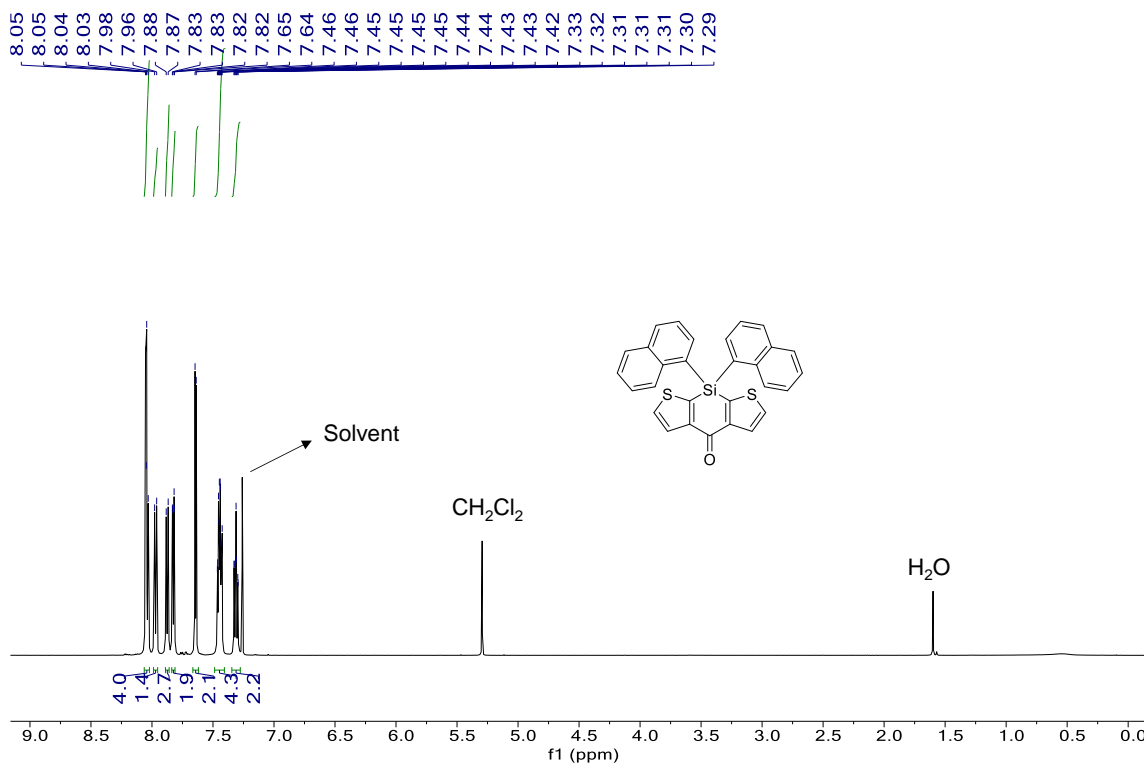

Figure S31 <sup>1</sup>H NMR spectrum of 2-Np in CDCl<sub>3</sub> at room temperature (500 MHz).

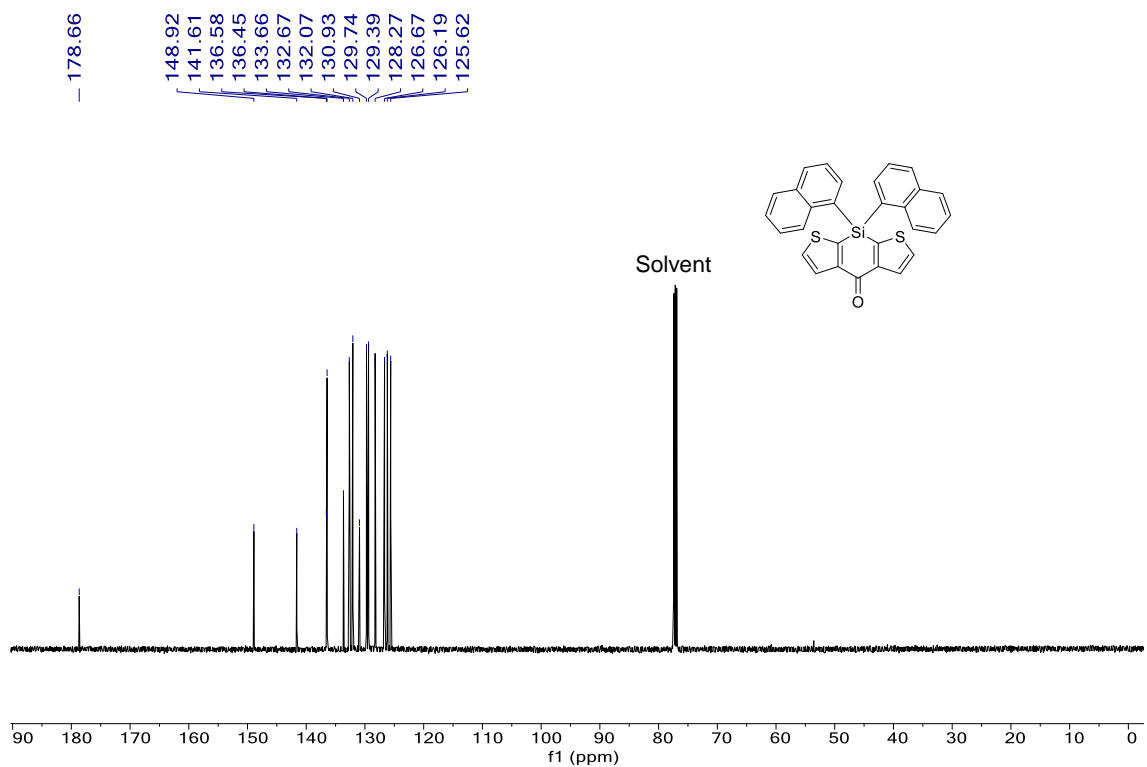

Figure S32 <sup>13</sup>C NMR spectrum of 2-Np in CDCl<sub>3</sub> at room temperature (125 MHz).

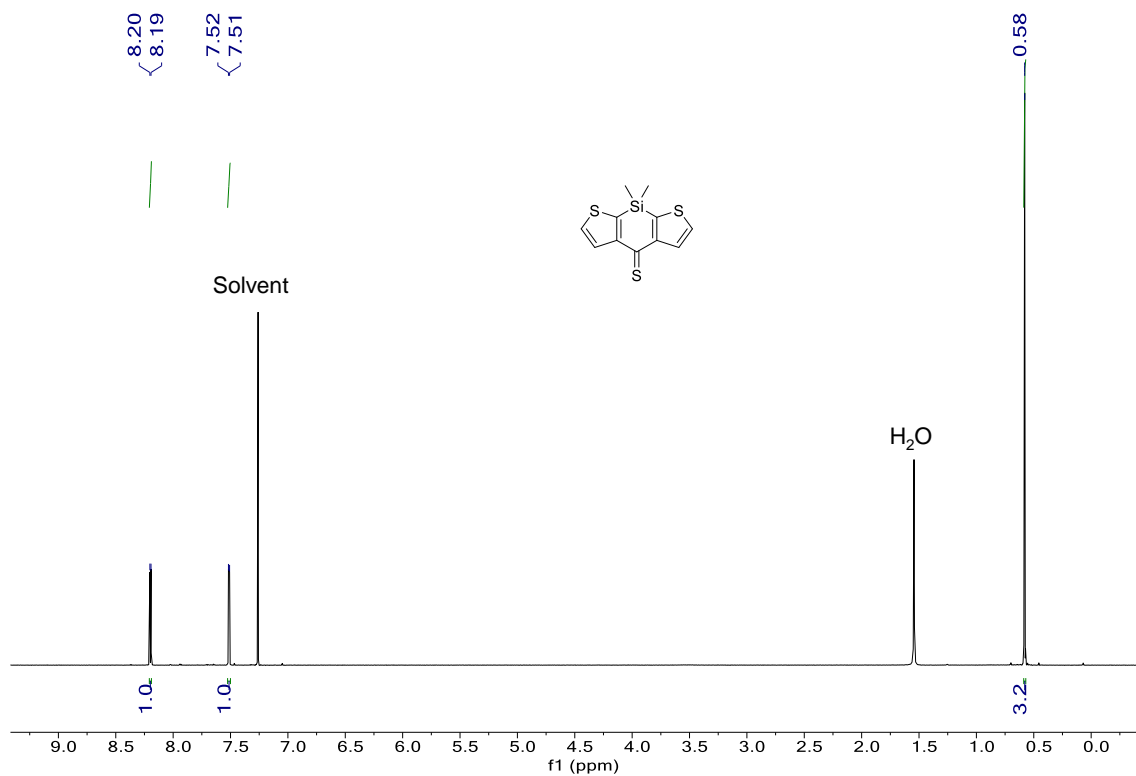

**Figure S33** <sup>1</sup>H NMR spectrum of **3-Ph** in CDCl<sub>3</sub> at room temperature (500 MHz).

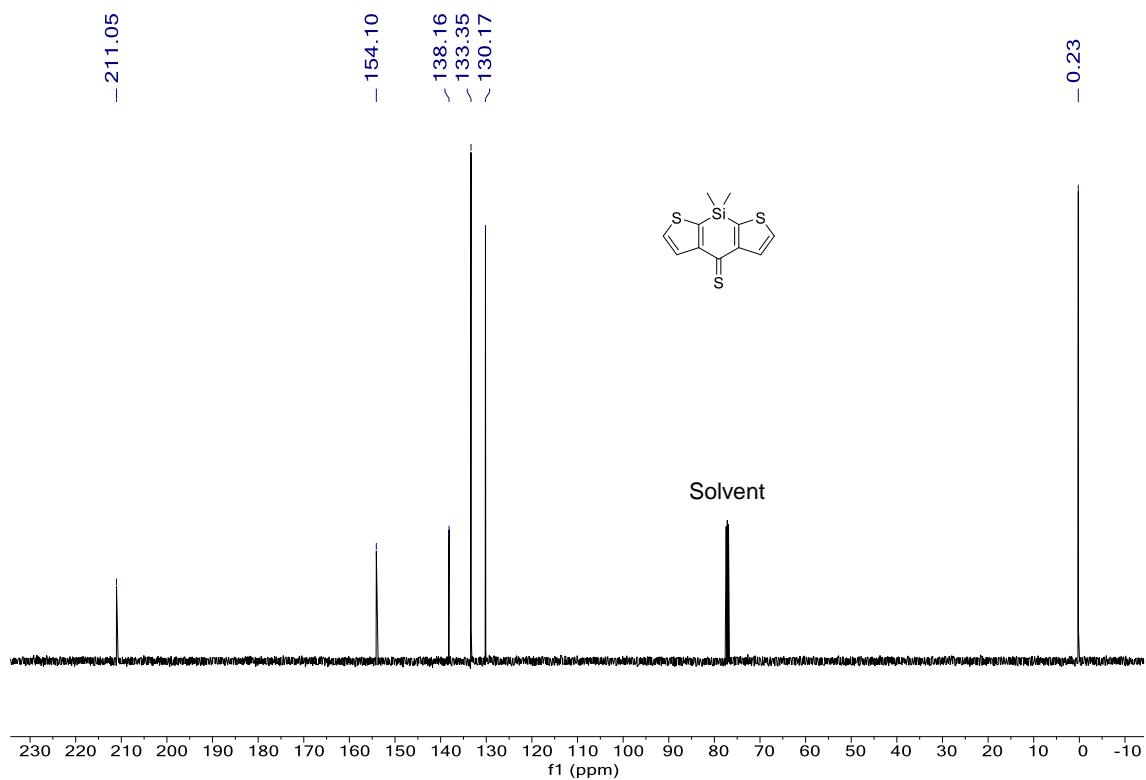

**Figure S34** <sup>13</sup>C NMR spectrum of **3-Me** in CDCl<sub>3</sub> at room temperature (125 MHz).

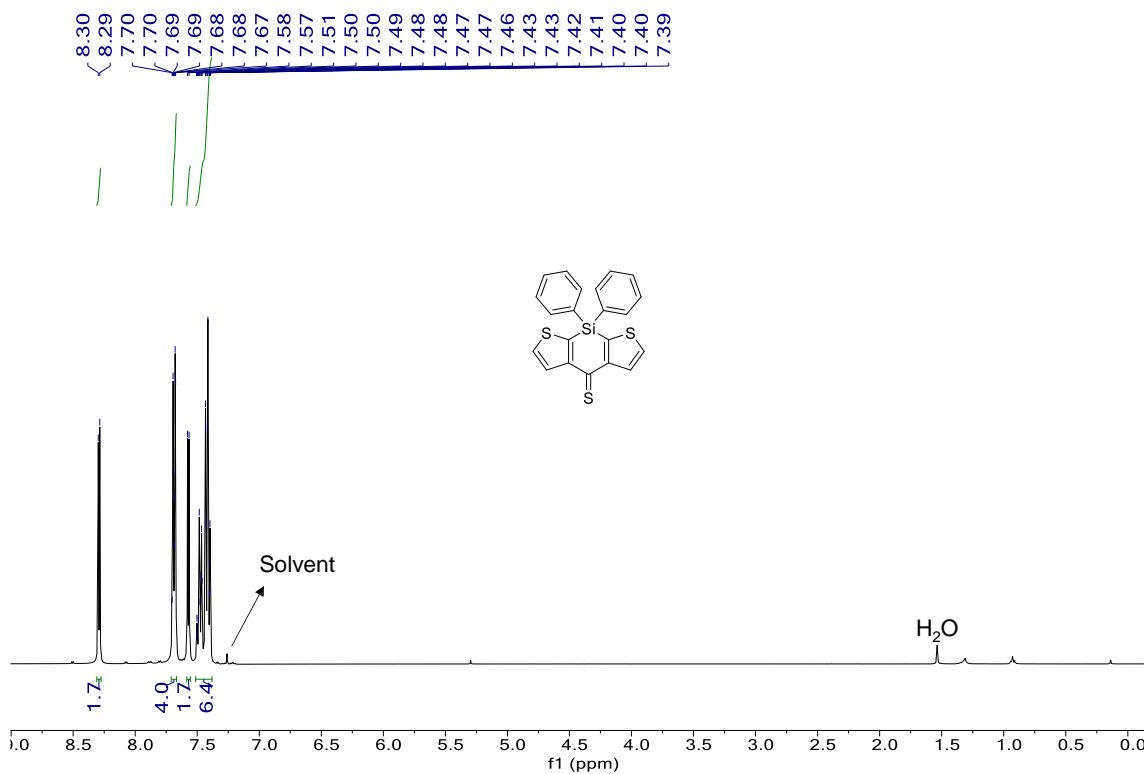

**Figure S35** <sup>1</sup>H NMR spectrum of **3-Ph** in CDCl<sub>3</sub> at room temperature (400 MHz).

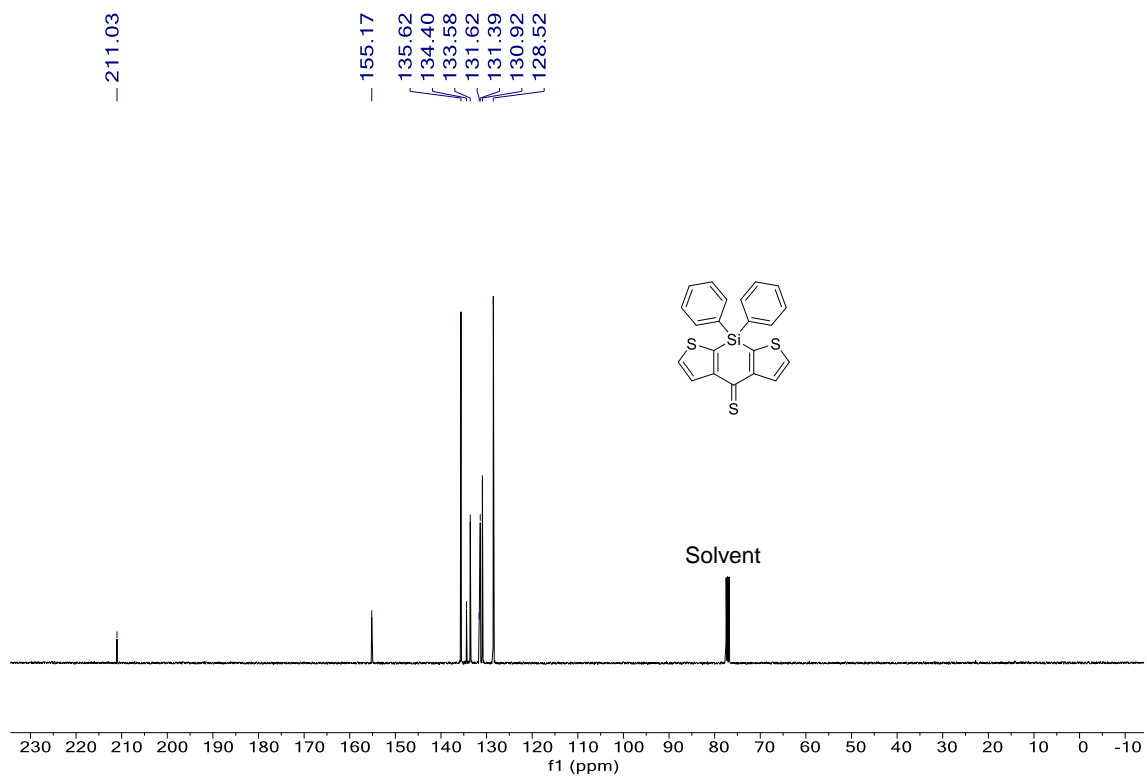

**Figure S36** <sup>13</sup>C NMR spectrum of **3-Ph** in CDCl<sub>3</sub> at room temperature (100 MHz).



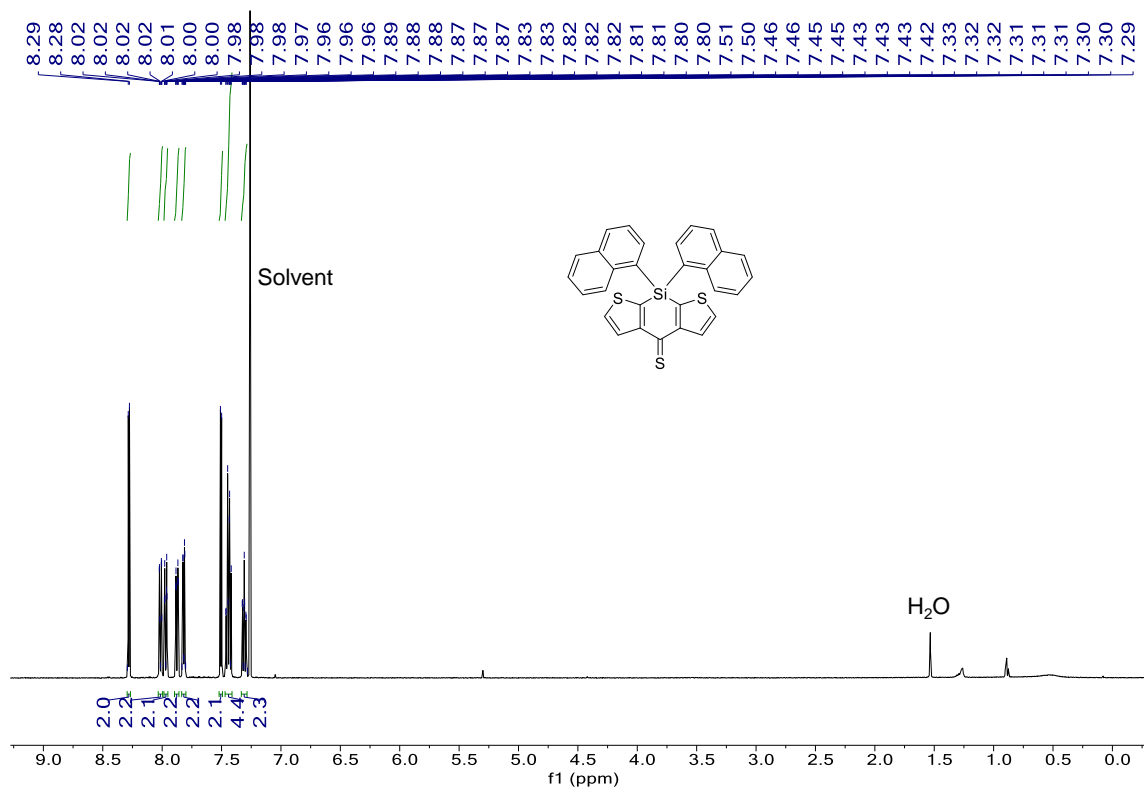

**Figure S37** <sup>1</sup>H NMR spectrum of **3-Np** in CDCl<sub>3</sub> at room temperature (500 MHz).

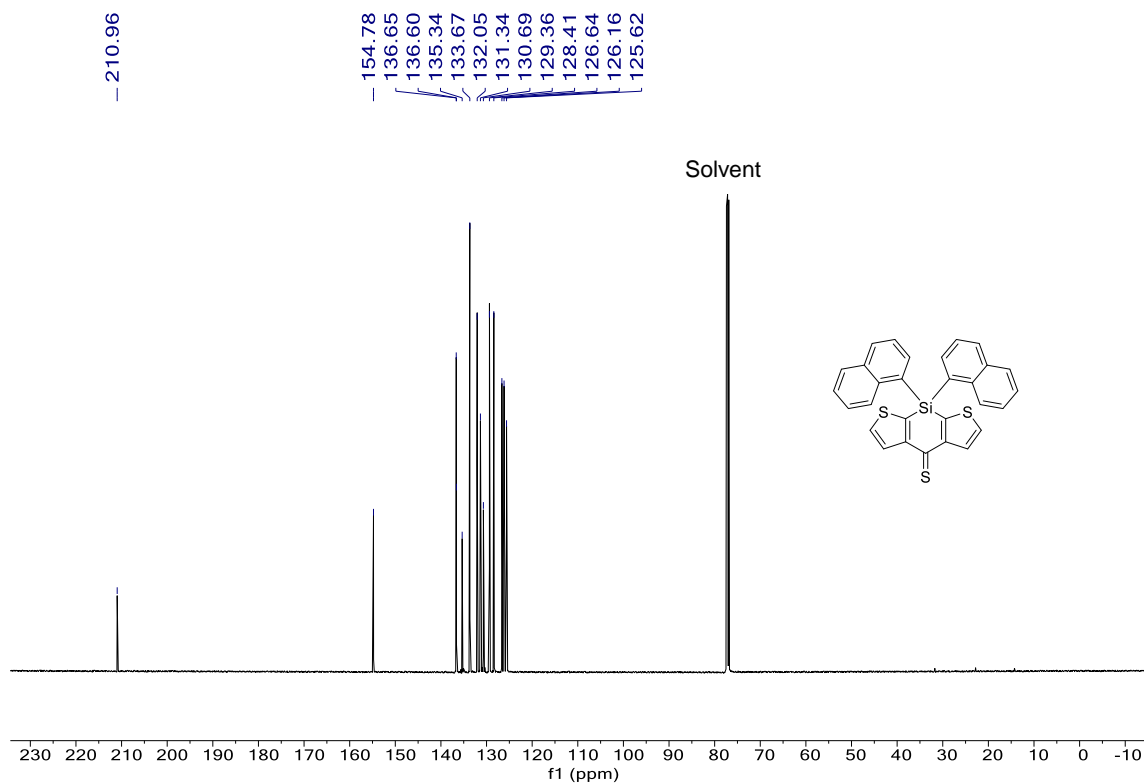

**Figure S38** <sup>13</sup>C NMR spectrum of **3-Np** in CDCl<sub>3</sub> at room temperature (125 MHz).

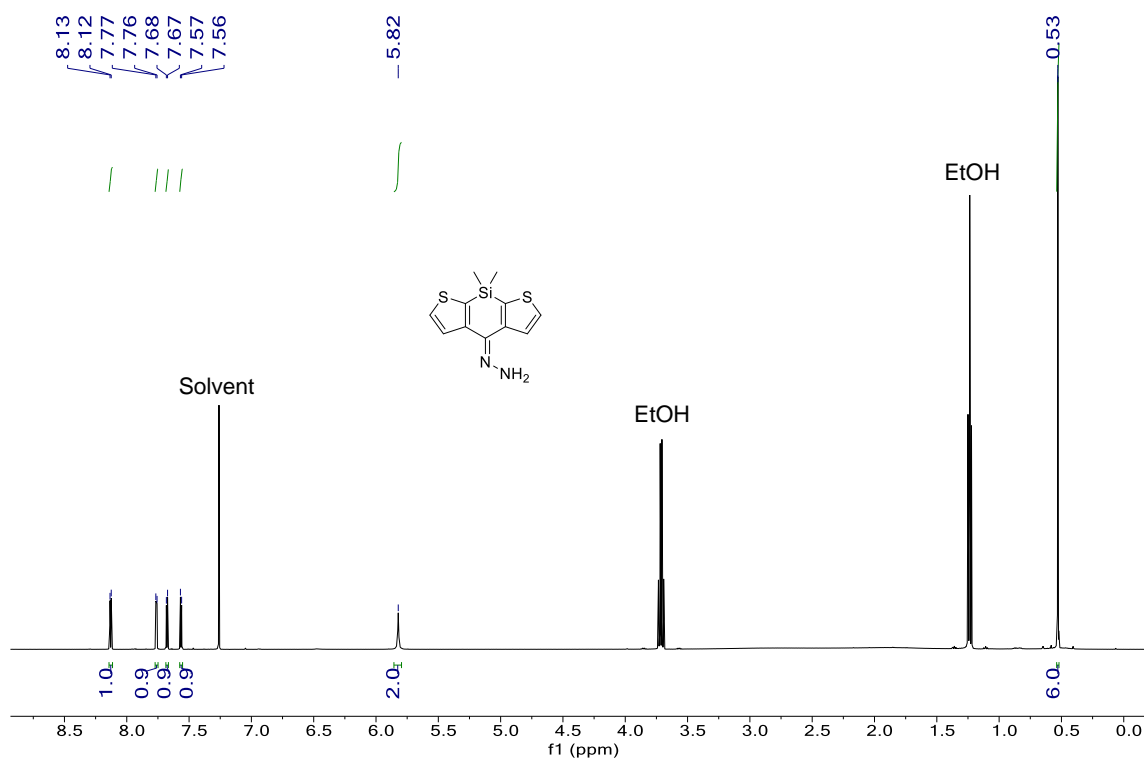

Figure S39  $^1\text{H}$  NMR spectrum of 4-Me in  $\text{CDCl}_3$  at room temperature (500 MHz).

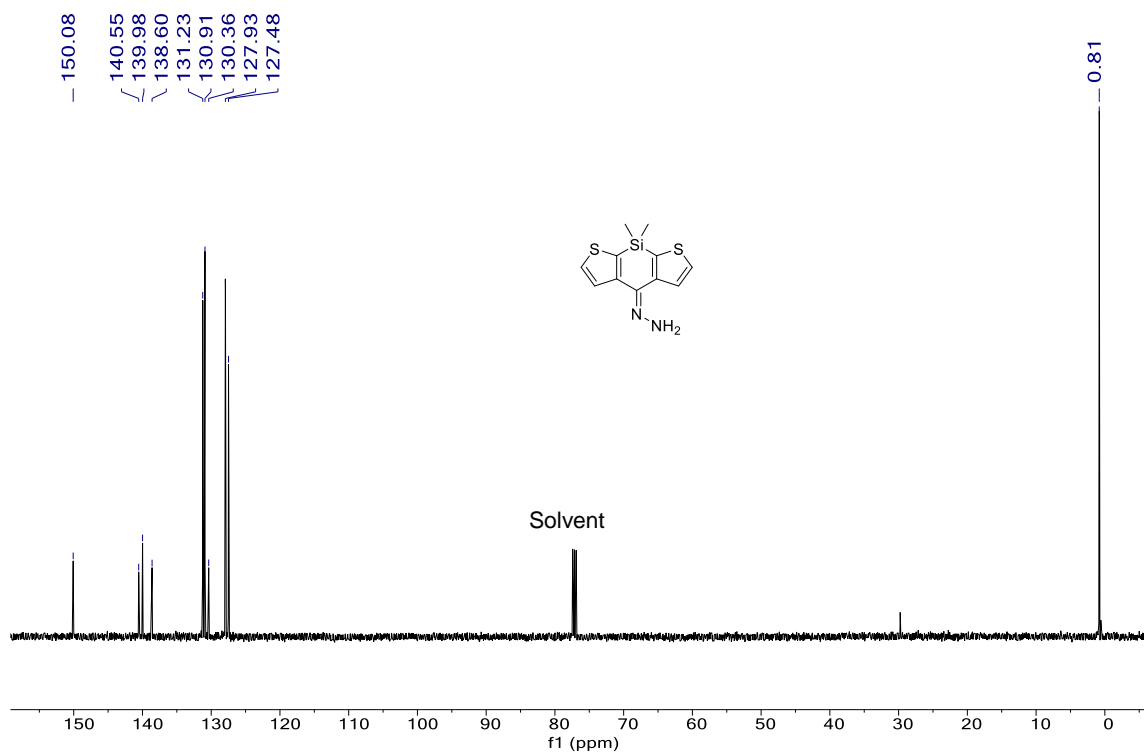

Figure S40  $^{13}\text{C}$  NMR spectrum of 4-Me in  $\text{CDCl}_3$  at room temperature (100 MHz).

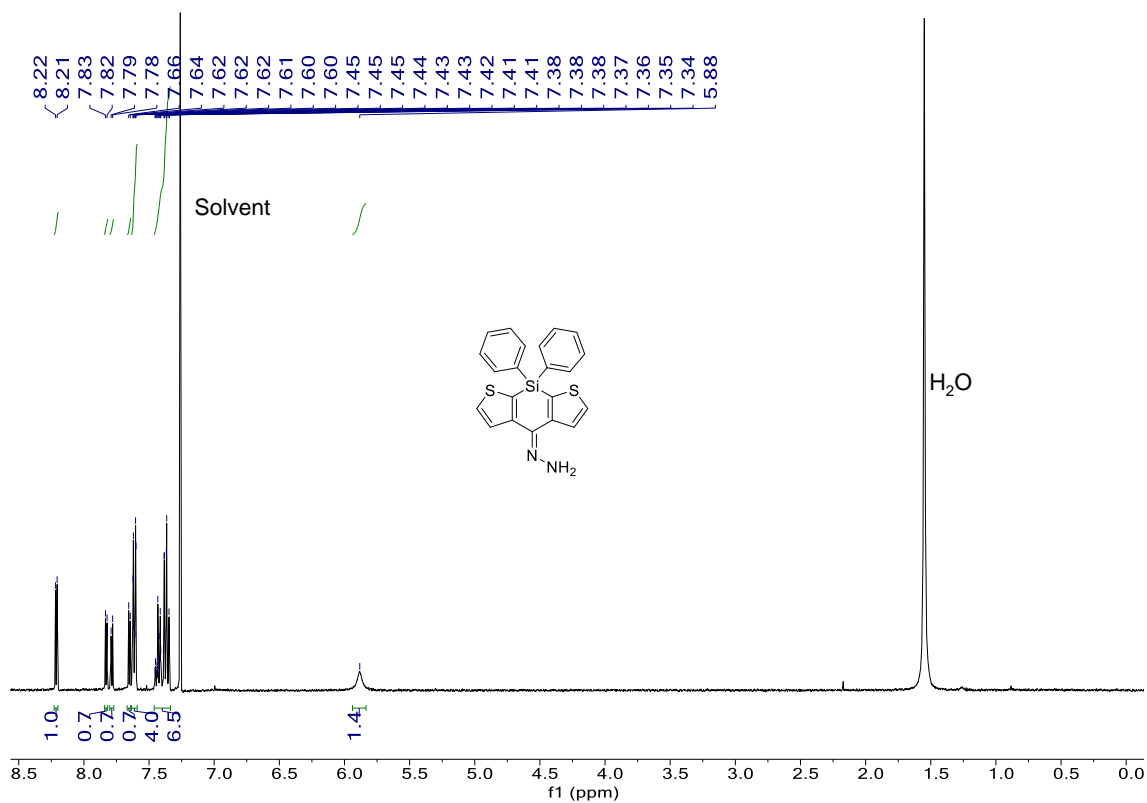

Figure S41 <sup>1</sup>H NMR spectrum of 4-Ph in CDCl<sub>3</sub> at room temperature (400 MHz).

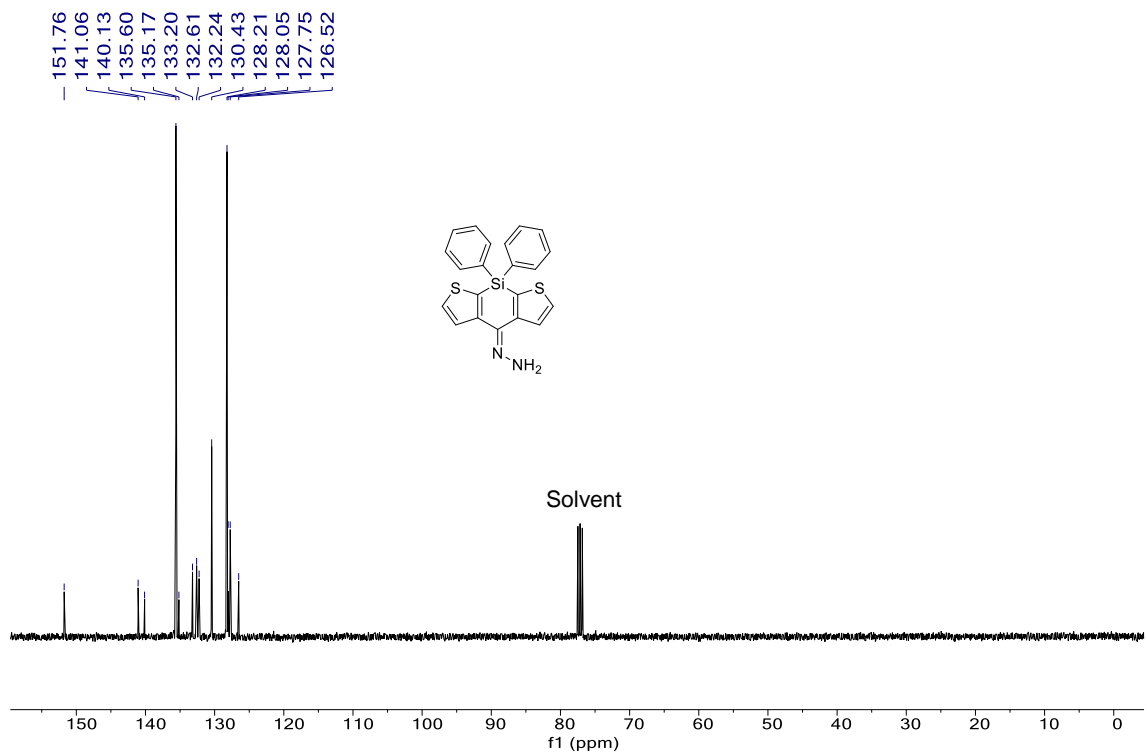

Figure S42 <sup>13</sup>C NMR spectrum of 4-Ph in CDCl<sub>3</sub> at room temperature (100 MHz).

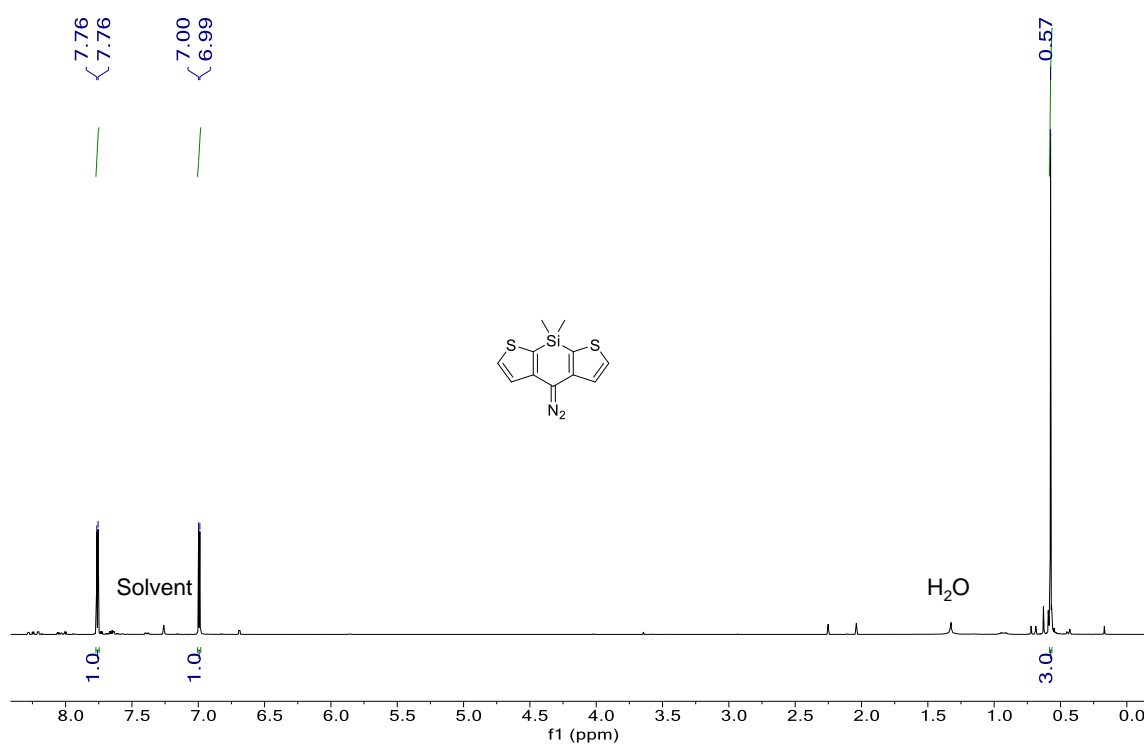

**Figure S43**  $^1\text{H}$  NMR spectrum of **5-Me** in  $\text{CDCl}_3$  at room temperature (500 MHz).

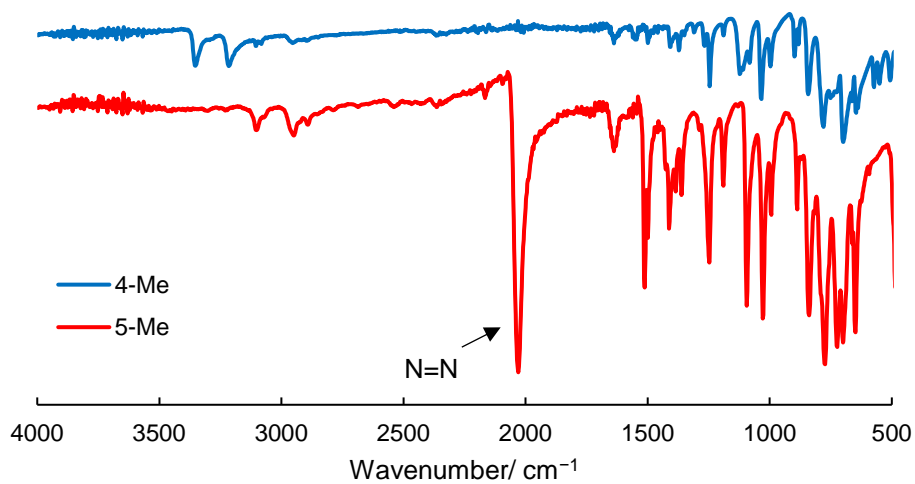

**Figure S44** ATR-FTIR spectra of **4-Me** and **5-Me**.

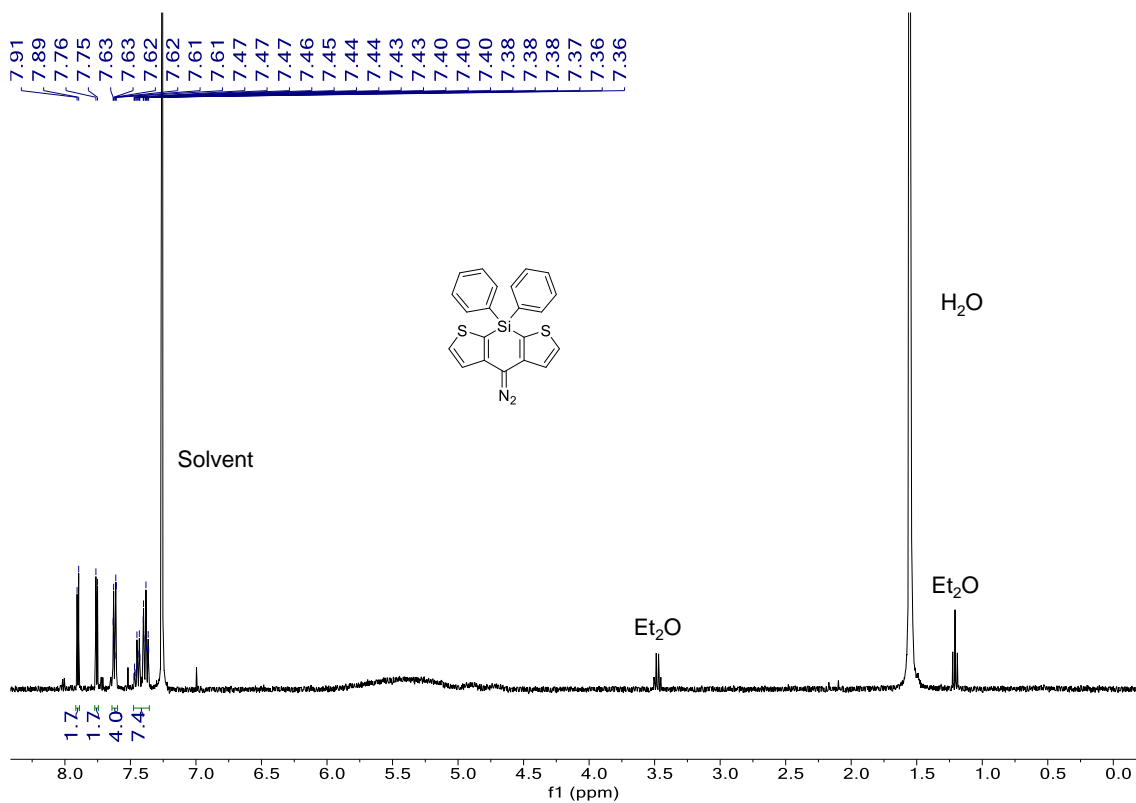

Figure S45 <sup>1</sup>H NMR spectrum of 5-Ph in CDCl<sub>3</sub> at room temperature (400 MHz).

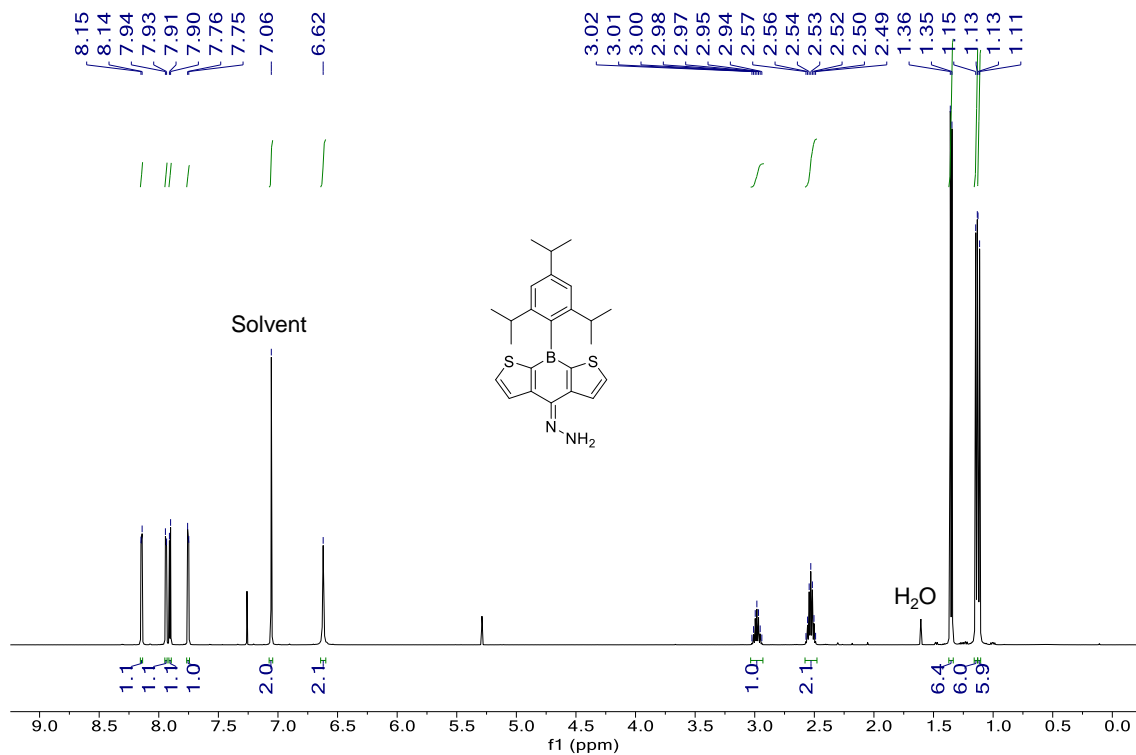

Figure S46 <sup>1</sup>H NMR spectrum of 7 in CDCl<sub>3</sub> at room temperature (500 MHz).

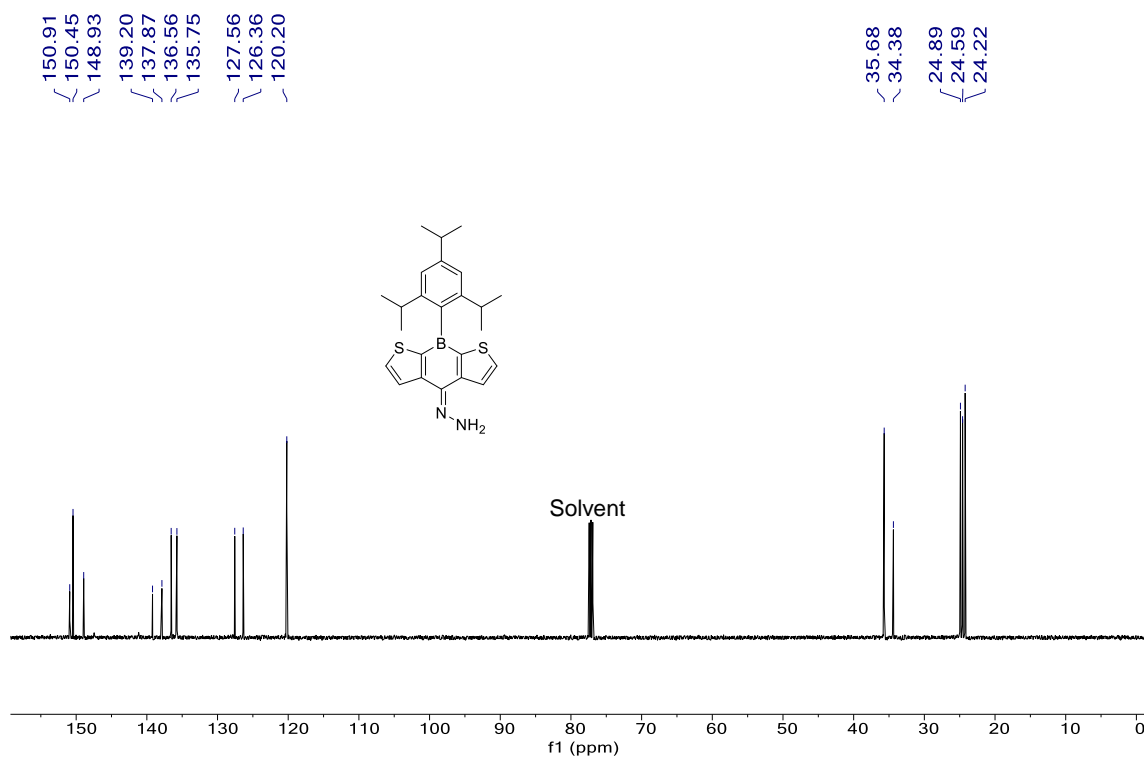

**Figure S47**  $^{13}\text{C}$  NMR spectrum of **7** in  $\text{CDCl}_3$  at room temperature (125 MHz).

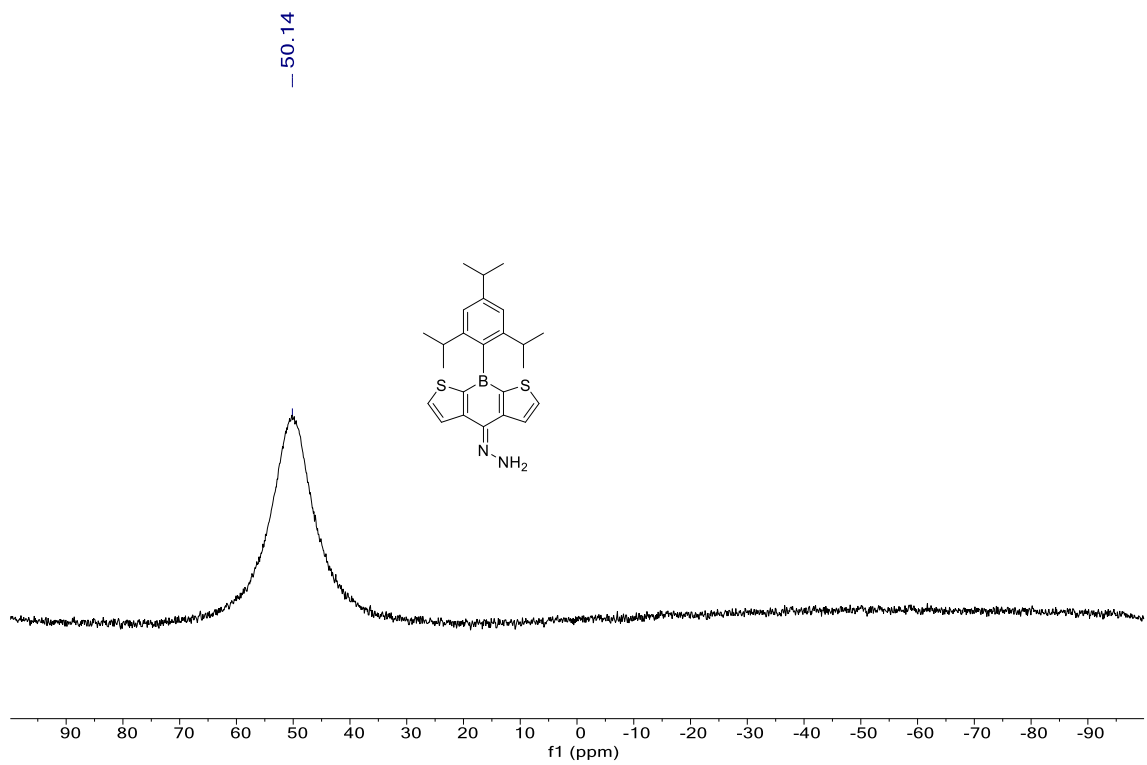

**Figure S48**  $^{11}\text{B}$  NMR spectrum of **7** in  $\text{CDCl}_3$  at room temperature (160 MHz).

- 45.52

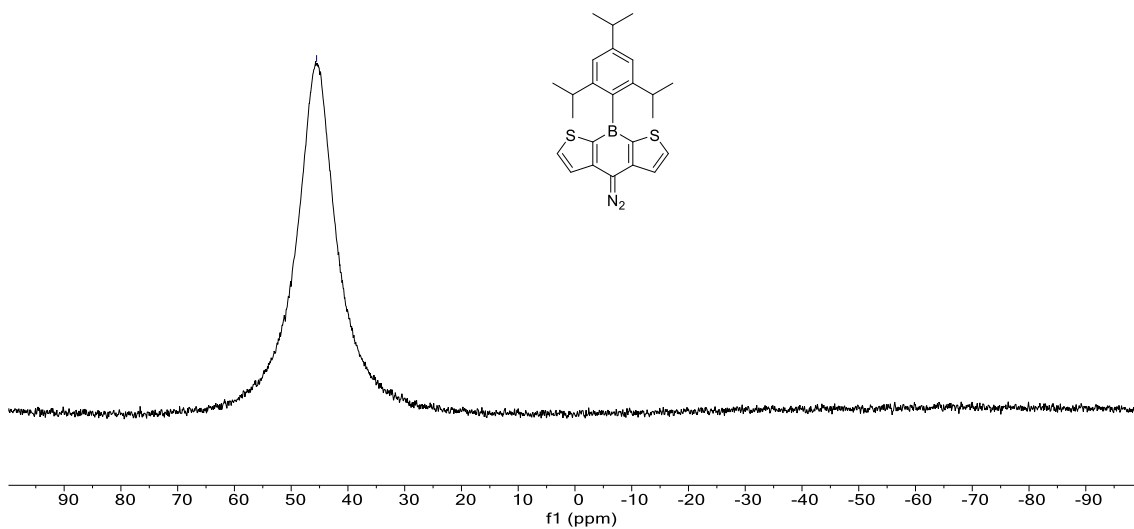

Figure S49  $^{11}\text{B}$  NMR spectrum of **8** in  $\text{CDCl}_3$  at room temperature (160 MHz).

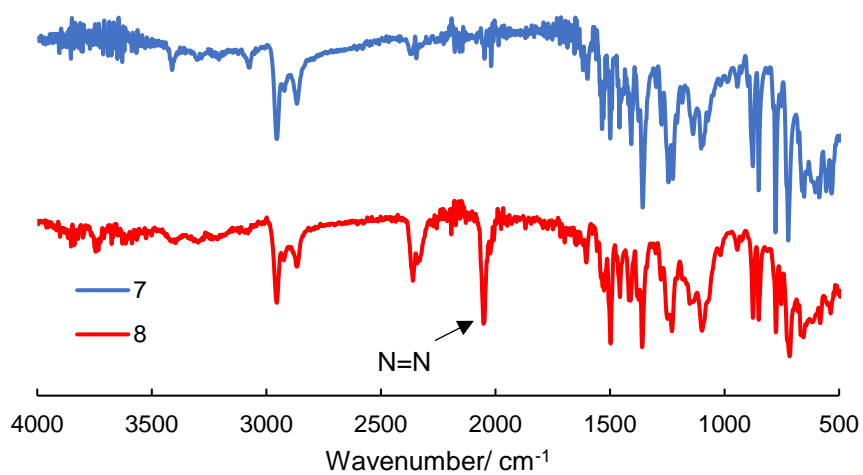

Figure S50 ATR-FTIR spectra of **4-Me** and **5-Me**.

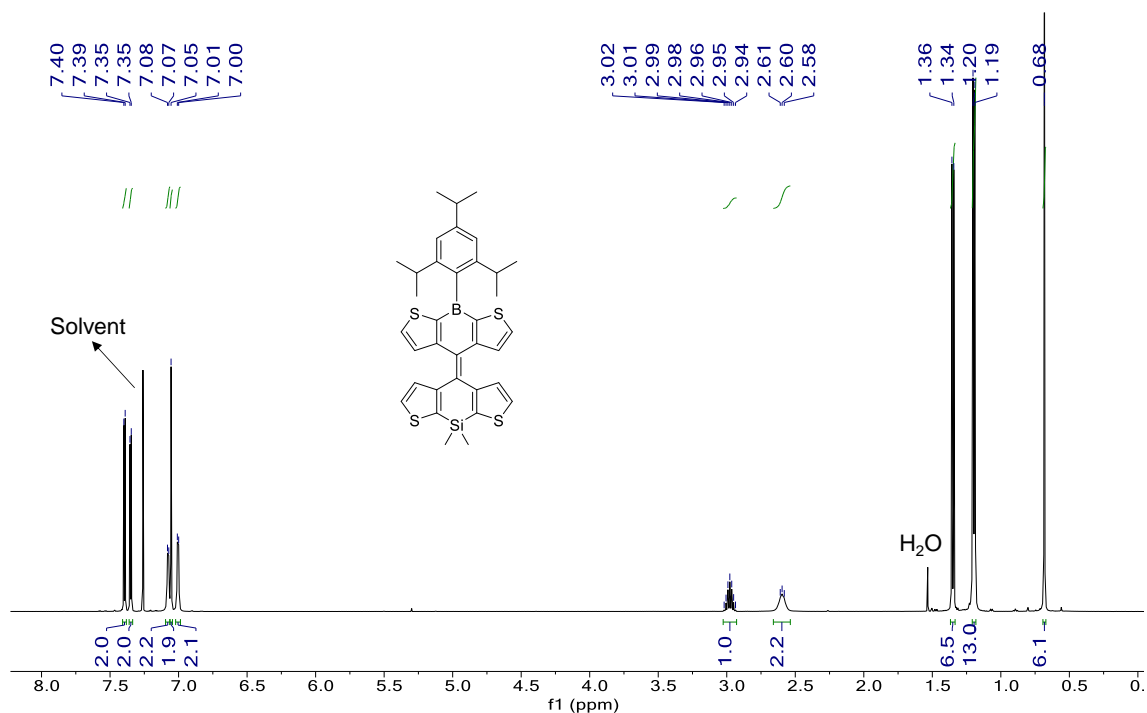

Figure S51 <sup>1</sup>H NMR spectrum of DTCS-SiMe in CDCl<sub>3</sub> at room temperature (500 MHz).

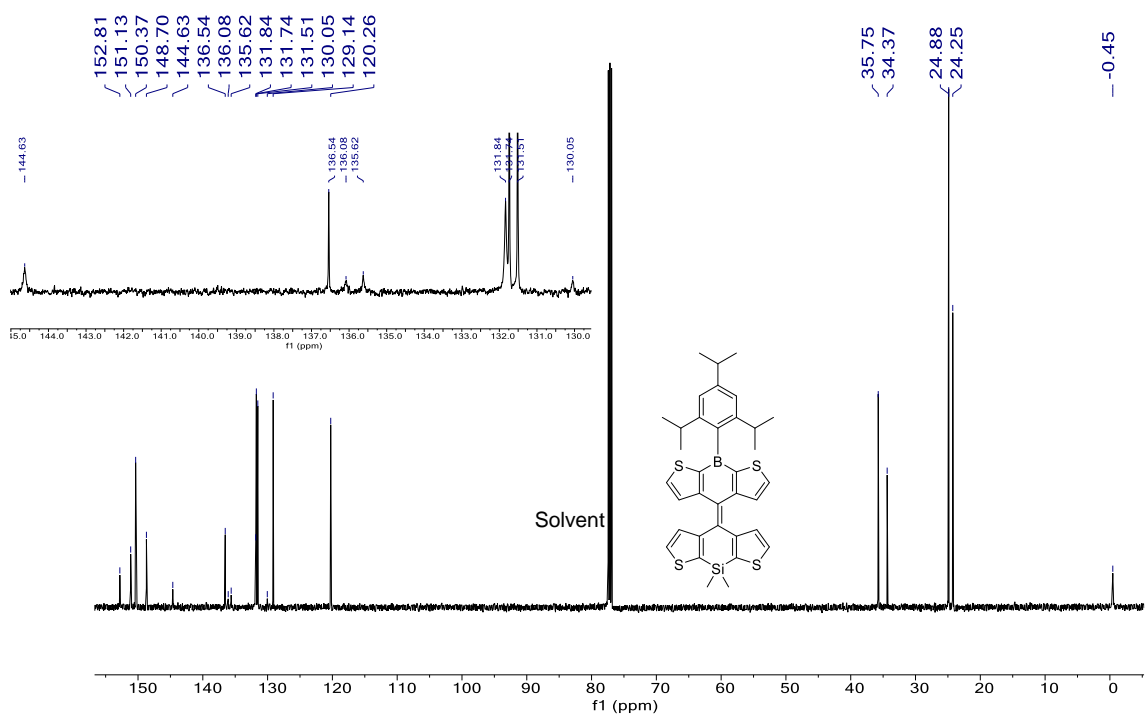

Figure S52 <sup>13</sup>C NMR spectrum of DTCS-SiMe in CDCl<sub>3</sub> at room temperature (125 MHz).



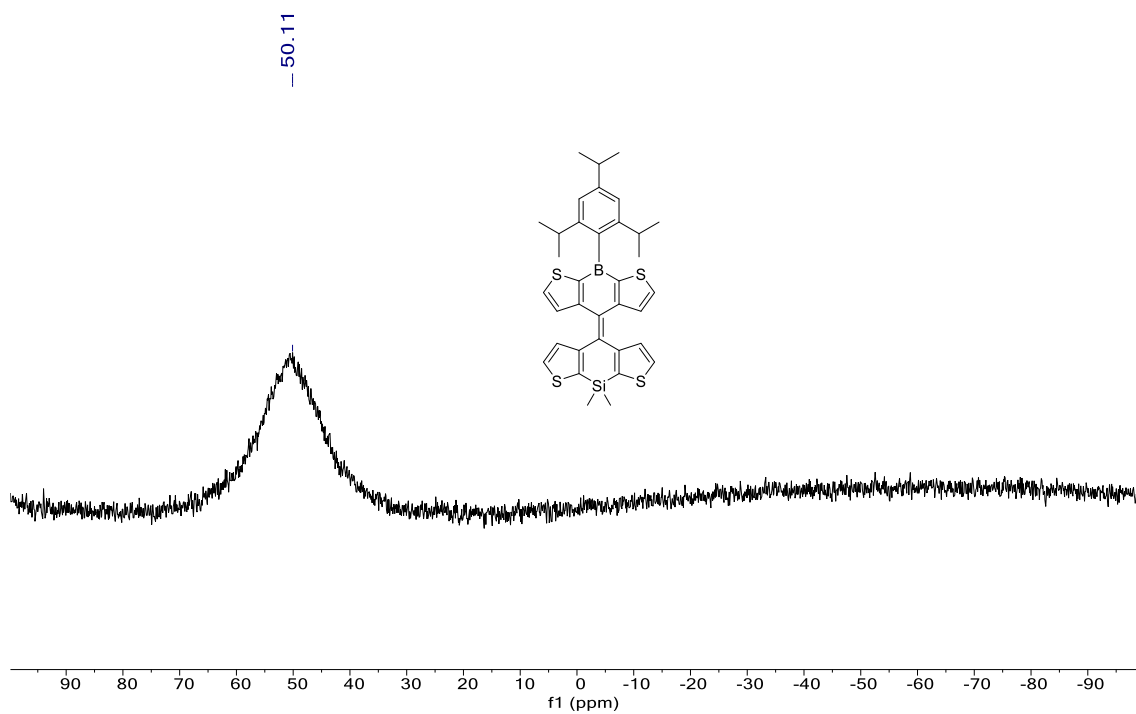

**Figure S53**  $^{11}\text{B}$  NMR spectrum of DTCB-SiMe in  $\text{CDCl}_3$  at room temperature (160 MHz).

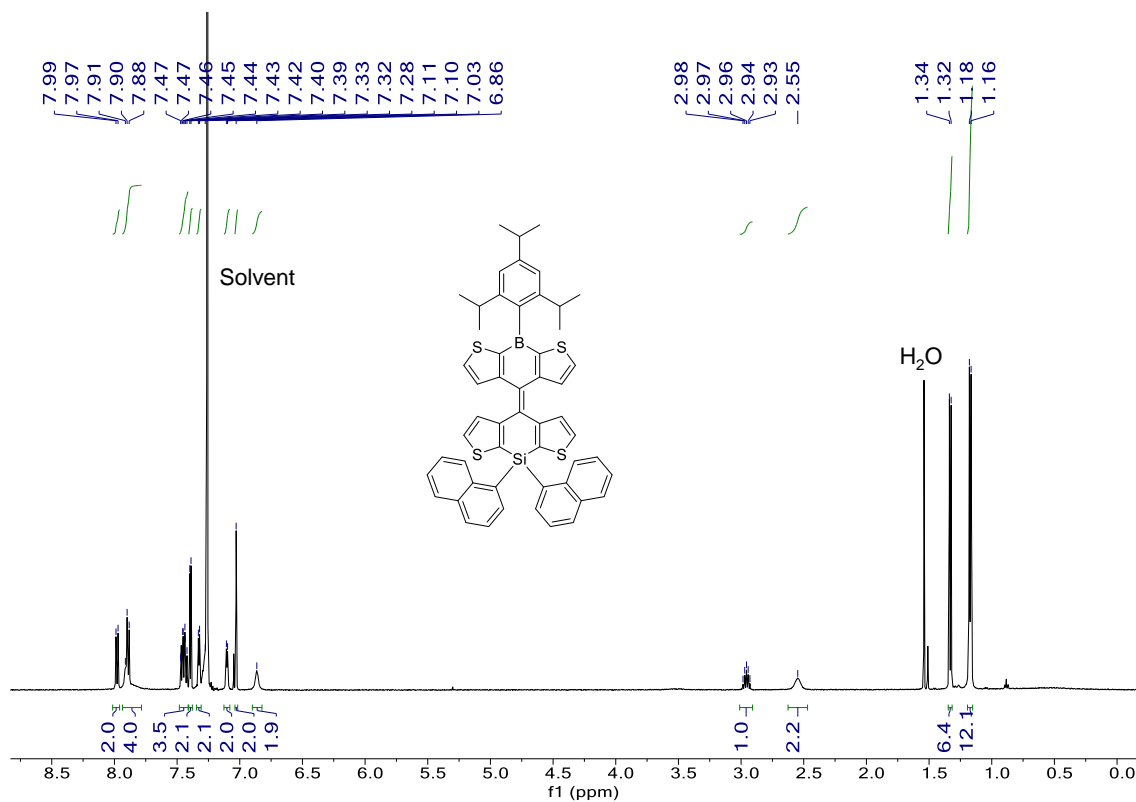

**Figure S54**  $^1\text{H}$  NMR spectrum of DTCB-SiNp in  $\text{CDCl}_3$  at room temperature (500 MHz).

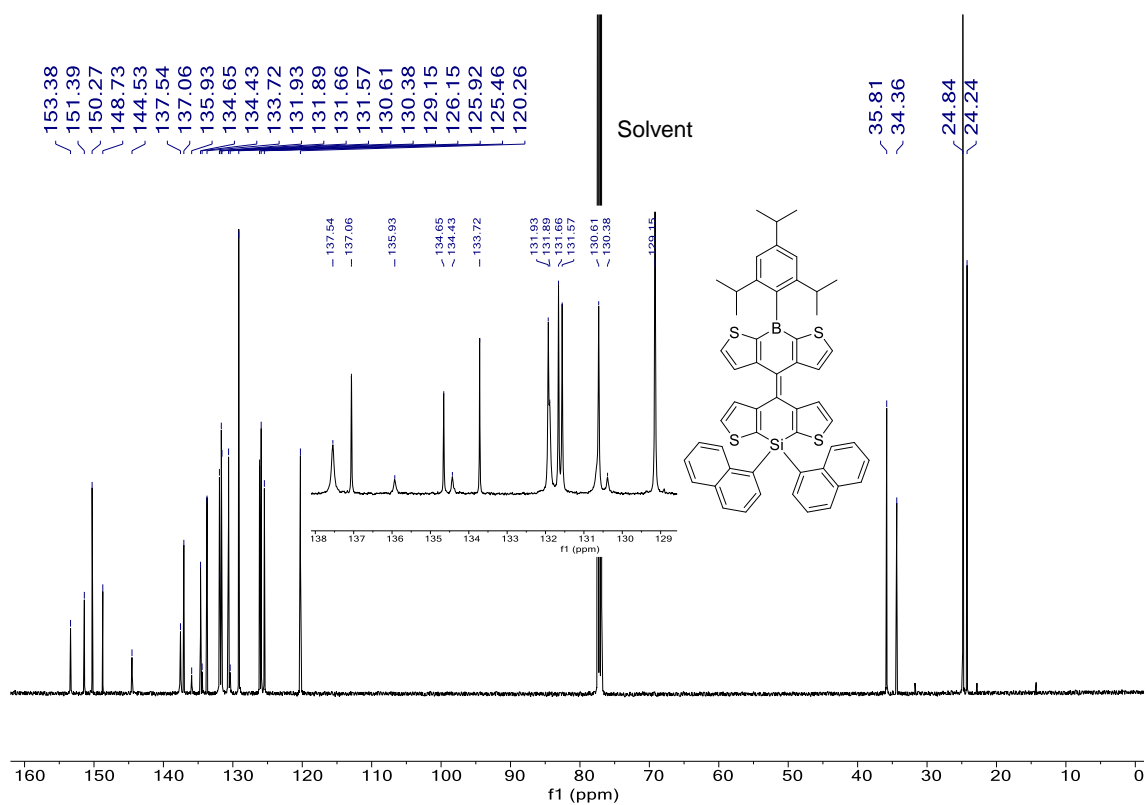

Figure S55  $^{13}\text{C}$  NMR spectrum of DTCB-SiNp in  $\text{CDCl}_3$  at room temperature (125 MHz).

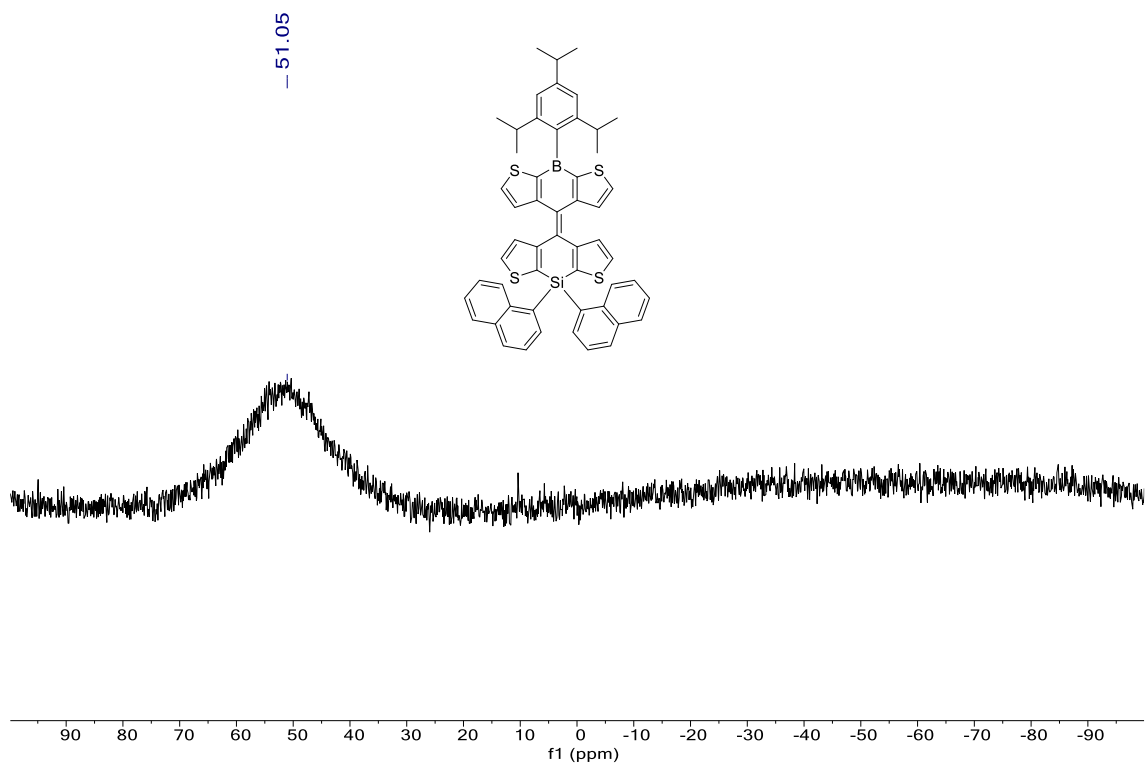

Figure S56  $^{11}\text{B}$  NMR spectrum of DTCB-SiNp in  $\text{CDCl}_3$  at room temperature (160 MHz).

**Cartesian coordinates for optimized structures**

**Table S14** Coordinates for optimized structure of the *anti*-folded conformer of **ddTCB'** in the ground state (S0).

# opt b3lyp/6-31g(d)

| Center<br>Number | Atomic<br>Number | Atomic<br>Type | Coordinates (Angstroms) |           |           |
|------------------|------------------|----------------|-------------------------|-----------|-----------|
|                  |                  |                | X                       | Y         | Z         |
| 1                | 6                | 0              | -2.705780               | 0.577843  | 1.245400  |
| 2                | 6                | 0              | -1.312194               | 0.500187  | 1.312119  |
| 3                | 6                | 0              | -0.564997               | -0.188053 | 0.224500  |
| 4                | 6                | 0              | -1.300286               | -1.360651 | -0.322686 |
| 5                | 6                | 0              | -2.693687               | -1.313819 | -0.417551 |
| 6                | 5                | 0              | -3.569400               | -0.243166 | 0.265551  |
| 7                | 6                | 0              | -0.761175               | -2.616777 | -0.740731 |
| 8                | 6                | 0              | -1.721925               | -3.481215 | -1.194287 |
| 9                | 16               | 0              | -3.302909               | -2.789745 | -1.124338 |
| 10               | 16               | 0              | -3.329593               | 1.464121  | 2.614455  |
| 11               | 6                | 0              | -1.753723               | 1.634729  | 3.300184  |
| 12               | 6                | 0              | -0.784265               | 1.080768  | 2.506964  |
| 13               | 6                | 0              | -5.133333               | -0.102148 | 0.093839  |
| 14               | 6                | 0              | 0.639731                | 0.262720  | -0.279641 |
| 15               | 6                | 0              | 1.389440                | -0.433158 | -1.358886 |
| 16               | 6                | 0              | 2.782731                | -0.504086 | -1.291542 |
| 17               | 5                | 0              | 3.649057                | 0.333152  | -0.321514 |
| 18               | 6                | 0              | 2.765720                | 1.396810  | 0.370235  |
| 19               | 6                | 0              | 1.371446                | 1.433323  | 0.274256  |
| 20               | 16               | 0              | 3.354194                | 2.854636  | 1.129994  |
| 21               | 6                | 0              | 1.767826                | 3.532986  | 1.206784  |
| 22               | 6                | 0              | 0.818893                | 2.674134  | 0.721592  |
| 23               | 6                | 0              | 0.861041                | -1.051267 | -2.535631 |
| 24               | 6                | 0              | 1.829440                | -1.634959 | -3.307155 |
| 25               | 16               | 0              | 3.405055                | -1.444892 | -2.624333 |
| 26               | 6                | 0              | 5.200616                | 0.106824  | -0.103890 |
| 27               | 6                | 0              | -5.630643               | 0.770552  | -0.904289 |
| 28               | 6                | 0              | -7.009091               | 0.917031  | -1.079449 |
| 29               | 6                | 0              | -7.929606               | 0.219100  | -0.289963 |
| 30               | 6                | 0              | -7.427580               | -0.638546 | 0.690343  |
| 31               | 6                | 0              | -6.053169               | -0.812863 | 0.898231  |
| 32               | 6                | 0              | 6.270676                | 0.740078  | -0.790234 |
| 33               | 6                | 0              | 7.587448                | 0.344424  | -0.511642 |
| 34               | 6                | 0              | 7.906761                | -0.633914 | 0.430616  |
| 35               | 6                | 0              | 6.848693                | -1.232405 | 1.114435  |
| 36               | 6                | 0              | 5.518623                | -0.885566 | 0.862162  |
| 37               | 6                | 0              | -9.431524               | 0.383245  | -0.484785 |
| 38               | 6                | 0              | -9.892917               | 1.825746  | -0.202996 |
| 39               | 6                | 0              | -9.884160               | -0.077828 | -1.883142 |
| 40               | 6                | 0              | -4.671390               | 1.559384  | -1.796494 |
| 41               | 6                | 0              | -4.813785               | 1.173409  | -3.280648 |
| 42               | 6                | 0              | -4.817883               | 3.079672  | -1.597951 |
| 43               | 6                | 0              | -5.584622               | -1.771416 | 1.994278  |
| 44               | 6                | 0              | -6.044951               | -1.318503 | 3.393355  |
| 45               | 6                | 0              | -6.028561               | -3.221679 | 1.721732  |
| 46               | 6                | 0              | 9.348345                | -1.038952 | 0.708677  |
| 47               | 6                | 0              | 10.026872               | -1.641967 | -0.535729 |
| 48               | 6                | 0              | 10.174461               | 0.131267  | 1.275544  |

|     |   |   |            |           |           |
|-----|---|---|------------|-----------|-----------|
| 49  | 6 | 0 | 4.419341   | -1.594769 | 1.658045  |
| 50  | 6 | 0 | 4.393795   | -3.110619 | 1.387413  |
| 51  | 6 | 0 | 4.521588   | -1.296096 | 3.165906  |
| 52  | 6 | 0 | 6.158700   | 1.892495  | -1.802224 |
| 53  | 6 | 0 | 4.865177   | 1.994492  | -2.618588 |
| 54  | 6 | 0 | 6.473412   | 3.242593  | -1.120363 |
| 55  | 1 | 0 | 0.287447   | -2.877530 | -0.684390 |
| 56  | 1 | 0 | -1.578402  | -4.493471 | -1.549546 |
| 57  | 1 | 0 | -1.619404  | 2.118512  | 4.259027  |
| 58  | 1 | 0 | 0.262993   | 1.066311  | 2.778799  |
| 59  | 1 | 0 | 1.614293   | 4.532906  | 1.591458  |
| 60  | 1 | 0 | -0.231549  | 2.926815  | 0.664689  |
| 61  | 1 | 0 | -0.185872  | -1.043735 | -2.808510 |
| 62  | 1 | 0 | 1.695494   | -2.153561 | -4.247673 |
| 63  | 1 | 0 | -7.375486  | 1.591819  | -1.850102 |
| 64  | 1 | 0 | -8.133123  | -1.187386 | 1.311233  |
| 65  | 1 | 0 | 8.392511   | 0.831023  | -1.059858 |
| 66  | 1 | 0 | 7.069979   | -1.995384 | 1.858312  |
| 67  | 1 | 0 | -9.924327  | -0.267887 | 0.250388  |
| 68  | 1 | 0 | -10.983139 | 1.908098  | -0.290059 |
| 69  | 1 | 0 | -9.605467  | 2.143164  | 0.805322  |
| 70  | 1 | 0 | -9.448166  | 2.532015  | -0.914186 |
| 71  | 1 | 0 | -10.974353 | -0.007429 | -1.980312 |
| 72  | 1 | 0 | -9.590396  | -1.116201 | -2.071725 |
| 73  | 1 | 0 | -9.439462  | 0.542578  | -2.670369 |
| 74  | 1 | 0 | -3.645697  | 1.298182  | -1.498303 |
| 75  | 1 | 0 | -4.078363  | 1.709754  | -3.892592 |
| 76  | 1 | 0 | -4.660436  | 0.098379  | -3.424999 |
| 77  | 1 | 0 | -5.810404  | 1.422769  | -3.663515 |
| 78  | 1 | 0 | -4.083150  | 3.622308  | -2.205188 |
| 79  | 1 | 0 | -4.666609  | 3.356655  | -0.548922 |
| 80  | 1 | 0 | -5.815146  | 3.425939  | -1.893976 |
| 81  | 1 | 0 | -4.486127  | -1.765134 | 1.997987  |
| 82  | 1 | 0 | -5.648010  | -1.989844 | 4.164528  |
| 83  | 1 | 0 | -5.701760  | -0.303163 | 3.616193  |
| 84  | 1 | 0 | -7.138329  | -1.329029 | 3.474726  |
| 85  | 1 | 0 | -5.632455  | -3.895790 | 2.490931  |
| 86  | 1 | 0 | -5.672740  | -3.570651 | 0.747075  |
| 87  | 1 | 0 | -7.121308  | -3.311387 | 1.732273  |
| 88  | 1 | 0 | 9.318943   | -1.822598 | 1.478463  |
| 89  | 1 | 0 | 11.042286  | -1.980943 | -0.297171 |
| 90  | 1 | 0 | 9.461558   | -2.498553 | -0.918813 |
| 91  | 1 | 0 | 10.103485  | -0.904787 | -1.343796 |
| 92  | 1 | 0 | 11.190594  | -0.197022 | 1.525786  |
| 93  | 1 | 0 | 9.713658   | 0.538290  | 2.182248  |
| 94  | 1 | 0 | 10.258176  | 0.947928  | 0.548619  |
| 95  | 1 | 0 | 3.448416   | -1.201254 | 1.328194  |
| 96  | 1 | 0 | 3.566324   | -3.585717 | 1.928424  |
| 97  | 1 | 0 | 4.268324   | -3.317489 | 0.319034  |
| 98  | 1 | 0 | 5.323542   | -3.590973 | 1.713836  |
| 99  | 1 | 0 | 3.694047   | -1.767412 | 3.710037  |
| 100 | 1 | 0 | 4.486977   | -0.217959 | 3.356979  |
| 101 | 1 | 0 | 5.458225   | -1.679733 | 3.586952  |
| 102 | 1 | 0 | 6.964371   | 1.719192  | -2.529791 |
| 103 | 1 | 0 | 4.954374   | 2.815648  | -3.340080 |
| 104 | 1 | 0 | 4.663888   | 1.078047  | -3.179410 |
| 105 | 1 | 0 | 3.990700   | 2.214069  | -1.996835 |

|     |   |   |          |          |           |
|-----|---|---|----------|----------|-----------|
| 106 | 1 | 0 | 6.518727 | 4.046736 | -1.865381 |
| 107 | 1 | 0 | 7.434552 | 3.208854 | -0.596486 |
| 108 | 1 | 0 | 5.702383 | 3.504836 | -0.388830 |

**Table S15** Coordinates for optimized structure of the twisted conformer of **ddTCB'** in the ground state (S0).

# opt b3lyp/6-31g(d)

| Center<br>Number | Atomic<br>Number | Atomic<br>Type | Coordinates (Angstroms) |           |           |
|------------------|------------------|----------------|-------------------------|-----------|-----------|
|                  |                  |                | X                       | Y         | Z         |
| 1                | 6                | 0              | -2.881197               | -1.179165 | 0.458483  |
| 2                | 6                | 0              | -1.476957               | -1.171109 | 0.484041  |
| 3                | 6                | 0              | -0.708800               | -0.028652 | -0.012450 |
| 4                | 6                | 0              | -1.458728               | 1.113980  | -0.535666 |
| 5                | 6                | 0              | -2.862983               | 1.122625  | -0.559109 |
| 6                | 5                | 0              | -3.749112               | -0.027982 | -0.065340 |
| 7                | 6                | 0              | -0.900420               | 2.230102  | -1.252499 |
| 8                | 6                | 0              | -1.848841               | 3.076447  | -1.747676 |
| 9                | 16               | 0              | -3.454896               | 2.528164  | -1.402692 |
| 10               | 16               | 0              | -3.502766               | -2.584648 | 1.280538  |
| 11               | 6                | 0              | -1.909955               | -3.133625 | 1.681299  |
| 12               | 6                | 0              | -0.944475               | -2.287592 | 1.219682  |
| 13               | 6                | 0              | -5.328544               | -0.027389 | -0.092318 |
| 14               | 6                | 0              | 0.708799                | -0.028662 | 0.012457  |
| 15               | 6                | 0              | 1.458735                | 1.113663  | 0.536336  |
| 16               | 6                | 0              | 2.862989                | 1.122290  | 0.559777  |
| 17               | 5                | 0              | 3.749112                | -0.028034 | 0.065338  |
| 18               | 6                | 0              | 2.881191                | -1.178902 | -0.459168 |
| 19               | 6                | 0              | 1.476952                | -1.170829 | -0.484712 |
| 20               | 16               | 0              | 3.502754                | -2.583899 | -1.282059 |
| 21               | 6                | 0              | 1.909939                | -3.132638 | -1.683131 |
| 22               | 6                | 0              | 0.944463                | -2.286876 | -1.221008 |
| 23               | 6                | 0              | 0.900435                | 2.229371  | 1.253817  |
| 24               | 6                | 0              | 1.848861                | 3.075428  | 1.749476  |
| 25               | 16               | 0              | 3.454912                | 2.527344  | 1.404159  |
| 26               | 6                | 0              | 5.328545                | -0.027461 | 0.092304  |
| 27               | 6                | 0              | -6.066547               | 0.567292  | 0.959660  |
| 28               | 6                | 0              | -7.464017               | 0.558119  | 0.919280  |
| 29               | 6                | 0              | -8.168706               | -0.024558 | -0.139609 |
| 30               | 6                | 0              | -7.429911               | -0.607089 | -1.171502 |
| 31               | 6                | 0              | -6.030042               | -0.620104 | -1.167138 |
| 32               | 6                | 0              | 6.066538                | 0.568022  | -0.959227 |
| 33               | 6                | 0              | 7.464008                | 0.558822  | -0.918864 |
| 34               | 6                | 0              | 8.168706                | -0.024662 | 0.139573  |
| 35               | 6                | 0              | 7.429921                | -0.607980 | 1.171029  |
| 36               | 6                | 0              | 6.030052                | -0.620993 | 1.166668  |
| 37               | 6                | 0              | 5.283713                | -1.266331 | 2.334571  |
| 38               | 6                | 0              | 5.589426                | -2.771035 | 2.456148  |
| 39               | 6                | 0              | 5.555438                | -0.536165 | 3.663732  |
| 40               | 6                | 0              | 9.691705                | -0.028572 | 0.175807  |
| 41               | 6                | 0              | 10.293115               | -0.817751 | -1.002551 |
| 42               | 6                | 0              | 10.268816               | 1.398415  | 0.236169  |
| 43               | 6                | 0              | 5.356296                | 1.211806  | -2.150747 |
| 44               | 6                | 0              | 5.659931                | 2.717778  | -2.261034 |

|     |   |   |            |           |           |
|-----|---|---|------------|-----------|-----------|
| 45  | 6 | 0 | 5.673577   | 0.483899  | -3.470982 |
| 46  | 6 | 0 | -9.691704  | -0.028438 | -0.175862 |
| 47  | 6 | 0 | -10.293131 | -0.818486 | 1.001905  |
| 48  | 6 | 0 | -10.268808 | 1.398596  | -0.235176 |
| 49  | 6 | 0 | -5.356319  | 1.210162  | 2.151682  |
| 50  | 6 | 0 | -5.659969  | 2.716045  | 2.263133  |
| 51  | 6 | 0 | -5.673604  | 0.481232  | 3.471351  |
| 52  | 6 | 0 | -5.283691  | -1.264547 | -2.335528 |
| 53  | 6 | 0 | -5.589398  | -2.769159 | -2.458258 |
| 54  | 6 | 0 | -5.555407  | -0.533366 | -3.664133 |
| 55  | 1 | 0 | 0.159993   | 2.386803  | -1.401339 |
| 56  | 1 | 0 | -1.686379  | 3.985607  | -2.312014 |
| 57  | 1 | 0 | -1.767652  | -4.043001 | 2.250710  |
| 58  | 1 | 0 | 0.110046   | -2.444807 | 1.405296  |
| 59  | 1 | 0 | 1.767630   | -4.041678 | -2.253078 |
| 60  | 1 | 0 | -0.110059  | -2.443981 | -1.406708 |
| 61  | 1 | 0 | -0.159977  | 2.385990  | 1.402754  |
| 62  | 1 | 0 | 1.686405   | 3.984264  | 2.314338  |
| 63  | 1 | 0 | -8.018514  | 1.015959  | 1.735570  |
| 64  | 1 | 0 | -7.965350  | -1.061859 | -2.002956 |
| 65  | 1 | 0 | 8.018499   | 1.017287  | -1.734809 |
| 66  | 1 | 0 | 7.965368   | -1.063384 | 2.002130  |
| 67  | 1 | 0 | 4.207361   | -1.174117 | 2.133768  |
| 68  | 1 | 0 | 5.002847   | -3.219966 | 3.267018  |
| 69  | 1 | 0 | 5.348671   | -3.299588 | 1.527373  |
| 70  | 1 | 0 | 6.649065   | -2.946892 | 2.676218  |
| 71  | 1 | 0 | 4.966259   | -0.979623 | 4.475689  |
| 72  | 1 | 0 | 5.293911   | 0.525136  | 3.592216  |
| 73  | 1 | 0 | 6.613026   | -0.601961 | 3.945535  |
| 74  | 1 | 0 | 9.990143   | -0.542083 | 1.100249  |
| 75  | 1 | 0 | 11.386276  | -0.859045 | -0.923570 |
| 76  | 1 | 0 | 9.912941   | -1.844888 | -1.025938 |
| 77  | 1 | 0 | 10.046545  | -0.349188 | -1.962760 |
| 78  | 1 | 0 | 11.361908  | 1.371171  | 0.321927  |
| 79  | 1 | 0 | 9.871996   | 1.949639  | 1.095685  |
| 80  | 1 | 0 | 10.020133  | 1.966867  | -0.667898 |
| 81  | 1 | 0 | 4.274309   | 1.115572  | -1.985349 |
| 82  | 1 | 0 | 5.098292   | 3.165380  | -3.090094 |
| 83  | 1 | 0 | 5.387277   | 3.244478  | -1.340069 |
| 84  | 1 | 0 | 6.725469   | 2.898008  | -2.446434 |
| 85  | 1 | 0 | 5.109091   | 0.925624  | -4.301216 |
| 86  | 1 | 0 | 5.414351   | -0.578540 | -3.408737 |
| 87  | 1 | 0 | 6.739399   | 0.554147  | -3.718658 |
| 88  | 1 | 0 | -9.990133  | -0.541263 | -1.100686 |
| 89  | 1 | 0 | -11.386291 | -0.859720 | 0.922877  |
| 90  | 1 | 0 | -9.912959  | -1.845639 | 1.024540  |
| 91  | 1 | 0 | -10.046577 | -0.350631 | 1.962463  |
| 92  | 1 | 0 | -11.361900 | 1.371420  | -0.320963 |
| 93  | 1 | 0 | -9.871978  | 1.950452  | -1.094282 |
| 94  | 1 | 0 | -10.020130 | 1.966379  | 0.669313  |
| 95  | 1 | 0 | -4.274330  | 1.114066  | 1.986219  |
| 96  | 1 | 0 | -5.098344  | 3.163009  | 3.092546  |
| 97  | 1 | 0 | -5.387309  | 3.243461  | 1.342580  |
| 98  | 1 | 0 | -6.725511  | 2.896122  | 2.448660  |
| 99  | 1 | 0 | -5.109129  | 0.922319  | 4.301932  |
| 100 | 1 | 0 | -5.414369  | -0.581157 | 3.408287  |
| 101 | 1 | 0 | -6.739429  | 0.551278  | 3.719071  |

|     |   |   |           |           |           |
|-----|---|---|-----------|-----------|-----------|
| 102 | 1 | 0 | -4.207342 | -1.172482 | -2.134645 |
| 103 | 1 | 0 | -5.002812 | -3.217469 | -3.269466 |
| 104 | 1 | 0 | -5.348648 | -3.298421 | -1.529885 |
| 105 | 1 | 0 | -6.649035 | -2.944852 | -2.678469 |
| 106 | 1 | 0 | -4.966215 | -0.976199 | -4.476423 |
| 107 | 1 | 0 | -5.293888 | 0.527882  | -3.591802 |
| 108 | 1 | 0 | -6.612991 | -0.598954 | -3.945999 |

**Table S16** Coordinates for optimized structure of the *anti*-folded conformer of **dDTCC** in the ground state (S0).

# opt b3lyp/6-31g(d)

| Center<br>Number | Atomic<br>Number | Atomic<br>Type | Coordinates (Angstroms) |           |           |
|------------------|------------------|----------------|-------------------------|-----------|-----------|
|                  |                  |                | X                       | Y         | Z         |
| 1                | 6                | 0              | -2.820939               | 1.201806  | -0.014321 |
| 2                | 6                | 0              | -1.490232               | 1.221779  | 0.350573  |
| 3                | 6                | 0              | -0.665723               | 0.000106  | 0.162384  |
| 4                | 6                | 0              | -1.490274               | -1.221565 | 0.350583  |
| 5                | 6                | 0              | -2.820831               | -1.201458 | -0.014351 |
| 6                | 6                | 0              | -3.523075               | 0.000114  | -0.628938 |
| 7                | 6                | 0              | -1.123789               | -2.457206 | 0.988874  |
| 8                | 6                | 0              | -2.151409               | -3.349312 | 1.058824  |
| 9                | 16               | 0              | -3.610244               | -2.708410 | 0.364024  |
| 10               | 16               | 0              | -3.610052               | 2.708467  | 0.364195  |
| 11               | 6                | 0              | -2.151392               | 3.349459  | 1.059100  |
| 12               | 6                | 0              | -1.123751               | 2.457345  | 0.988945  |
| 13               | 6                | 0              | 0.665705                | 0.000055  | -0.162477 |
| 14               | 6                | 0              | 1.490189                | -1.221652 | -0.350670 |
| 15               | 6                | 0              | 2.820736                | -1.201664 | 0.014424  |
| 16               | 6                | 0              | 3.522940                | -0.000072 | 0.629102  |
| 17               | 6                | 0              | 2.820876                | 1.201588  | 0.014403  |
| 18               | 6                | 0              | 1.490336                | 1.221655  | -0.350727 |
| 19               | 16               | 0              | 3.610426                | 2.708326  | -0.364141 |
| 20               | 6                | 0              | 2.151746                | 3.349186  | -1.059304 |
| 21               | 6                | 0              | 1.124024                | 2.457202  | -0.989304 |
| 22               | 6                | 0              | 1.123706                | -2.457219 | -0.989086 |
| 23               | 6                | 0              | 2.151280                | -3.349378 | -1.058983 |
| 24               | 16               | 0              | 3.610081                | -2.708561 | -0.363965 |
| 25               | 6                | 0              | -3.321915               | 0.000030  | -2.171455 |
| 26               | 6                | 0              | -5.033961               | -0.000015 | -0.321496 |
| 27               | 6                | 0              | 3.321526                | -0.000052 | 2.171586  |
| 28               | 6                | 0              | 5.033851                | -0.000126 | 0.321859  |
| 29               | 1                | 0              | -0.139813               | -2.655398 | 1.393566  |
| 30               | 1                | 0              | -2.149062               | -4.339946 | 1.493260  |
| 31               | 1                | 0              | -2.149153               | 4.339892  | 1.493982  |
| 32               | 1                | 0              | -0.139733               | 2.655422  | 1.393574  |
| 33               | 1                | 0              | 2.149564                | 4.339790  | -1.493790 |
| 34               | 1                | 0              | 0.140079                | 2.655403  | -1.394077 |
| 35               | 1                | 0              | 0.139758                | -2.655294 | -1.393922 |
| 36               | 1                | 0              | 2.148932                | -4.340032 | -1.493362 |
| 37               | 1                | 0              | -3.783190               | 0.889549  | -2.615486 |
| 38               | 1                | 0              | -3.783122               | -0.889579 | -2.615385 |
| 39               | 1                | 0              | -2.257781               | 0.000062  | -2.424048 |
| 40               | 1                | 0              | -5.225062               | -0.000120 | 0.755507  |

|    |   |   |           |           |           |
|----|---|---|-----------|-----------|-----------|
| 41 | 1 | 0 | -5.515065 | 0.881715  | -0.759270 |
| 42 | 1 | 0 | -5.515064 | -0.881668 | -0.759430 |
| 43 | 1 | 0 | 3.782694  | -0.889613 | 2.615646  |
| 44 | 1 | 0 | 2.257361  | -0.000039 | 2.424058  |
| 45 | 1 | 0 | 3.782708  | 0.889511  | 2.615629  |
| 46 | 1 | 0 | 5.514817  | -0.881862 | 0.759765  |
| 47 | 1 | 0 | 5.225122  | -0.000095 | -0.755114 |
| 48 | 1 | 0 | 5.514889  | 0.881540  | 0.759828  |

**Table S17** Coordinates for optimized structure of the twisted conformer of **ddTCC** in the ground state (S<sub>0</sub>).

# opt b3lyp/6-31g(d)

| Center<br>Number | Atomic<br>Number | Atomic<br>Type | Coordinates (Angstroms) |           |           |
|------------------|------------------|----------------|-------------------------|-----------|-----------|
|                  |                  |                | X                       | Y         | Z         |
| 1                | 6                | 0              | 2.881302                | -1.116432 | -0.478555 |
| 2                | 6                | 0              | 1.495922                | -1.144767 | -0.461658 |
| 3                | 6                | 0              | 0.699958                | 0.000052  | 0.000267  |
| 4                | 6                | 0              | 1.496408                | 1.144609  | 0.461939  |
| 5                | 6                | 0              | 2.881791                | 1.116061  | 0.478014  |
| 6                | 6                | 0              | 3.785385                | -0.000300 | -0.000468 |
| 7                | 6                | 0              | 0.987075                | 2.309575  | 1.151297  |
| 8                | 6                | 0              | 1.957815                | 3.141891  | 1.607767  |
| 9                | 16               | 0              | 3.547241                | 2.528133  | 1.264092  |
| 10               | 16               | 0              | 3.546099                | -2.528688 | -1.264853 |
| 11               | 6                | 0              | 1.956379                | -3.142292 | -1.607456 |
| 12               | 6                | 0              | 0.986025                | -2.309776 | -1.150536 |
| 13               | 6                | 0              | -0.699958               | 0.000261  | 0.000427  |
| 14               | 6                | 0              | -1.496124               | 1.145046  | -0.461197 |
| 15               | 6                | 0              | -2.881510               | 1.116454  | -0.478020 |
| 16               | 6                | 0              | -3.785384               | -0.000415 | -0.001201 |
| 17               | 6                | 0              | -2.881583               | -1.116038 | 0.478550  |
| 18               | 6                | 0              | -1.496207               | -1.144329 | 0.462401  |
| 19               | 16               | 0              | -3.546738               | -2.527867 | 1.265297  |
| 20               | 6                | 0              | -1.957169               | -3.141219 | 1.609085  |
| 21               | 6                | 0              | -0.986612               | -2.308916 | 1.152211  |
| 22               | 6                | 0              | -0.986489               | 2.310434  | -1.149624 |
| 23               | 6                | 0              | -1.957027               | 3.142962  | -1.606141 |
| 24               | 16               | 0              | -3.546603               | 2.528953  | -1.263648 |
| 25               | 6                | 0              | 4.690889                | 0.504132  | -1.160030 |
| 26               | 6                | 0              | 4.691168                | -0.505010 | 1.158782  |
| 27               | 6                | 0              | -4.693523               | 0.503438  | 1.156500  |
| 28               | 6                | 0              | -4.688528               | -0.505702 | -1.162307 |
| 29               | 1                | 0              | -0.066405               | 2.500017  | 1.305532  |
| 30               | 1                | 0              | 1.840774                | 4.075707  | 2.141087  |
| 31               | 1                | 0              | 1.838894                | -4.076147 | -2.140608 |
| 32               | 1                | 0              | -0.067563               | -2.500141 | -1.304086 |
| 33               | 1                | 0              | -1.839939               | -4.074707 | 2.142936  |
| 34               | 1                | 0              | 0.066916                | -2.499085 | 1.306455  |
| 35               | 1                | 0              | 0.067051                | 2.501072  | -1.303165 |
| 36               | 1                | 0              | -1.839732               | 4.077144  | -2.138763 |
| 37               | 1                | 0              | 5.356486                | -0.292109 | -1.510373 |
| 38               | 1                | 0              | 5.312778                | 1.339982  | -0.821567 |
| 39               | 1                | 0              | 4.084917                | 0.844615  | -2.004813 |
| 40               | 1                | 0              | 4.085390                | -0.845260 | 2.003797  |
| 41               | 1                | 0              | 5.312635                | -1.341084 | 0.820101  |



|    |   |   |           |           |           |
|----|---|---|-----------|-----------|-----------|
| 42 | 1 | 0 | 5.357159  | 0.291019  | 1.508849  |
| 43 | 1 | 0 | -5.315297 | 1.338867  | 0.816791  |
| 44 | 1 | 0 | -4.089501 | 0.844325  | 2.002516  |
| 45 | 1 | 0 | -5.359341 | -0.293209 | 1.505498  |
| 46 | 1 | 0 | -5.354293 | 0.289921  | -1.513722 |
| 47 | 1 | 0 | -4.080802 | -0.845549 | -2.006085 |
| 48 | 1 | 0 | -5.310109 | -1.342195 | -0.824872 |

**Table S18** Coordinates for optimized structure of the *anti*-folded conformer of **dDTCSi** in the ground state (S0).

# opt b3lyp/6-31g(d)

| Center<br>Number | Atomic<br>Number | Atomic<br>Type | Coordinates (Angstroms) |           |           |
|------------------|------------------|----------------|-------------------------|-----------|-----------|
|                  |                  |                | X                       | Y         | Z         |
| 1                | 6                | 0              | 2.711592                | -1.338706 | -0.152557 |
| 2                | 6                | 0              | 1.393612                | -1.133441 | -0.331324 |
| 3                | 6                | 0              | 0.677892                | 0.000043  | -0.094648 |
| 4                | 6                | 0              | 1.393601                | 1.133593  | -0.331306 |
| 5                | 6                | 0              | 2.711540                | 1.338830  | -0.152452 |
| 6                | 14               | 0              | 3.800819                | 0.000065  | 0.543015  |
| 7                | 6                | 0              | 0.971601                | 2.261799  | -0.930349 |
| 8                | 6                | 0              | 1.964379                | 3.151070  | -1.054597 |
| 9                | 16               | 0              | 3.227962                | 2.665195  | -0.502855 |
| 10               | 16               | 0              | 3.228165                | -2.665013 | -0.502973 |
| 11               | 6                | 0              | 1.964573                | -3.151109 | -1.054559 |
| 12               | 6                | 0              | 0.971696                | -2.261683 | -0.930329 |
| 13               | 6                | 0              | -0.677172               | 0.000027  | 0.092045  |
| 14               | 6                | 0              | -1.392488               | 1.134008  | 0.327993  |
| 15               | 6                | 0              | -2.710831               | 1.339184  | 0.151903  |
| 16               | 14               | 0              | -3.803409               | -0.000199 | -0.537125 |
| 17               | 6                | 0              | -2.710661               | -1.339404 | 0.151970  |
| 18               | 6                | 0              | -1.392338               | -1.134000 | 0.328088  |
| 19               | 16               | 0              | -3.225993               | -2.666573 | 0.500657  |
| 20               | 6                | 0              | -1.961370               | -3.153161 | 1.049233  |
| 21               | 6                | 0              | -0.969123               | -2.263235 | 0.924465  |
| 22               | 6                | 0              | -0.969508               | 2.263489  | 0.924245  |
| 23               | 6                | 0              | -1.961826               | 3.153185  | 1.049053  |
| 24               | 16               | 0              | -3.226464               | 2.666368  | 0.500583  |
| 25               | 6                | 0              | 5.529302                | -0.000004 | -0.169556 |
| 26               | 6                | 0              | 3.771519                | 0.000121  | 2.414062  |
| 27               | 6                | 0              | -5.527119               | -0.000085 | 0.187315  |
| 28               | 6                | 0              | -3.787318               | -0.000229 | -2.408273 |
| 29               | 1                | 0              | -0.026382               | 2.452673  | -1.349554 |
| 30               | 1                | 0              | 1.864176                | 4.129046  | -1.545326 |
| 31               | 1                | 0              | 1.864225                | -4.128985 | -1.545293 |
| 32               | 1                | 0              | -0.026296               | -2.452682 | -1.349488 |
| 33               | 1                | 0              | -1.859879               | -4.131652 | 1.538540  |
| 34               | 1                | 0              | 0.029484                | -2.454761 | 1.341812  |
| 35               | 1                | 0              | 0.029114                | 2.455271  | 1.341595  |
| 36               | 1                | 0              | -1.860607               | 4.131763  | 1.538303  |
| 37               | 1                | 0              | 5.456883                | -0.000020 | -1.279584 |
| 38               | 1                | 0              | 6.057305                | -0.912270 | 0.185572  |
| 39               | 1                | 0              | 6.057387                | 0.912378  | 0.185443  |
| 40               | 1                | 0              | 4.293441                | 0.914356  | 2.773224  |

|    |   |   |           |           |           |
|----|---|---|-----------|-----------|-----------|
| 41 | 1 | 0 | 2.710780  | 0.000130  | 2.749885  |
| 42 | 1 | 0 | 4.293512  | -0.914116 | 2.773232  |
| 43 | 1 | 0 | -6.057557 | -0.912455 | -0.164062 |
| 44 | 1 | 0 | -6.057453 | 0.912272  | -0.164249 |
| 45 | 1 | 0 | -5.446900 | 0.000040  | 1.296802  |
| 46 | 1 | 0 | -4.312040 | 0.914071  | -2.763378 |
| 47 | 1 | 0 | -2.728992 | -0.000120 | -2.751579 |
| 48 | 1 | 0 | -4.311964 | -0.914461 | -2.763451 |

**Table S19** Coordinates for optimized structure of the twisted conformer of **ddTCSi** in the ground state (S0).

# opt b3lyp/6-31g(d)

| Center<br>Number | Atomic<br>Number | Atomic<br>Type | Coordinates (Angstroms) |           |           |
|------------------|------------------|----------------|-------------------------|-----------|-----------|
|                  |                  |                | X                       | Y         | Z         |
| 1                | 6                | 0              | -2.837522               | -1.291760 | 0.550047  |
| 2                | 6                | 0              | -1.445902               | -1.159832 | 0.532443  |
| 3                | 6                | 0              | -0.707826               | 0.000197  | 0.000507  |
| 4                | 6                | 0              | -1.445455               | 1.160559  | -0.531339 |
| 5                | 6                | 0              | -2.837096               | 1.292316  | -0.549916 |
| 6                | 14               | 0              | -4.058070               | -0.000026 | -0.001101 |
| 7                | 6                | 0              | -0.807536               | 2.222473  | -1.282304 |
| 8                | 6                | 0              | -1.675342               | 3.134474  | -1.792624 |
| 9                | 16               | 0              | -3.319467               | 2.720603  | -1.424708 |
| 10               | 16               | 0              | -3.320360               | -2.719464 | 1.425505  |
| 11               | 6                | 0              | -1.676451               | -3.132877 | 1.794951  |
| 12               | 6                | 0              | -0.808387               | -2.221133 | 1.284612  |
| 13               | 6                | 0              | 0.707825                | -0.000152 | 0.000499  |
| 14               | 6                | 0              | 1.445928                | 1.159862  | 0.532434  |
| 15               | 6                | 0              | 2.837552                | 1.291766  | 0.550015  |
| 16               | 14               | 0              | 4.058070                | -0.000004 | -0.001120 |
| 17               | 6                | 0              | 2.837066                | -1.292311 | -0.549947 |
| 18               | 6                | 0              | 1.445429                | -1.160528 | -0.531348 |
| 19               | 16               | 0              | 3.319396                | -2.720606 | -1.424748 |
| 20               | 6                | 0              | 1.675256                | -3.134452 | -1.792629 |
| 21               | 6                | 0              | 0.807476                | -2.222436 | -1.282293 |
| 22               | 6                | 0              | 0.808447                | 2.221170  | 1.284623  |
| 23               | 6                | 0              | 1.676537                | 3.132899  | 1.794945  |
| 24               | 16               | 0              | 3.320431                | 2.719463  | 1.425464  |
| 25               | 6                | 0              | -5.156671               | 0.568473  | 1.428429  |
| 26               | 6                | 0              | -5.153545               | -0.569059 | -1.432832 |
| 27               | 6                | 0              | 5.153591                | 0.569000  | -1.432826 |
| 28               | 6                | 0              | 5.156625                | -0.568531 | 1.428435  |
| 29               | 1                | 0              | 0.260657                | 2.284972  | -1.440374 |
| 30               | 1                | 0              | -1.445507               | 4.017364  | -2.374409 |
| 31               | 1                | 0              | -1.446962               | -4.015275 | 2.377618  |
| 32               | 1                | 0              | 0.259712                | -2.283310 | 1.443499  |
| 33               | 1                | 0              | 1.445395                | -4.017338 | -2.374410 |
| 34               | 1                | 0              | -0.260723               | -2.284917 | -1.440337 |
| 35               | 1                | 0              | -0.259646               | 2.283366  | 1.443535  |
| 36               | 1                | 0              | 1.447074                | 4.015302  | 2.377616  |
| 37               | 1                | 0              | -5.807483               | -0.243506 | 1.774980  |
| 38               | 1                | 0              | -5.801671               | 1.400180  | 1.119448  |
| 39               | 1                | 0              | -4.554916               | 0.905037  | 2.279135  |

|    |   |   |           |           |           |
|----|---|---|-----------|-----------|-----------|
| 40 | 1 | 0 | -5.803874 | 0.242679  | -1.780847 |
| 41 | 1 | 0 | -4.549909 | -0.905538 | -2.282240 |
| 42 | 1 | 0 | -5.798917 | -1.400936 | -1.125082 |
| 43 | 1 | 0 | 5.804002  | -0.242716 | -1.780741 |
| 44 | 1 | 0 | 5.798884  | 1.400945  | -1.125096 |
| 45 | 1 | 0 | 4.549985  | 0.905376  | -2.282295 |
| 46 | 1 | 0 | 5.807345  | 0.243475  | 1.775096  |
| 47 | 1 | 0 | 4.554841  | -0.905212 | 2.279075  |
| 48 | 1 | 0 | 5.801716  | -1.400160 | 1.119431  |

**Table S20** Coordinates for optimized structure of the *anti*-folded conformer of **DTCB-CMe** in the ground state (S0).

# opt b3lyp/6-31g(d)

| Center<br>Number | Atomic<br>Number | Atomic<br>Type | Coordinates (Angstroms) |           |           |
|------------------|------------------|----------------|-------------------------|-----------|-----------|
|                  |                  |                | X                       | Y         | Z         |
| 1                | 6                | 0              | 0.675132                | 1.258888  | -0.557459 |
| 2                | 6                | 0              | -0.714176               | 1.245365  | -0.717484 |
| 3                | 6                | 0              | -1.479464               | 0.000086  | -0.454696 |
| 4                | 6                | 0              | -0.714162               | -1.245142 | -0.717682 |
| 5                | 6                | 0              | 0.675145                | -1.258669 | -0.557652 |
| 6                | 5                | 0              | 1.534232                | 0.000099  | -0.347764 |
| 7                | 6                | 0              | -1.223524               | -2.500012 | -1.180313 |
| 8                | 6                | 0              | -0.249376               | -3.452301 | -1.318095 |
| 9                | 16               | 0              | 1.312425                | -2.850938 | -0.892689 |
| 10               | 16               | 0              | 1.312396                | 2.851198  | -0.892261 |
| 11               | 6                | 0              | -0.249414               | 3.452617  | -1.317576 |
| 12               | 6                | 0              | -1.223551               | 2.500298  | -1.179934 |
| 13               | 6                | 0              | 3.092345                | 0.000072  | -0.080502 |
| 14               | 6                | 0              | 3.561776                | -0.000047 | 1.255364  |
| 15               | 6                | 0              | 4.935420                | -0.000110 | 1.512490  |
| 16               | 6                | 0              | 5.878123                | -0.000032 | 0.478648  |
| 17               | 6                | 0              | 5.403802                | 0.000108  | -0.834277 |
| 18               | 6                | 0              | 4.035345                | 0.000155  | -1.133747 |
| 19               | 6                | 0              | 7.374397                | -0.000065 | 0.764916  |
| 20               | 6                | 0              | 7.816037                | 1.269372  | 1.517540  |
| 21               | 6                | 0              | 7.816007                | -1.269476 | 1.517596  |
| 22               | 6                | 0              | 2.578941                | -0.000298 | 2.426869  |
| 23               | 6                | 0              | 2.706413                | -1.272131 | 3.286206  |
| 24               | 6                | 0              | 2.707455                | 1.270261  | 3.287918  |
| 25               | 6                | 0              | 3.595826                | 0.000339  | -2.598802 |
| 26               | 6                | 0              | 4.061514                | 1.267780  | -3.341130 |
| 27               | 6                | 0              | 4.061525                | -1.266894 | -3.341476 |
| 28               | 6                | 0              | -2.748795               | 0.000029  | 0.080504  |
| 29               | 6                | 0              | -3.541133               | -1.214947 | 0.410706  |
| 30               | 6                | 0              | -4.904196               | -1.198721 | 0.194662  |
| 31               | 6                | 0              | -5.661953               | 0.000045  | -0.358557 |
| 32               | 6                | 0              | -4.904220               | 1.198714  | 0.194908  |
| 33               | 6                | 0              | -3.541156               | 1.214925  | 0.410954  |
| 34               | 16               | 0              | -5.651286               | 2.679540  | 0.723717  |
| 35               | 6                | 0              | -4.127802               | 3.297576  | 1.290817  |
| 36               | 6                | 0              | -3.110434               | 2.419524  | 1.067320  |
| 37               | 6                | 0              | -3.110383               | -2.419677 | 1.066812  |
| 38               | 6                | 0              | -4.127731               | -3.297799 | 1.290123  |

|    |    |   |           |           |           |
|----|----|---|-----------|-----------|-----------|
| 39 | 16 | 0 | -5.651229 | -2.679676 | 0.723157  |
| 40 | 6  | 0 | -5.598705 | 0.000204  | -1.912747 |
| 41 | 6  | 0 | -7.139039 | -0.000015 | 0.081333  |
| 42 | 1  | 0 | -2.260786 | -2.682274 | -1.427532 |
| 43 | 1  | 0 | -0.372685 | -4.469740 | -1.666264 |
| 44 | 1  | 0 | -0.372728 | 4.470105  | -1.665599 |
| 45 | 1  | 0 | -2.260815 | 2.682583  | -1.427127 |
| 46 | 1  | 0 | 5.280020  | -0.000233 | 2.544434  |
| 47 | 1  | 0 | 6.126569  | 0.000189  | -1.648128 |
| 48 | 1  | 0 | 7.887706  | -0.000094 | -0.206634 |
| 49 | 1  | 0 | 8.903530  | 1.277131  | 1.660305  |
| 50 | 1  | 0 | 7.537074  | 2.173572  | 0.965547  |
| 51 | 1  | 0 | 7.350075  | 1.326954  | 2.508466  |
| 52 | 1  | 0 | 8.903504  | -1.277261 | 1.660331  |
| 53 | 1  | 0 | 7.537001  | -2.173696 | 0.965659  |
| 54 | 1  | 0 | 7.350080  | -1.326993 | 2.508541  |
| 55 | 1  | 0 | 1.561980  | 0.000439  | 2.009857  |
| 56 | 1  | 0 | 1.955350  | -1.276390 | 4.085632  |
| 57 | 1  | 0 | 2.565555  | -2.173350 | 2.679580  |
| 58 | 1  | 0 | 3.694254  | -1.337847 | 3.757447  |
| 59 | 1  | 0 | 1.956205  | 1.274141  | 4.087167  |
| 60 | 1  | 0 | 2.567578  | 2.172426  | 2.682472  |
| 61 | 1  | 0 | 3.695218  | 1.334450  | 3.759528  |
| 62 | 1  | 0 | 2.497693  | 0.000336  | -2.618792 |
| 63 | 1  | 0 | 3.687319  | 1.268861  | -4.372212 |
| 64 | 1  | 0 | 3.698274  | 2.174195  | -2.846023 |
| 65 | 1  | 0 | 5.155731  | 1.324035  | -3.384846 |
| 66 | 1  | 0 | 3.687310  | -1.267707 | -4.372550 |
| 67 | 1  | 0 | 3.698313  | -2.173449 | -2.846604 |
| 68 | 1  | 0 | 5.155741  | -1.323117 | -3.385232 |
| 69 | 1  | 0 | -4.082274 | 4.266907  | 1.768681  |
| 70 | 1  | 0 | -2.088904 | 2.605180  | 1.372604  |
| 71 | 1  | 0 | -2.088845 | -2.605379 | 1.372044  |
| 72 | 1  | 0 | -4.082178 | -4.267237 | 1.767768  |
| 73 | 1  | 0 | -6.098393 | -0.889143 | -2.312989 |
| 74 | 1  | 0 | -4.562061 | 0.000254  | -2.261149 |
| 75 | 1  | 0 | -6.098417 | 0.889621  | -2.312807 |
| 76 | 1  | 0 | -7.656203 | -0.881761 | -0.312920 |
| 77 | 1  | 0 | -7.235547 | -0.000095 | 1.170842  |
| 78 | 1  | 0 | -7.656239 | 0.881766  | -0.312794 |

**Table S21** Coordinates for optimized structure of the twisted conformer of **DTCB-CMe** in the ground state (S0).

# opt b3lyp/6-31g(d)

| Center<br>Number | Atomic<br>Number | Atomic<br>Type | Coordinates (Angstroms) |           |           |
|------------------|------------------|----------------|-------------------------|-----------|-----------|
|                  |                  |                | X                       | Y         | Z         |
| 1                | 6                | 0              | -0.708838               | 0.929444  | -0.850726 |
| 2                | 6                | 0              | 0.696145                | 0.902911  | -0.866721 |
| 3                | 6                | 0              | 1.454016                | 0.004916  | 0.005735  |
| 4                | 6                | 0              | 0.691332                | -0.872101 | 0.895230  |
| 5                | 6                | 0              | -0.713867               | -0.858593 | 0.911592  |
| 6                | 5                | 0              | -1.583837               | 0.047956  | 0.040662  |
| 7                | 6                | 0              | 1.231889                | -1.671698 | 1.964570  |

|    |    |   |           |           |           |
|----|----|---|-----------|-----------|-----------|
| 8  | 6  | 0 | 0.273297  | -2.283730 | 2.717532  |
| 9  | 16 | 0 | -1.326451 | -1.880705 | 2.192319  |
| 10 | 16 | 0 | -1.321336 | 1.969017  | -2.117361 |
| 11 | 6  | 0 | 0.276739  | 2.326124  | -2.679635 |
| 12 | 6  | 0 | 1.234563  | 1.686859  | -1.948645 |
| 13 | 6  | 0 | -3.166341 | 0.071054  | 0.059547  |
| 14 | 6  | 0 | -3.911280 | -0.833836 | -0.735288 |
| 15 | 6  | 0 | -5.308894 | -0.798646 | -0.706389 |
| 16 | 6  | 0 | -6.008648 | 0.111309  | 0.093056  |
| 17 | 6  | 0 | -5.264352 | 0.998398  | 0.873151  |
| 18 | 6  | 0 | -3.864198 | 0.995568  | 0.870450  |
| 19 | 6  | 0 | -7.531570 | 0.142755  | 0.118470  |
| 20 | 6  | 0 | -8.122064 | 0.506774  | -1.257027 |
| 21 | 6  | 0 | -8.126439 | -1.178301 | 0.641706  |
| 22 | 6  | 0 | -3.209079 | -1.850389 | -1.636662 |
| 23 | 6  | 0 | -3.522046 | -3.300903 | -1.223403 |
| 24 | 6  | 0 | -3.527728 | -1.616982 | -3.125754 |
| 25 | 6  | 0 | -3.114358 | 1.992009  | 1.755121  |
| 26 | 6  | 0 | -3.397970 | 3.450673  | 1.349328  |
| 27 | 6  | 0 | -3.405129 | 1.766235  | 3.251108  |
| 28 | 6  | 0 | 2.866558  | -0.014203 | -0.009784 |
| 29 | 6  | 0 | 3.635107  | -1.256792 | -0.059145 |
| 30 | 6  | 0 | 5.022713  | -1.257274 | -0.102595 |
| 31 | 6  | 0 | 5.938608  | -0.055808 | -0.041855 |
| 32 | 6  | 0 | 5.057019  | 1.170077  | 0.036349  |
| 33 | 6  | 0 | 3.669292  | 1.207179  | 0.022439  |
| 34 | 16 | 0 | 5.737604  | 2.756825  | 0.272529  |
| 35 | 6  | 0 | 4.153662  | 3.470768  | 0.386071  |
| 36 | 6  | 0 | 3.171322  | 2.544351  | 0.256581  |
| 37 | 6  | 0 | 3.096208  | -2.579798 | -0.282905 |
| 38 | 6  | 0 | 4.050111  | -3.532370 | -0.433526 |
| 39 | 16 | 0 | 5.654873  | -2.861659 | -0.353651 |
| 40 | 6  | 0 | 6.854242  | -0.146646 | 1.213153  |
| 41 | 6  | 0 | 6.832334  | 0.010462  | -1.313980 |
| 42 | 1  | 0 | 2.289144  | -1.774136 | 2.173327  |
| 43 | 1  | 0 | 0.426853  | -2.938027 | 3.566143  |
| 44 | 1  | 0 | 0.429292  | 2.975870  | -3.531915 |
| 45 | 1  | 0 | 2.289252  | 1.759052  | -2.181686 |
| 46 | 1  | 0 | -5.867298 | -1.498666 | -1.324376 |
| 47 | 1  | 0 | -5.795575 | 1.711335  | 1.501377  |
| 48 | 1  | 0 | -7.825363 | 0.935064  | 0.820956  |
| 49 | 1  | 0 | -9.215028 | 0.582870  | -1.202791 |
| 50 | 1  | 0 | -7.729670 | 1.465097  | -1.614464 |
| 51 | 1  | 0 | -7.878230 | -0.253823 | -2.008318 |
| 52 | 1  | 0 | -9.219377 | -1.112539 | 0.708218  |
| 53 | 1  | 0 | -7.737021 | -1.420455 | 1.636607  |
| 54 | 1  | 0 | -7.883429 | -2.015270 | -0.023722 |
| 55 | 1  | 0 | -2.126756 | -1.710014 | -1.515676 |
| 56 | 1  | 0 | -2.967134 | -4.009840 | -1.850346 |
| 57 | 1  | 0 | -3.247178 | -3.481326 | -0.178515 |
| 58 | 1  | 0 | -4.589694 | -3.526163 | -1.332582 |
| 59 | 1  | 0 | -2.968395 | -2.319917 | -3.755429 |
| 60 | 1  | 0 | -3.261754 | -0.599221 | -3.430984 |
| 61 | 1  | 0 | -4.594748 | -1.761200 | -3.333688 |
| 62 | 1  | 0 | -2.039293 | 1.822561  | 1.609060  |
| 63 | 1  | 0 | -2.809969 | 4.144004  | 1.963435  |
| 64 | 1  | 0 | -3.142427 | 3.624451  | 0.298418  |

|    |   |   |           |           |           |
|----|---|---|-----------|-----------|-----------|
| 65 | 1 | 0 | -4.456410 | 3.704221  | 1.483186  |
| 66 | 1 | 0 | -2.813282 | 2.453889  | 3.867811  |
| 67 | 1 | 0 | -3.159070 | 0.741668  | 3.550249  |
| 68 | 1 | 0 | -4.463003 | 1.938379  | 3.483076  |
| 69 | 1 | 0 | 4.052497  | 4.533916  | 0.557725  |
| 70 | 1 | 0 | 2.119725  | 2.784757  | 0.331837  |
| 71 | 1 | 0 | 2.037104  | -2.791555 | -0.335727 |
| 72 | 1 | 0 | 3.916566  | -4.592227 | -0.603378 |
| 73 | 1 | 0 | 7.466030  | -1.053925 | 1.171567  |
| 74 | 1 | 0 | 6.256613  | -0.173791 | 2.128892  |
| 75 | 1 | 0 | 7.527960  | 0.715076  | 1.264231  |
| 76 | 1 | 0 | 7.481300  | -0.869231 | -1.377691 |
| 77 | 1 | 0 | 6.218455  | 0.054182  | -2.218255 |
| 78 | 1 | 0 | 7.469316  | 0.900709  | -1.284176 |

**Table S22** Coordinates for optimized structure of the *anti*-folded conformer of **DTCB-SiMe** in the ground state (S0).

# opt b3lyp/6-31g(d)

| Center<br>Number | Atomic<br>Number | Atomic<br>Type | Coordinates (Angstroms) |           |           |
|------------------|------------------|----------------|-------------------------|-----------|-----------|
|                  |                  |                | X                       | Y         | Z         |
| 1                | 6                | 0              | 0.793052                | -1.259510 | -0.404053 |
| 2                | 6                | 0              | -0.595277               | -1.248610 | -0.570355 |
| 3                | 6                | 0              | -1.363268               | -0.000010 | -0.324556 |
| 4                | 6                | 0              | -0.595322               | 1.248582  | -0.570532 |
| 5                | 6                | 0              | 0.793003                | 1.259526  | -0.404233 |
| 6                | 5                | 0              | 1.651147                | 0.000034  | -0.197663 |
| 7                | 6                | 0              | -1.104212               | 2.513030  | -1.007329 |
| 8                | 6                | 0              | -0.129092               | 3.467043  | -1.124363 |
| 9                | 16               | 0              | 1.431488                | 2.857114  | -0.707295 |
| 10               | 16               | 0              | 1.431554                | -2.857131 | -0.706879 |
| 11               | 6                | 0              | -0.129003               | -3.467138 | -1.123875 |
| 12               | 6                | 0              | -1.104141               | -2.513122 | -1.006982 |
| 13               | 6                | 0              | 3.208883                | 0.000127  | 0.071207  |
| 14               | 6                | 0              | 4.151602                | -0.000139 | -0.985224 |
| 15               | 6                | 0              | 5.519397                | -0.000088 | -0.691762 |
| 16               | 6                | 0              | 5.995821                | 0.000268  | 0.623230  |
| 17               | 6                | 0              | 5.055962                | 0.000553  | 1.656066  |
| 18               | 6                | 0              | 3.679441                | 0.000473  | 1.404180  |
| 19               | 6                | 0              | 7.488152                | 0.000167  | 0.929753  |
| 20               | 6                | 0              | 8.183148                | -1.269996 | 0.403771  |
| 21               | 6                | 0              | 8.184041                | 1.268858  | 0.401456  |
| 22               | 6                | 0              | 3.705282                | -0.000422 | -2.448536 |
| 23               | 6                | 0              | 4.166478                | 1.267230  | -3.193154 |
| 24               | 6                | 0              | 4.166802                | -1.268121 | -3.192851 |
| 25               | 6                | 0              | 2.701291                | 0.000716  | 2.579132  |
| 26               | 6                | 0              | 2.833043                | -1.270312 | 3.439075  |
| 27               | 6                | 0              | 2.833142                | 1.272000  | 3.438679  |
| 28               | 6                | 0              | -2.642793               | -0.000006 | 0.180300  |
| 29               | 6                | 0              | -3.409333               | 1.243016  | 0.498043  |
| 30               | 6                | 0              | -4.727370               | 1.399929  | 0.094038  |
| 31               | 14               | 0              | -5.685794               | -0.000163 | -0.709990 |
| 32               | 6                | 0              | -4.727292               | -1.400068 | 0.094273  |
| 33               | 6                | 0              | -3.409264               | -1.243014 | 0.498255  |

|    |    |   |           |           |           |
|----|----|---|-----------|-----------|-----------|
| 34 | 16 | 0 | -5.366447 | -2.907823 | 0.684133  |
| 35 | 6  | 0 | -3.884471 | -3.299277 | 1.496118  |
| 36 | 6  | 0 | -2.941570 | -2.329923 | 1.311952  |
| 37 | 6  | 0 | -2.941692 | 2.330094  | 1.311543  |
| 38 | 6  | 0 | -3.884639 | 3.299438  | 1.495530  |
| 39 | 16 | 0 | -5.366597 | 2.907760  | 0.683618  |
| 40 | 6  | 0 | -7.498922 | -0.000160 | -0.196085 |
| 41 | 6  | 0 | -5.527492 | -0.000323 | -2.591228 |
| 42 | 1  | 0 | -2.140623 | 2.701377  | -1.252982 |
| 43 | 1  | 0 | -0.251700 | 4.491761  | -1.450648 |
| 44 | 1  | 0 | -0.251595 | -4.491907 | -1.450007 |
| 45 | 1  | 0 | -2.140546 | -2.701516 | -1.252625 |
| 46 | 1  | 0 | 6.233516  | -0.000339 | -1.512340 |
| 47 | 1  | 0 | 5.411379  | 0.000847  | 2.685009  |
| 48 | 1  | 0 | 7.591825  | 0.001144  | 2.023707  |
| 49 | 1  | 0 | 9.242744  | -1.277965 | 0.687091  |
| 50 | 1  | 0 | 7.714167  | -2.173712 | 0.808067  |
| 51 | 1  | 0 | 8.130737  | -1.328356 | -0.689933 |
| 52 | 1  | 0 | 9.243590  | 1.276647  | 0.684946  |
| 53 | 1  | 0 | 7.715606  | 2.173656  | 0.803966  |
| 54 | 1  | 0 | 8.131908  | 1.325209  | -0.692365 |
| 55 | 1  | 0 | 2.607045  | -0.000573 | -2.463479 |
| 56 | 1  | 0 | 3.787317  | 1.268216  | -4.222402 |
| 57 | 1  | 0 | 3.805079  | 2.173341  | -2.696064 |
| 58 | 1  | 0 | 5.260434  | 1.324445  | -3.242195 |
| 59 | 1  | 0 | 3.787621  | -1.269437 | -4.222091 |
| 60 | 1  | 0 | 3.805639  | -2.174210 | -2.695548 |
| 61 | 1  | 0 | 5.260772  | -1.325083 | -3.241920 |
| 62 | 1  | 0 | 1.682813  | 0.000693  | 2.165693  |
| 63 | 1  | 0 | 2.085698  | -1.273981 | 4.242030  |
| 64 | 1  | 0 | 2.689651  | -2.172137 | 2.833929  |
| 65 | 1  | 0 | 3.823018  | -1.335151 | 3.905855  |
| 66 | 1  | 0 | 2.085804  | 1.275969  | 4.241638  |
| 67 | 1  | 0 | 2.689806  | 2.173645  | 2.833252  |
| 68 | 1  | 0 | 3.823124  | 1.336918  | 3.905432  |
| 69 | 1  | 0 | -3.795824 | -4.216014 | 2.064152  |
| 70 | 1  | 0 | -1.948913 | -2.371717 | 1.743554  |
| 71 | 1  | 0 | -1.949033 | 2.372020  | 1.743126  |
| 72 | 1  | 0 | -3.796033 | 4.216288  | 2.063387  |
| 73 | 1  | 0 | -8.018415 | -0.883475 | -0.586742 |
| 74 | 1  | 0 | -8.018477 | 0.883000  | -0.587009 |
| 75 | 1  | 0 | -7.605307 | 0.000000  | 0.893590  |
| 76 | 1  | 0 | -6.005776 | 0.886046  | -3.025033 |
| 77 | 1  | 0 | -4.476110 | -0.000392 | -2.898109 |
| 78 | 1  | 0 | -6.005849 | -0.886725 | -3.024884 |

**Table S23** Coordinates for optimized structure of the twisted conformer of **DTCB-SiMe** in the ground state (S0).

# opt b3lyp/6-31g(d)

| Center Number | Atomic Number | Atomic Type | Coordinates (Angstroms) |          |           |
|---------------|---------------|-------------|-------------------------|----------|-----------|
|               |               |             | X                       | Y        | Z         |
| 1             | 6             | 0           | -0.845609               | 0.884347 | -0.901021 |
| 2             | 6             | 0           | 0.559197                | 0.860008 | -0.910599 |

|    |    |   |           |           |           |
|----|----|---|-----------|-----------|-----------|
| 3  | 6  | 0 | 1.316620  | 0.007796  | 0.006486  |
| 4  | 6  | 0 | 0.553397  | -0.822499 | 0.938783  |
| 5  | 6  | 0 | -0.851443 | -0.805362 | 0.957916  |
| 6  | 5  | 0 | -1.722458 | 0.052486  | 0.037506  |
| 7  | 6  | 0 | 1.097659  | -1.569365 | 2.043601  |
| 8  | 6  | 0 | 0.140464  | -2.137719 | 2.831120  |
| 9  | 16 | 0 | -1.460845 | -1.755893 | 2.292337  |
| 10 | 16 | 0 | -1.453823 | 1.853003  | -2.222883 |
| 11 | 6  | 0 | 0.146724  | 2.187286  | -2.794579 |
| 12 | 6  | 0 | 1.102606  | 1.590698  | -2.026585 |
| 13 | 6  | 0 | -3.304206 | 0.075942  | 0.053926  |
| 14 | 6  | 0 | -4.047837 | -0.876984 | -0.683893 |
| 15 | 6  | 0 | -5.445411 | -0.841178 | -0.657457 |
| 16 | 6  | 0 | -6.146059 | 0.116243  | 0.083729  |
| 17 | 6  | 0 | -5.402801 | 1.050587  | 0.807643  |
| 18 | 6  | 0 | -4.002690 | 1.048379  | 0.806018  |
| 19 | 6  | 0 | -7.669012 | 0.146791  | 0.107829  |
| 20 | 6  | 0 | -8.261673 | 0.413474  | -1.288795 |
| 21 | 6  | 0 | -8.260038 | -1.136434 | 0.721918  |
| 22 | 6  | 0 | -3.344153 | -1.945263 | -1.521996 |
| 23 | 6  | 0 | -3.658305 | -3.368947 | -1.024901 |
| 24 | 6  | 0 | -3.659584 | -1.799730 | -3.022895 |
| 25 | 6  | 0 | -3.253602 | 2.096468  | 1.629493  |
| 26 | 6  | 0 | -3.538956 | 3.528322  | 1.138449  |
| 27 | 6  | 0 | -3.543331 | 1.959120  | 3.136362  |
| 28 | 6  | 0 | 2.735428  | -0.012341 | -0.007358 |
| 29 | 6  | 0 | 3.447775  | -1.298169 | -0.049362 |
| 30 | 6  | 0 | 4.838774  | -1.448620 | -0.027619 |
| 31 | 14 | 0 | 6.081192  | -0.059969 | -0.038065 |
| 32 | 6  | 0 | 4.878781  | 1.363475  | -0.026849 |
| 33 | 6  | 0 | 3.484694  | 1.252739  | 0.020689  |
| 34 | 16 | 0 | 5.380917  | 3.010606  | 0.207150  |
| 35 | 6  | 0 | 3.744743  | 3.558879  | 0.396786  |
| 36 | 6  | 0 | 2.862680  | 2.531131  | 0.296391  |
| 37 | 6  | 0 | 2.784553  | -2.558144 | -0.313471 |
| 38 | 6  | 0 | 3.634945  | -3.610568 | -0.430231 |
| 39 | 16 | 0 | 5.289319  | -3.109259 | -0.270911 |
| 40 | 6  | 0 | 7.183039  | -0.038418 | 1.495643  |
| 41 | 6  | 0 | 7.154832  | -0.112395 | -1.590916 |
| 42 | 1  | 0 | 2.156327  | -1.668018 | 2.247262  |
| 43 | 1  | 0 | 0.294555  | -2.749218 | 3.710923  |
| 44 | 1  | 0 | 0.300791  | 2.794181  | -3.677568 |
| 45 | 1  | 0 | 2.159360  | 1.658066  | -2.251827 |
| 46 | 1  | 0 | -6.003221 | -1.578571 | -1.230874 |
| 47 | 1  | 0 | -5.934814 | 1.800495  | 1.390449  |
| 48 | 1  | 0 | -7.963875 | 0.985080  | 0.754229  |
| 49 | 1  | 0 | -9.354658 | 0.491090  | -1.238268 |
| 50 | 1  | 0 | -7.871741 | 1.345499  | -1.712346 |
| 51 | 1  | 0 | -8.017579 | -0.396876 | -1.986017 |
| 52 | 1  | 0 | -9.353115 | -1.069289 | 0.784165  |
| 53 | 1  | 0 | -7.869731 | -1.307782 | 1.731080  |
| 54 | 1  | 0 | -8.014624 | -2.016860 | 0.116107  |
| 55 | 1  | 0 | -2.261872 | -1.798204 | -1.407109 |
| 56 | 1  | 0 | -3.102154 | -4.113475 | -1.607889 |
| 57 | 1  | 0 | -3.386023 | -3.487853 | 0.029420  |
| 58 | 1  | 0 | -4.725691 | -3.600201 | -1.123247 |
| 59 | 1  | 0 | -3.098988 | -2.538320 | -3.609064 |



|    |   |   |           |           |           |
|----|---|---|-----------|-----------|-----------|
| 60 | 1 | 0 | -3.393388 | -0.801577 | -3.387045 |
| 61 | 1 | 0 | -4.726183 | -1.956211 | -3.223791 |
| 62 | 1 | 0 | -2.178233 | 1.919867  | 1.493148  |
| 63 | 1 | 0 | -2.951574 | 4.257282  | 1.710379  |
| 64 | 1 | 0 | -3.284134 | 3.640241  | 0.079005  |
| 65 | 1 | 0 | -4.597591 | 3.788127  | 1.257697  |
| 66 | 1 | 0 | -2.951524 | 2.682179  | 3.711107  |
| 67 | 1 | 0 | -3.296939 | 0.954060  | 3.495440  |
| 68 | 1 | 0 | -4.601156 | 2.144323  | 3.358051  |
| 69 | 1 | 0 | 3.531959  | 4.602843  | 0.584985  |
| 70 | 1 | 0 | 1.797160  | 2.661832  | 0.425841  |
| 71 | 1 | 0 | 1.713506  | -2.658335 | -0.423095 |
| 72 | 1 | 0 | 3.389040  | -4.647938 | -0.614485 |
| 73 | 1 | 0 | 7.844688  | 0.836180  | 1.494373  |
| 74 | 1 | 0 | 7.816577  | -0.932893 | 1.533984  |
| 75 | 1 | 0 | 6.584444  | -0.007949 | 2.411959  |
| 76 | 1 | 0 | 7.791275  | -1.005445 | -1.601122 |
| 77 | 1 | 0 | 6.539620  | -0.125520 | -2.496574 |
| 78 | 1 | 0 | 7.812783  | 0.763712  | -1.640528 |

**Table S24** Coordinates for optimized structure of the *anti*-folded conformer of **DTCB-SiPh** in the ground state (S0).

# opt b3lyp/6-31g(d)

| Center<br>Number | Atomic<br>Number | Atomic<br>Type | Coordinates (Angstroms) |           |           |
|------------------|------------------|----------------|-------------------------|-----------|-----------|
|                  |                  |                | X                       | Y         | Z         |
| 1                | 6                | 0              | -1.965958               | 0.311469  | -1.259930 |
| 2                | 6                | 0              | -0.568463               | 0.352400  | -1.247982 |
| 3                | 6                | 0              | 0.172638                | 0.033911  | -0.000047 |
| 4                | 6                | 0              | -0.568435               | 0.352544  | 1.247869  |
| 5                | 6                | 0              | -1.965929               | 0.311622  | 1.259866  |
| 6                | 5                | 0              | -2.839250               | 0.182885  | -0.000015 |
| 7                | 6                | 0              | -0.020140               | 0.746348  | 2.509516  |
| 8                | 6                | 0              | -0.979499               | 0.953226  | 3.464248  |
| 9                | 16               | 0              | -2.572256               | 0.675493  | 2.857400  |
| 10               | 16               | 0              | -2.572336               | 0.675116  | -2.857493 |
| 11               | 6                | 0              | -0.979603               | 0.952769  | -3.464433 |
| 12               | 6                | 0              | -0.020211               | 0.746029  | -2.509702 |
| 13               | 6                | 0              | -4.415101               | 0.056502  | 0.000014  |
| 14               | 6                | 0              | -5.005047               | -1.230555 | 0.000139  |
| 15               | 6                | 0              | -6.396529               | -1.360241 | 0.000175  |
| 16               | 6                | 0              | -7.240180               | -0.244106 | 0.000086  |
| 17               | 6                | 0              | -6.647332               | 1.019762  | -0.000038 |
| 18               | 6                | 0              | -5.257190               | 1.191939  | -0.000073 |
| 19               | 6                | 0              | -8.756399               | -0.392137 | 0.000112  |
| 20               | 6                | 0              | -9.264955               | -1.101326 | -1.269310 |
| 21               | 6                | 0              | -9.264936               | -1.101228 | 1.269595  |
| 22               | 6                | 0              | -4.133836               | -2.487309 | 0.000228  |
| 23               | 6                | 0              | -4.340167               | -3.331868 | 1.271566  |
| 24               | 6                | 0              | -4.340094               | -3.331978 | -1.271049 |
| 25               | 6                | 0              | -4.683461               | 2.609707  | -0.000210 |
| 26               | 6                | 0              | -5.077761               | 3.391855  | -1.267829 |
| 27               | 6                | 0              | -5.077641               | 3.392051  | 1.267326  |
| 28               | 6                | 0              | 1.396996                | -0.592165 | -0.000016 |

|    |    |   |            |           |           |
|----|----|---|------------|-----------|-----------|
| 29 | 6  | 0 | 2.128132   | -0.982917 | 1.243257  |
| 30 | 6  | 0 | 3.480566   | -0.712901 | 1.400792  |
| 31 | 14 | 0 | 4.498743   | 0.007522  | -0.000025 |
| 32 | 6  | 0 | 3.480572   | -0.712951 | -1.400817 |
| 33 | 6  | 0 | 2.128152   | -0.983010 | -1.243255 |
| 34 | 16 | 0 | 4.059749   | -1.362129 | -2.908181 |
| 35 | 6  | 0 | 2.503220   | -2.016265 | -3.301934 |
| 36 | 6  | 0 | 1.582200   | -1.742615 | -2.331935 |
| 37 | 6  | 0 | 1.582154   | -1.742382 | 2.332021  |
| 38 | 6  | 0 | 2.503167   | -2.015969 | 3.302045  |
| 39 | 16 | 0 | 4.059726   | -1.361934 | 2.908200  |
| 40 | 6  | 0 | 4.469677   | 1.890684  | -0.000067 |
| 41 | 6  | 0 | 6.266312   | -0.637479 | 0.000018  |
| 42 | 6  | 0 | 6.523196   | -2.022761 | -0.000194 |
| 43 | 6  | 0 | 7.828210   | -2.513558 | -0.000132 |
| 44 | 6  | 0 | 8.907802   | -1.626828 | 0.000148  |
| 45 | 6  | 0 | 8.676098   | -0.251134 | 0.000362  |
| 46 | 6  | 0 | 7.367682   | 0.236937  | 0.000295  |
| 47 | 6  | 0 | 4.470129   | 2.615944  | -1.205671 |
| 48 | 6  | 0 | 4.478829   | 4.011572  | -1.208117 |
| 49 | 6  | 0 | 4.484281   | 4.711583  | -0.000155 |
| 50 | 6  | 0 | 4.479459   | 4.011644  | 1.207854  |
| 51 | 6  | 0 | 4.470754   | 2.616016  | 1.205493  |
| 52 | 1  | 0 | 1.034469   | 0.901961  | 2.692740  |
| 53 | 1  | 0 | -0.827225  | 1.271536  | 4.487494  |
| 54 | 1  | 0 | -0.827363  | 1.270939  | -4.487727 |
| 55 | 1  | 0 | 1.034390   | 0.901626  | -2.692984 |
| 56 | 1  | 0 | -6.834914  | -2.355932 | 0.000271  |
| 57 | 1  | 0 | -7.292325  | 1.896487  | -0.000110 |
| 58 | 1  | 0 | -9.178768  | 0.622258  | 0.000077  |
| 59 | 1  | 0 | -10.360947 | -1.144046 | -1.277165 |
| 60 | 1  | 0 | -8.936600  | -0.577194 | -2.173502 |
| 61 | 1  | 0 | -8.891540  | -2.130735 | -1.326853 |
| 62 | 1  | 0 | -10.360928 | -1.143934 | 1.277473  |
| 63 | 1  | 0 | -8.936558  | -0.577034 | 2.173743  |
| 64 | 1  | 0 | -8.891536  | -2.130639 | 1.327208  |
| 65 | 1  | 0 | -3.083037  | -2.164810 | 0.000245  |
| 66 | 1  | 0 | -3.665710  | -4.196965 | 1.275862  |
| 67 | 1  | 0 | -4.144718  | -2.740970 | 2.173055  |
| 68 | 1  | 0 | -5.367053  | -3.710607 | 1.336670  |
| 69 | 1  | 0 | -3.665654  | -4.197089 | -1.275222 |
| 70 | 1  | 0 | -4.144569  | -2.741163 | -2.172577 |
| 71 | 1  | 0 | -5.366984  | -3.710697 | -1.336190 |
| 72 | 1  | 0 | -3.588206  | 2.527347  | -0.000255 |
| 73 | 1  | 0 | -4.608277  | 4.383156  | -1.269642 |
| 74 | 1  | 0 | -4.762865  | 2.864042  | -2.173892 |
| 75 | 1  | 0 | -6.163068  | 3.538117  | -1.323935 |
| 76 | 1  | 0 | -4.608154  | 4.383351  | 1.268945  |
| 77 | 1  | 0 | -4.762663  | 2.864376  | 2.173441  |
| 78 | 1  | 0 | -6.162942  | 3.538325  | 1.323508  |
| 79 | 1  | 0 | 2.358097   | -2.571321 | -4.219529 |
| 80 | 1  | 0 | 0.551764   | -2.073936 | -2.374458 |
| 81 | 1  | 0 | 0.551706   | -2.073660 | 2.374584  |
| 82 | 1  | 0 | 2.358033   | -2.570932 | 4.219695  |
| 83 | 1  | 0 | 5.694571   | -2.727081 | -0.000412 |
| 84 | 1  | 0 | 8.003840   | -3.586211 | -0.000301 |
| 85 | 1  | 0 | 9.925676   | -2.008399 | 0.000197  |

|    |   |   |          |          |           |
|----|---|---|----------|----------|-----------|
| 86 | 1 | 0 | 9.512667 | 0.442915 | 0.000578  |
| 87 | 1 | 0 | 7.202709 | 1.311193 | 0.000455  |
| 88 | 1 | 0 | 4.455178 | 2.085610 | -2.155511 |
| 89 | 1 | 0 | 4.476243 | 4.552113 | -2.151209 |
| 90 | 1 | 0 | 4.487168 | 5.798541 | -0.000188 |
| 91 | 1 | 0 | 4.477366 | 4.552240 | 2.150914  |
| 92 | 1 | 0 | 4.456287 | 2.085745 | 2.155377  |

**Table S25** Coordinates for optimized structure of the twisted conformer of **DTCB-SiPh** in the ground state (S<sub>0</sub>).

# opt b3lyp/6-31g(d)

| Center<br>Number | Atomic<br>Number | Atomic<br>Type | Coordinates (Angstroms) |           |           |
|------------------|------------------|----------------|-------------------------|-----------|-----------|
|                  |                  |                | X                       | Y         | Z         |
| 1                | 6                | 0              | -2.178246               | 1.033807  | 0.721552  |
| 2                | 6                | 0              | -0.773347               | 1.035995  | 0.703260  |
| 3                | 6                | 0              | -0.014619               | -0.017863 | 0.028716  |
| 4                | 6                | 0              | -0.776873               | -1.080119 | -0.628360 |
| 5                | 6                | 0              | -2.181748               | -1.092509 | -0.616506 |
| 6                | 5                | 0              | -3.054168               | -0.033483 | 0.061398  |
| 7                | 6                | 0              | -0.232560               | -2.300357 | -1.166039 |
| 8                | 6                | 0              | -1.189379               | -3.173091 | -1.592907 |
| 9                | 16               | 0              | -2.790759               | -2.571168 | -1.321545 |
| 10               | 16               | 0              | -2.787332               | 2.505627  | 1.440723  |
| 11               | 6                | 0              | -1.186848               | 3.123887  | 1.678372  |
| 12               | 6                | 0              | -0.230372               | 2.261457  | 1.230307  |
| 13               | 6                | 0              | -4.635965               | -0.040920 | 0.077465  |
| 14               | 6                | 0              | -5.370889               | 0.519200  | -0.995623 |
| 15               | 6                | 0              | -6.768735               | 0.504808  | -0.964213 |
| 16               | 6                | 0              | -7.477975               | -0.053823 | 0.104359  |
| 17               | 6                | 0              | -6.743165               | -0.604256 | 1.156332  |
| 18               | 6                | 0              | -5.343081               | -0.606905 | 1.163147  |
| 19               | 6                | 0              | -9.001185               | -0.066160 | 0.129749  |
| 20               | 6                | 0              | -9.587668               | 1.358177  | 0.147149  |
| 21               | 6                | 0              | -9.589404               | -0.890709 | -1.030879 |
| 22               | 6                | 0              | -4.657345               | 1.153387  | -2.190363 |
| 23               | 6                | 0              | -4.973986               | 0.421407  | -3.508112 |
| 24               | 6                | 0              | -4.958194               | 2.659866  | -2.306459 |
| 25               | 6                | 0              | -4.603230               | -1.234559 | 2.344796  |
| 26               | 6                | 0              | -4.902868               | -0.504779 | 3.667770  |
| 27               | 6                | 0              | -4.889842               | -2.743392 | 2.466562  |
| 28               | 6                | 0              | 1.404350                | -0.009745 | 0.012164  |
| 29               | 6                | 0              | 2.122012                | -0.196792 | -1.256751 |
| 30               | 6                | 0              | 3.514363                | -0.252583 | -1.394393 |
| 31               | 14               | 0              | 4.752948                | 0.014920  | -0.027105 |
| 32               | 6                | 0              | 3.543145                | 0.260944  | 1.369576  |
| 33               | 6                | 0              | 2.148934                | 0.185776  | 1.264169  |
| 34               | 16               | 0              | 4.039731                | 0.317027  | 3.033859  |
| 35               | 6                | 0              | 2.403030                | 0.218366  | 3.599887  |
| 36               | 6                | 0              | 1.523203                | 0.133094  | 2.568291  |
| 37               | 6                | 0              | 1.465599                | -0.155077 | -2.546125 |
| 38               | 6                | 0              | 2.322382                | -0.229966 | -3.597715 |
| 39               | 16               | 0              | 3.972974                | -0.304791 | -3.069675 |
| 40               | 6                | 0              | 5.851645                | -1.493716 | 0.237302  |

|    |   |   |            |           |           |
|----|---|---|------------|-----------|-----------|
| 41 | 6 | 0 | 5.817917   | 1.542834  | -0.317783 |
| 42 | 6 | 0 | 5.407704   | 2.806307  | 0.145603  |
| 43 | 6 | 0 | 6.163627   | 3.950679  | -0.112049 |
| 44 | 6 | 0 | 7.348417   | 3.854633  | -0.843949 |
| 45 | 6 | 0 | 7.774527   | 2.610989  | -1.314039 |
| 46 | 6 | 0 | 7.017466   | 1.468551  | -1.051004 |
| 47 | 6 | 0 | 7.070165   | -1.396916 | 0.935767  |
| 48 | 6 | 0 | 7.853562   | -2.525663 | 1.180228  |
| 49 | 6 | 0 | 7.435247   | -3.777784 | 0.725948  |
| 50 | 6 | 0 | 6.231857   | -3.896075 | 0.028419  |
| 51 | 6 | 0 | 5.449740   | -2.765396 | -0.210714 |
| 52 | 1 | 0 | 0.825948   | -2.520386 | -1.220853 |
| 53 | 1 | 0 | -1.035270  | -4.147134 | -2.039227 |
| 54 | 1 | 0 | -1.033292  | 4.099087  | 2.122351  |
| 55 | 1 | 0 | 0.826692   | 2.492519  | 1.262767  |
| 56 | 1 | 0 | -7.319767  | 0.941745  | -1.794346 |
| 57 | 1 | 0 | -7.281938  | -1.044218 | 1.993723  |
| 58 | 1 | 0 | -9.303426  | -0.556188 | 1.065709  |
| 59 | 1 | 0 | -10.681274 | 1.326766  | 0.226155  |
| 60 | 1 | 0 | -9.199917  | 1.935025  | 0.993911  |
| 61 | 1 | 0 | -9.335885  | 1.903337  | -0.770329 |
| 62 | 1 | 0 | -10.683063 | -0.935877 | -0.959709 |
| 63 | 1 | 0 | -9.203425  | -1.915927 | -1.022837 |
| 64 | 1 | 0 | -9.337182  | -0.447547 | -2.001632 |
| 65 | 1 | 0 | -3.576420  | 1.055403  | -2.022321 |
| 66 | 1 | 0 | -4.409757  | 0.861321  | -4.339713 |
| 67 | 1 | 0 | -4.713208  | -0.640458 | -3.442296 |
| 68 | 1 | 0 | -6.039635  | 0.489547  | -3.757440 |
| 69 | 1 | 0 | -4.392145  | 3.104548  | -3.134245 |
| 70 | 1 | 0 | -4.688170  | 3.188104  | -1.385675 |
| 71 | 1 | 0 | -6.022918  | 2.840823  | -2.496563 |
| 72 | 1 | 0 | -3.526310  | -1.127583 | 2.157427  |
| 73 | 1 | 0 | -4.320642  | -0.939895 | 4.489433  |
| 74 | 1 | 0 | -4.651798  | 0.559129  | 3.597247  |
| 75 | 1 | 0 | -5.963430  | -0.581571 | 3.935518  |
| 76 | 1 | 0 | -4.305788  | -3.183042 | 3.284469  |
| 77 | 1 | 0 | -4.631603  | -3.269825 | 1.541361  |
| 78 | 1 | 0 | -5.949590  | -2.932719 | 2.675324  |
| 79 | 1 | 0 | 2.186714   | 0.212697  | 4.660044  |
| 80 | 1 | 0 | 0.457787   | 0.022184  | 2.716058  |
| 81 | 1 | 0 | 0.395618   | -0.059452 | -2.669404 |
| 82 | 1 | 0 | 2.081458   | -0.229453 | -4.652568 |
| 83 | 1 | 0 | 4.487815   | 2.896273  | 0.718284  |
| 84 | 1 | 0 | 5.829034   | 4.915970  | 0.259179  |
| 85 | 1 | 0 | 7.938604   | 4.744903  | -1.045487 |
| 86 | 1 | 0 | 8.697624   | 2.529986  | -1.882278 |
| 87 | 1 | 0 | 7.371937   | 0.507048  | -1.415169 |
| 88 | 1 | 0 | 7.418605   | -0.428387 | 1.286884  |
| 89 | 1 | 0 | 8.790996   | -2.427350 | 1.721632  |
| 90 | 1 | 0 | 8.045863   | -4.657374 | 0.913005  |
| 91 | 1 | 0 | 5.903155   | -4.868044 | -0.330437 |
| 92 | 1 | 0 | 4.515563   | -2.872623 | -0.756677 |

**Table S26** Coordinates for optimized structure of the *anti*-folded conformer of DTCB-SiNp in the ground state (S0).

# opt b3lyp/6-31g(d)

| Center<br>Number | Atomic<br>Number | Atomic<br>Type | Coordinates (Angstroms) |           |           |
|------------------|------------------|----------------|-------------------------|-----------|-----------|
|                  |                  |                | X                       | Y         | Z         |
| 1                | 6                | 0              | 2.738584                | 0.266558  | 1.312664  |
| 2                | 6                | 0              | 1.345152                | 0.176907  | 1.387122  |
| 3                | 6                | 0              | 0.542246                | 0.073795  | 0.140846  |
| 4                | 6                | 0              | 1.249086                | -0.587218 | -0.986819 |
| 5                | 6                | 0              | 2.641485                | -0.506341 | -1.083364 |
| 6                | 5                | 0              | 3.555463                | 0.032120  | 0.029959  |
| 7                | 6                | 0              | 0.669981                | -1.368527 | -2.036561 |
| 8                | 6                | 0              | 1.599771                | -1.828542 | -2.930127 |
| 9                | 16               | 0              | 3.200634                | -1.325373 | -2.521766 |
| 10               | 16               | 0              | 3.425251                | 0.432309  | 2.910478  |
| 11               | 6                | 0              | 1.873586                | 0.301559  | 3.656589  |
| 12               | 6                | 0              | 0.868168                | 0.172379  | 2.736149  |
| 13               | 6                | 0              | 5.122114                | 0.207030  | -0.089519 |
| 14               | 6                | 0              | 6.019415                | -0.845501 | 0.213158  |
| 15               | 6                | 0              | 7.397207                | -0.637012 | 0.089708  |
| 16               | 6                | 0              | 7.927487                | 0.588185  | -0.327276 |
| 17               | 6                | 0              | 7.032041                | 1.618200  | -0.622882 |
| 18               | 6                | 0              | 5.647313                | 1.449698  | -0.511738 |
| 19               | 6                | 0              | 9.430097                | 0.802497  | -0.458640 |
| 20               | 6                | 0              | 10.152990               | 0.653188  | 0.893403  |
| 21               | 6                | 0              | 10.052022               | -0.122540 | -1.521900 |
| 22               | 6                | 0              | 5.512751                | -2.213312 | 0.674400  |
| 23               | 6                | 0              | 5.894357                | -3.333451 | -0.312349 |
| 24               | 6                | 0              | 5.990290                | -2.555805 | 2.098730  |
| 25               | 6                | 0              | 4.719491                | 2.616519  | -0.850874 |
| 26               | 6                | 0              | 4.938052                | 3.818639  | 0.086928  |
| 27               | 6                | 0              | 4.835055                | 3.033581  | -2.329069 |
| 28               | 6                | 0              | -0.709440               | 0.628040  | 0.008421  |
| 29               | 6                | 0              | -1.488564               | 0.608758  | -1.265490 |
| 30               | 6                | 0              | -2.832349               | 0.259911  | -1.293917 |
| 31               | 14               | 0              | -3.793673               | -0.055501 | 0.294365  |
| 32               | 6                | 0              | -2.759325               | 1.067736  | 1.389680  |
| 33               | 6                | 0              | -1.426807               | 1.338669  | 1.108636  |
| 34               | 16               | 0              | -3.329518               | 2.092438  | 2.676037  |
| 35               | 6                | 0              | -1.802315               | 2.901925  | 2.799492  |
| 36               | 6                | 0              | -0.893917               | 2.403352  | 1.910193  |
| 37               | 6                | 0              | -0.993394               | 1.028913  | -2.546147 |
| 38               | 6                | 0              | -1.941478               | 0.971176  | -3.526117 |
| 39               | 16               | 0              | -3.460908               | 0.409649  | -2.910316 |
| 40               | 6                | 0              | -5.601896               | 0.489006  | 0.208366  |
| 41               | 6                | 0              | -3.646226               | -1.848895 | 0.890204  |
| 42               | 6                | 0              | -3.109666               | -2.065198 | 2.151987  |
| 43               | 6                | 0              | -2.928117               | -3.364234 | 2.682998  |
| 44               | 6                | 0              | -3.281366               | -4.464884 | 1.941378  |
| 45               | 6                | 0              | -3.837686               | -4.315033 | 0.643125  |
| 46               | 6                | 0              | -4.029437               | -2.995867 | 0.107396  |
| 47               | 6                | 0              | -6.571547               | -0.428916 | 0.591123  |
| 48               | 6                | 0              | -7.951583               | -0.118494 | 0.578990  |
| 49               | 6                | 0              | -8.370433               | 1.126803  | 0.179312  |
| 50               | 6                | 0              | -7.431621               | 2.115395  | -0.218692 |
| 51               | 6                | 0              | -6.029244               | 1.803407  | -0.204681 |

|     |   |   |           |           |           |
|-----|---|---|-----------|-----------|-----------|
| 52  | 6 | 0 | -4.210581 | -5.447132 | -0.130113 |
| 53  | 6 | 0 | -4.757274 | -5.300988 | -1.384075 |
| 54  | 6 | 0 | -4.956053 | -4.006114 | -1.916554 |
| 55  | 6 | 0 | -4.602578 | -2.890126 | -1.190424 |
| 56  | 6 | 0 | -7.860595 | 3.407243  | -0.625518 |
| 57  | 6 | 0 | -6.952571 | 4.368995  | -1.003063 |
| 58  | 6 | 0 | -5.570279 | 4.072666  | -0.986614 |
| 59  | 6 | 0 | -5.123875 | 2.828053  | -0.599428 |
| 60  | 1 | 0 | -0.382678 | -1.607455 | -2.108689 |
| 61  | 1 | 0 | 1.422189  | -2.452229 | -3.796725 |
| 62  | 1 | 0 | 1.777579  | 0.309109  | 4.734685  |
| 63  | 1 | 0 | -0.169369 | 0.047222  | 3.014488  |
| 64  | 1 | 0 | 8.076141  | -1.453679 | 0.325174  |
| 65  | 1 | 0 | 7.429598  | 2.577720  | -0.948974 |
| 66  | 1 | 0 | 9.579054  | 1.837241  | -0.797195 |
| 67  | 1 | 0 | 11.222938 | 0.870057  | 0.787242  |
| 68  | 1 | 0 | 9.737892  | 1.337358  | 1.641544  |
| 69  | 1 | 0 | 10.057492 | -0.366464 | 1.285180  |
| 70  | 1 | 0 | 11.121374 | 0.089449  | -1.642932 |
| 71  | 1 | 0 | 9.565000  | 0.009140  | -2.494307 |
| 72  | 1 | 0 | 9.951778  | -1.177266 | -1.239355 |
| 73  | 1 | 0 | 4.415669  | -2.171064 | 0.704409  |
| 74  | 1 | 0 | 5.471685  | -4.292219 | 0.011995  |
| 75  | 1 | 0 | 5.521078  | -3.119834 | -1.319170 |
| 76  | 1 | 0 | 6.982364  | -3.454588 | -0.375893 |
| 77  | 1 | 0 | 5.567667  | -3.513538 | 2.426222  |
| 78  | 1 | 0 | 5.685725  | -1.786107 | 2.815320  |
| 79  | 1 | 0 | 7.082562  | -2.642441 | 2.142554  |
| 80  | 1 | 0 | 3.685663  | 2.276667  | -0.696280 |
| 81  | 1 | 0 | 4.225298  | 4.621159  | -0.139465 |
| 82  | 1 | 0 | 4.806206  | 3.529541  | 1.135308  |
| 83  | 1 | 0 | 5.948258  | 4.230773  | -0.021486 |
| 84  | 1 | 0 | 4.123147  | 3.834884  | -2.562382 |
| 85  | 1 | 0 | 4.628712  | 2.188026  | -2.994276 |
| 86  | 1 | 0 | 5.840545  | 3.403862  | -2.561464 |
| 87  | 1 | 0 | -1.662716 | 3.702585  | 3.514097  |
| 88  | 1 | 0 | 0.118029  | 2.777604  | 1.814335  |
| 89  | 1 | 0 | 0.022551  | 1.364863  | -2.714420 |
| 90  | 1 | 0 | -1.836580 | 1.232442  | -4.571017 |
| 91  | 1 | 0 | -2.811146 | -1.215364 | 2.759612  |
| 92  | 1 | 0 | -2.503829 | -3.482712 | 3.676343  |
| 93  | 1 | 0 | -3.140953 | -5.468443 | 2.336654  |
| 94  | 1 | 0 | -6.275033 | -1.423464 | 0.910600  |
| 95  | 1 | 0 | -8.672664 | -0.871165 | 0.885882  |
| 96  | 1 | 0 | -9.428973 | 1.376958  | 0.163922  |
| 97  | 1 | 0 | -4.055896 | -6.437353 | 0.292421  |
| 98  | 1 | 0 | -5.038475 | -6.174850 | -1.965390 |
| 99  | 1 | 0 | -5.390850 | -3.890557 | -2.905621 |
| 100 | 1 | 0 | -4.770979 | -1.908649 | -1.620843 |
| 101 | 1 | 0 | -8.926889 | 3.621832  | -0.630326 |
| 102 | 1 | 0 | -7.292423 | 5.353945  | -1.311475 |
| 103 | 1 | 0 | -4.852940 | 4.833613  | -1.281778 |
| 104 | 1 | 0 | -4.058205 | 2.627535  | -0.594638 |

Table S27 Coordinates for optimized structure of the twisted conformer of **DTCB-SiNp** in the ground state (S0).

# opt b3lyp/6-31g(d)

| Center<br>Number | Atomic<br>Number | Atomic<br>Type | Coordinates (Angstroms) |           |           |
|------------------|------------------|----------------|-------------------------|-----------|-----------|
|                  |                  |                | X                       | Y         | Z         |
| 1                | 6                | 0              | -2.950595               | -0.754334 | -1.079790 |
| 2                | 6                | 0              | -1.545852               | -0.738957 | -1.106623 |
| 3                | 6                | 0              | -0.767590               | -0.013531 | -0.101956 |
| 4                | 6                | 0              | -1.510231               | 0.705584  | 0.933515  |
| 5                | 6                | 0              | -2.914978               | 0.698409  | 0.968770  |
| 6                | 5                | 0              | -3.806610               | -0.036370 | -0.034883 |
| 7                | 6                | 0              | -0.954383               | 1.638303  | 1.880320  |
| 8                | 6                | 0              | -1.900064               | 2.266900  | 2.635043  |
| 9                | 16               | 0              | -3.506943               | 1.786988  | 2.201678  |
| 10               | 16               | 0              | -3.578261               | -1.842961 | -2.294831 |
| 11               | 6                | 0              | -1.984294               | -2.291667 | -2.803077 |
| 12               | 6                | 0              | -1.016375               | -1.653740 | -2.085120 |
| 13               | 6                | 0              | -5.388132               | -0.049224 | 0.002594  |
| 14               | 6                | 0              | -6.082614               | -0.989834 | 0.801574  |
| 15               | 6                | 0              | -7.480719               | -0.987361 | 0.822947  |
| 16               | 6                | 0              | -8.229461               | -0.073904 | 0.073389  |
| 17               | 6                | 0              | -7.534410               | 0.849394  | -0.710178 |
| 18               | 6                | 0              | -6.135442               | 0.877695  | -0.759948 |
| 19               | 6                | 0              | -9.752624               | -0.077468 | 0.104028  |
| 20               | 6                | 0              | -10.336064              | -1.396170 | -0.437805 |
| 21               | 6                | 0              | -10.300202              | 0.231283  | 1.510370  |
| 22               | 6                | 0              | -5.325026               | -2.022232 | 1.637635  |
| 23               | 6                | 0              | -5.597705               | -1.858858 | 3.144749  |
| 24               | 6                | 0              | -5.615925               | -3.462390 | 1.174150  |
| 25               | 6                | 0              | -5.440461               | 1.922806  | -1.633130 |
| 26               | 6                | 0              | -5.786931               | 1.753189  | -3.124349 |
| 27               | 6                | 0              | -5.734232               | 3.357815  | -1.155527 |
| 28               | 6                | 0              | 0.651546                | -0.005359 | -0.145017 |
| 29               | 6                | 0              | 1.431212                | -0.297803 | 1.065016  |
| 30               | 6                | 0              | 2.832282                | -0.290383 | 1.151674  |
| 31               | 14               | 0              | 4.000360                | -0.085152 | -0.298869 |
| 32               | 6                | 0              | 2.718537                | 0.290387  | -1.600372 |
| 33               | 6                | 0              | 1.333620                | 0.314847  | -1.406113 |
| 34               | 16               | 0              | 3.139256                | 0.936297  | -3.158518 |
| 35               | 6                | 0              | 1.480282                | 1.249141  | -3.555949 |
| 36               | 6                | 0              | 0.649059                | 0.896595  | -2.540950 |
| 37               | 6                | 0              | 0.828357                | -0.799456 | 2.281039  |
| 38               | 6                | 0              | 1.726663                | -1.091798 | 3.256362  |
| 39               | 16               | 0              | 3.353445                | -0.828768 | 2.719874  |
| 40               | 6                | 0              | 5.245788                | 1.340810  | -0.207077 |
| 41               | 6                | 0              | 4.875839                | -1.731598 | -0.659893 |
| 42               | 6                | 0              | 4.434595                | -2.455761 | -1.759643 |
| 43               | 6                | 0              | 4.956958                | -3.729435 | -2.086380 |
| 44               | 6                | 0              | 5.928888                | -4.295506 | -1.298885 |
| 45               | 6                | 0              | 6.425369                | -3.610435 | -0.158230 |
| 46               | 6                | 0              | 5.903408                | -2.311901 | 0.168040  |
| 47               | 6                | 0              | 6.526149                | 1.103034  | -0.690536 |
| 48               | 6                | 0              | 7.514336                | 2.114147  | -0.743139 |
| 49               | 6                | 0              | 7.221787                | 3.381979  | -0.304291 |
| 50               | 6                | 0              | 5.929442                | 3.696386  | 0.193756  |
| 51               | 6                | 0              | 4.922127                | 2.672593  | 0.240434  |

|     |   |   |            |           |           |
|-----|---|---|------------|-----------|-----------|
| 52  | 6 | 0 | 7.429985   | -4.190551 | 0.661852  |
| 53  | 6 | 0 | 7.915544   | -3.528720 | 1.765863  |
| 54  | 6 | 0 | 7.414648   | -2.247417 | 2.090682  |
| 55  | 6 | 0 | 6.440832   | -1.659528 | 1.312992  |
| 56  | 6 | 0 | 5.617711   | 5.009689  | 0.636477  |
| 57  | 6 | 0 | 4.361116   | 5.321906  | 1.101033  |
| 58  | 6 | 0 | 3.361145   | 4.323434  | 1.140570  |
| 59  | 6 | 0 | 3.635644   | 3.039058  | 0.724140  |
| 60  | 1 | 0 | 0.104486   | 1.835421  | 1.989010  |
| 61  | 1 | 0 | -1.734962  | 2.998758  | 3.415347  |
| 62  | 1 | 0 | -1.842109  | -3.015439 | -3.595330 |
| 63  | 1 | 0 | 0.039821   | -1.835732 | -2.237287 |
| 64  | 1 | 0 | -8.000326  | -1.717770 | 1.439524  |
| 65  | 1 | 0 | -8.104125  | 1.567643  | -1.297221 |
| 66  | 1 | 0 | -10.089783 | 0.728174  | -0.562892 |
| 67  | 1 | 0 | -11.431893 | -1.354448 | -0.462887 |
| 68  | 1 | 0 | -9.978079  | -1.599147 | -1.453068 |
| 69  | 1 | 0 | -10.049850 | -2.246639 | 0.192399  |
| 70  | 1 | 0 | -11.395828 | 0.282958  | 1.497785  |
| 71  | 1 | 0 | -9.916867  | 1.187624  | 1.882647  |
| 72  | 1 | 0 | -10.011907 | -0.545340 | 2.228779  |
| 73  | 1 | 0 | -4.251130  | -1.848829 | 1.486669  |
| 74  | 1 | 0 | -5.001937  | -2.574323 | 3.724920  |
| 75  | 1 | 0 | -5.344374  | -0.848734 | 3.484426  |
| 76  | 1 | 0 | -6.653379  | -2.036941 | 3.382013  |
| 77  | 1 | 0 | -5.019603  | -4.181539 | 1.749136  |
| 78  | 1 | 0 | -5.376188  | -3.591262 | 0.113162  |
| 79  | 1 | 0 | -6.672698  | -3.720436 | 1.312656  |
| 80  | 1 | 0 | -4.357287  | 1.768948  | -1.536875 |
| 81  | 1 | 0 | -5.235157  | 2.479253  | -3.734137 |
| 82  | 1 | 0 | -5.532402  | 0.747751  | -3.476758 |
| 83  | 1 | 0 | -6.856524  | 1.911409  | -3.306919 |
| 84  | 1 | 0 | -5.181908  | 4.087369  | -1.760619 |
| 85  | 1 | 0 | -5.442699  | 3.492381  | -0.108291 |
| 86  | 1 | 0 | -6.801398  | 3.595670  | -1.239685 |
| 87  | 1 | 0 | 1.217169   | 1.695535  | -4.505857 |
| 88  | 1 | 0 | -0.420067  | 1.055722  | -2.575959 |
| 89  | 1 | 0 | -0.236092  | -0.941866 | 2.404782  |
| 90  | 1 | 0 | 1.529210   | -1.465279 | 4.252493  |
| 91  | 1 | 0 | 3.657435   | -2.043952 | -2.396724 |
| 92  | 1 | 0 | 4.579942   | -4.254649 | -2.959746 |
| 93  | 1 | 0 | 6.333364   | -5.277059 | -1.535475 |
| 94  | 1 | 0 | 6.795232   | 0.110031  | -1.038372 |
| 95  | 1 | 0 | 8.502306   | 1.877613  | -1.128640 |
| 96  | 1 | 0 | 7.973951   | 4.167124  | -0.335983 |
| 97  | 1 | 0 | 7.810306   | -5.174492 | 0.396998  |
| 98  | 1 | 0 | 8.683487   | -3.983841 | 2.385248  |
| 99  | 1 | 0 | 7.803087   | -1.720011 | 2.957580  |
| 100 | 1 | 0 | 6.095297   | -0.663710 | 1.570942  |
| 101 | 1 | 0 | 6.395759   | 5.768654  | 0.596098  |
| 102 | 1 | 0 | 4.133803   | 6.330812  | 1.434286  |
| 103 | 1 | 0 | 2.366839   | 4.571891  | 1.502026  |
| 104 | 1 | 0 | 2.853800   | 2.289401  | 0.766944  |

---



### Reference

- [1] Y. Adachi, T. Nomura, S. Tazuhara, H. Naito, and J. Ohshita, *Chem. Commun.* 2021, 57, 1316.
- [2] J. F. Kannengiesser, M. Briesenick, D. Meier, V. Huch, B. Morgenstern, and G. Kickelbick, *Chem. Eur. J.* 2021, 27, 16461.
- [3] K. Yamada, Y. Adachi, and J. Ohshita, *Chem. Eur. J.*, 2023, 29, e202302370.
- [4] Gaussian 16, Revision A.03; Gaussian, Inc.: Wallingford, CT, 2016, <https://gaussian.com/gaussian16/>
- [5] T. Ogoshi, K. Kitajima, T. Aoki, S. Fujinami, T. Yamagishi, Y. Nakamoto, *J. Org. Chem.* 2010, 75, 3268.
